# Supplementary material
Source: PubMed Central journal article supplement (PMC3432975)

# A Mild, Palladium-Catalyzed Method for the Dehydrohalogenation of Alkyl Bromides: Synthetic and Mechanistic Studies

Alex C. Bissember,<sup>†‡</sup> Anna Levina,<sup>†</sup> and Gregory C. Fu<sup>†‡\*</sup>

<sup>†</sup>Department of Chemistry, Massachusetts Institute of Technology,  
Cambridge, Massachusetts 02139, United States

<sup>‡</sup>Division of Chemistry and Chemical Engineering, California Institute of Technology,  
Pasadena, California 91125, United States

## Supporting Information

### Table of Contents

|                                                        |      |
|--------------------------------------------------------|------|
| I. General                                             | S-1  |
| II. Preparation of Materials                           | S-1  |
| III. Palladium-Catalyzed Dehydrohalogenation Reactions | S-15 |
| IV. Mechanistic Studies                                | S-24 |
| V. <sup>1</sup> H NMR Spectra                          | S-33 |

### I. General

The following reagents were purchased and used as received: P(*t*-Bu)<sub>2</sub>Me (Aldrich), Pd<sub>2</sub>(dba)<sub>3</sub> (Strem), [HP(*t*-Bu)<sub>2</sub>Me]BF<sub>4</sub> (Aldrich), Cy<sub>2</sub>NH (Aldrich), 2,2,6,6-tetramethylpiperidine (TMP; Aldrich), KO*t*-Bu (Strem), LiOMe (Aldrich), and 1,4-dioxane (Aldrich, anhydrous). Pd(P(*t*-Bu)<sub>2</sub>Me)<sub>2</sub> [479210-19-0] was prepared according to a literature procedure.<sup>1</sup>

Unless otherwise specified, reactions were conducted with magnetic stirring in oven-dried glassware under an inert atmosphere.

### II. Preparation of Materials

These procedures have not been optimized.

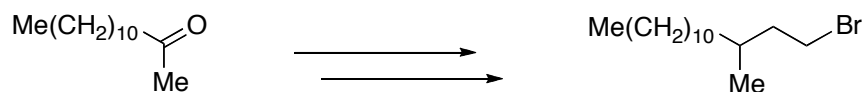

#### 1-Bromo-3-methyltetradecane

Triethyl phosphonoacetate (11.9 mL, 60.0 mmol) was added dropwise to a mixture of NaH (1.44 mg, 60.0 mmol) in THF (100 mL) at 0 °C. After 1 h of stirring, a solution of 2-tridecanone

(1) Hills, I. D.; Netherton, M. R.; Fu, G. C. *Angew. Chem. Int. Ed.* **2003**, *42*, 5749–5752.

(9.90 g, 50.0 mmol) in THF (50 mL) was added dropwise to the solution of olefinating agent, and the resulting mixture was allowed to slowly warm to r.t. After 12 h, H<sub>2</sub>O (40 mL) was added, the phases were separated, and the aqueous layer was extracted with Et<sub>2</sub>O (2 x 20 mL). The combined organic phases were dried (MgSO<sub>4</sub>), filtered, and concentrated under reduced pressure. The resulting residue was then filtered through a pad of silica (~5 cm deep pad contained in a sintered glass funnel), and the solids thus retained were washed with a 5% EtOAc/hexane solution (300 mL). The combined filtrates were concentrated under reduced pressure, and the resulting oil was subjected to flash chromatography (silica; 5% EtOAc/hexane), which provided (*E*)-ethyl 3-methyltetradec-2-enoate (10.3 g, 77%) as a clear, colorless oil.

A solution of (*E*)-ethyl 3-methyltetradec-2-enoate (4.50 g, 15.9 mmol) in MeOH (100 mL) was treated with 10% palladium on carbon (500 mg), and the resulting mixture was maintained under a hydrogen atmosphere (1 atm) at r.t. for 18 h. Next, the reaction mixture was filtered through Celite™ (~3 cm deep pad contained in a sintered glass funnel), and the solids thus retained were washed with CH<sub>2</sub>Cl<sub>2</sub> (50 mL). The combined filtrates were concentrated under reduced pressure to afford ethyl 3-methyltetradecanoate, which was used without purification in the next reaction.

A solution of ethyl 3-methyltetradecanoate in Et<sub>2</sub>O (20 mL) was added dropwise to a suspension of LiAlH<sub>4</sub> (1.90 g, 50.1 mmol) in Et<sub>2</sub>O (120 mL) at 0 °C. The resulting mixture was allowed to slowly warm to r.t. After 22 h, the reaction mixture was cooled to 0 °C, and Et<sub>2</sub>O (50 mL), H<sub>2</sub>O (1.9 mL), NaOH (6 M aqueous solution; 1.9 mL), and H<sub>2</sub>O (5.7 mL) were added in this order. The resulting mixture was allowed to warm to r.t., maintained at this temperature for 15 min, and then dried (MgSO<sub>4</sub>). After 15 min, the reaction mixture was filtered, and the solids thus retained were washed with CH<sub>2</sub>Cl<sub>2</sub> (100 mL). The combined filtrates were concentrated under reduced pressure to afford 3-methyltetradecan-1-ol (8.6 g, 98% over 2 steps from (*E*)-ethyl 3-methyltetradec-2-enoate) as a clear, colorless oil.

PPh<sub>3</sub>Br<sub>2</sub> (6.60 g, 15.7 mmol) was added to a solution of 3-methyltetradecan-1-ol (3.00 g, 13.1 mmol) and imidazole (1.07 g, 15.7 mmol) in CH<sub>2</sub>Cl<sub>2</sub> (30 mL) at 0 °C. Next, the reaction mixture was allowed to slowly warm to r.t. After 19 h, Na<sub>2</sub>S<sub>2</sub>O<sub>3</sub> (saturated aqueous solution; 10 mL) and NaOH (6 M aqueous solution; 5 mL) were added, the phases were separated, and the aqueous layer was extracted with CH<sub>2</sub>Cl<sub>2</sub> (2 x 10 mL). The combined organic phases were then dried (MgSO<sub>4</sub>), filtered, and concentrated under reduced pressure. The resulting residue was filtered through a pad of silica (~5 cm deep pad contained in a sintered glass funnel), and the solids thus retained were washed with a 5% EtOAc/hexane solution (300 mL). The combined filtrates were concentrated under reduced pressure, and the resulting oil was subjected to flash chromatography (silica; hexane), which provided the title compound (2.80 g, 74%) as a clear, colorless oil.

<sup>1</sup>H NMR (500 MHz, CDCl<sub>3</sub>) δ 3.49-3.38 (m, 2H), 1.92-1.85 (m, 1H), 1.71-1.55 (m, 2H), 1.26 (br s, 20H), 0.89 (d, 6H, *J* = 3.9 Hz).

<sup>13</sup>C NMR (125 MHz, CDCl<sub>3</sub>) δ 40.2, 36.3, 32.15, 32.09, 31.8, 30.0, 29.8, 29.5, 27.0, 22.9, 19.1, 14.3.

FT-IR (neat) 2976, 2924, 2854, 1466, 1379, 1262, 1216, 721 cm<sup>-1</sup>.

MS (EI) *m/z* (M<sup>+</sup>) calcd for C<sub>15</sub>H<sub>31</sub>Br: 290, found: 290.

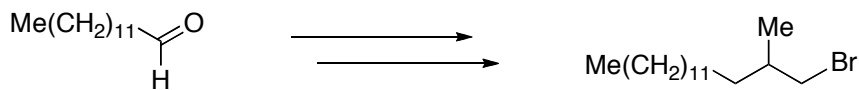

### 1-Bromo-2-methylpentadecane

Triethyl 2-phosphonopropionate (5.80 g, 24.2 mmol) was added dropwise to a mixture of NaH (580 mg, 24.2 mmol) in THF (70 mL) at 0 °C. After 1 h, a solution of tridecanal (4.00 g, 20.2 mmol) in THF (50 mL) was added dropwise to the solution of olefinating agent, and the resulting mixture was allowed to slowly warm to r.t. After 16 h, H<sub>2</sub>O (30 mL) was added, the phases were separated, and the aqueous layer was extracted with Et<sub>2</sub>O (2 x 20 mL). The combined organic phases were then dried (MgSO<sub>4</sub>), filtered, and concentrated under reduced pressure. The resulting residue was filtered through a pad of silica (~5 cm deep pad contained in a sintered glass funnel), and the solids thus retained were washed with a 5% EtOAc/hexane solution (300 mL). The combined filtrates were concentrated under reduced pressure, and the resulting oil was subjected to flash chromatography (silica; 5% EtOAc/hexane), which provided (*E*)-ethyl 2-methylpentadec-2-enoate (4.60 g, 81%) as a clear, colorless solid.

A solution of (*E*)-ethyl 2-methylpentadec-2-enoate (4.50 g, 15.9 mmol) in MeOH (50 mL) was treated with 10% palladium on carbon (250 mg), and the resulting mixture was maintained under a hydrogen atmosphere (1 atm) at r.t. for 18 h. Next, the reaction mixture was filtered through Celite™ (~3 cm deep pad contained in a sintered glass funnel), and the solids thus retained were washed with CH<sub>2</sub>Cl<sub>2</sub> (30 mL). The combined filtrates were concentrated under reduced pressure to afford ethyl 2-methylpentadecanoate, which was used without purification in the next reaction.

A solution of ethyl 2-methylpentadecanoate in Et<sub>2</sub>O (10 mL) was added dropwise to a suspension of LiAlH<sub>4</sub> (600 mg, 15.8 mmol) in Et<sub>2</sub>O (60 mL) at 0 °C. The resulting mixture was allowed to slowly warm to r.t. After 20 h, the mixture was cooled to 0 °C, and Et<sub>2</sub>O (30 mL), H<sub>2</sub>O (0.6 mL), NaOH (6 M aqueous solution; 0.6 mL), and H<sub>2</sub>O (1.8 mL) were added in this order. The resulting mixture was warmed to r.t., maintained at this temperature for 15 min, then dried (MgSO<sub>4</sub>). After 15 min, the reaction mixture was filtered, and the solids thus retained were washed with CH<sub>2</sub>Cl<sub>2</sub> (50 mL). The combined filtrates were concentrated under reduced pressure to afford 2-methylpentadecan-1-ol (2.70 g, 70% over 2 steps from (*E*)-ethyl 2-methylpentadec-2-enoate) as a clear, colorless oil.

PPh<sub>3</sub>Br<sub>2</sub> (2.50 g, 5.94 mmol) was added to a solution of 2-methylpentadecan-1-ol (1.20 g, 4.95 mmol) and imidazole (400 mg, 5.94 mmol) in CH<sub>2</sub>Cl<sub>2</sub> (20 mL) at 0 °C. The reaction mixture was allowed to slowly warm to r.t. After 16 h, Na<sub>2</sub>S<sub>2</sub>O<sub>3</sub> (saturated aqueous solution; 10 mL) and NaOH (6 M aqueous solution; 5 mL) were added, the phases were separated, and the aqueous layer was extracted with CH<sub>2</sub>Cl<sub>2</sub> (2 x 10 mL). The combined organic phases were dried (MgSO<sub>4</sub>), filtered, and concentrated under reduced pressure. The resulting residue was then filtered through a pad of silica (~5 cm deep pad contained in a sintered glass funnel), and the solids thus retained were washed with a 5% EtOAc/hexane solution (300 mL). The combined filtrates were concentrated under reduced pressure, and the resulting oil was subjected to flash chromatography (silica; hexane), which provided the title compound (1.45 g, 95%) as a clear, colorless oil.

<sup>1</sup>H NMR (500 MHz, CDCl<sub>3</sub>) δ 3.40 (dd, 1H, *J* = 5.0, 10.0 Hz), 3.33 (dd, 1H, *J* = 5.0, 10.0 Hz), 1.82-1.76 (m, 1H), 1.46-1.41 (m, 1H), 1.26 (br s, 23H), 1.01 (d, 3H, *J* = 7.0 Hz), 0.89 (t, 3H, *J* = 7.0 Hz).

$^{13}\text{C}$  NMR (125 MHz,  $\text{CDCl}_3$ )  $\delta$  41.4, 35.3, 35.0, 32.1, 29.90, 29.88, 29.87, 29.83, 29.79, 29.6, 27.1, 22.9, 18.9, 14.3.

FT-IR (neat) 2957, 2925, 2854, 1466, 1378, 1230, 721  $\text{cm}^{-1}$ .

MS (EI)  $m/z$  ( $\text{M}-\text{Br}^+$ ) calcd for  $\text{C}_{16}\text{H}_{33}$ : 225, found: 225.

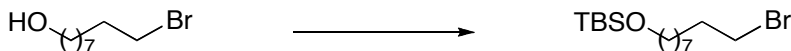

### 9-Bromo-1-(*tert*-butyldimethylsilyloxy)nonane

TBSCl (675 mg, 4.48 mmol) was added to a solution of 9-bromononan-1-ol (1.00 g, 4.48 mmol), imidazole (460 mg, 6.72 mmol), and DMAP (55 mg, 0.45 mmol) in  $\text{CH}_2\text{Cl}_2$  (20 mL) at 0  $^\circ\text{C}$ . The mixture was allowed to slowly warm to r.t. After 18 h,  $\text{NH}_4\text{Cl}$  (saturated aqueous solution; 10 mL) was added, the phases were separated, and the aqueous layer was extracted with  $\text{CH}_2\text{Cl}_2$  (2 x 20 mL). The combined organic phases were then dried ( $\text{MgSO}_4$ ), filtered, and concentrated under reduced pressure. The resulting residue was subjected to flash chromatography (silica; 1% EtOAc/hexane), which provided the title compound (1.30 g, 86%) as a clear, colorless oil.

$^1\text{H}$  NMR (500 MHz,  $\text{CDCl}_3$ )  $\delta$  3.59 (t, 2H,  $J = 11.0$  Hz), 3.40 (t, 2H,  $J = 11.0$  Hz), 1.85 (pentet, 2H,  $J = 12.0$  Hz), 1.53-1.29 (m, 12H), 0.89 (s, 9H), 0.04 (s, 6H).

$^{13}\text{C}$  NMR (125 MHz,  $\text{CDCl}_3$ )  $\delta$  63.4, 34.0, 32.96, 32.95, 29.5, 29.4, 28.8, 28.3, 26.1, 25.9, 18.5, -5.2.

FT-IR (neat) 2930, 2856, 1737, 1472, 1255, 1100, 836, 775  $\text{cm}^{-1}$ .

MS (EI)  $m/z$  ( $\text{M}+\text{H}^+$ ) calcd for  $\text{C}_{15}\text{H}_{34}\text{BrOSi}$ : 337, found: 337.

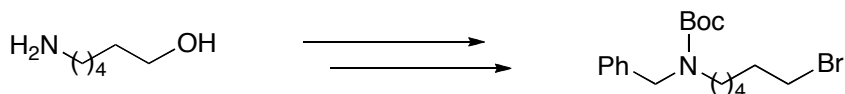

### *tert*-Butyl-*N*-benzyl(6-bromohexyl)carbamate

A mixture of benzaldehyde (1.83 mL, 18.0 mmol), 6-amino-hexan-1-ol (2.00 g, 17.1 mmol), and 4 $\text{\AA}$  molecular sieves (4 g) in toluene (20 mL) was heated at reflux. After 20 h, the reaction mixture was filtered, and the filtrate was concentrated under reduced pressure to provide 6-(benzylideneamino)hexan-1-ol. This somewhat unstable material was used without purification in the next reaction.

$\text{NaBH}_4$  (800 mg, 21.1 mmol) was added to a solution of 6-(benzylideneamino)hexan-1-ol in MeOH (20 mL) at 0  $^\circ\text{C}$ . After 16 h, the mixture was concentrated,  $\text{CH}_2\text{Cl}_2$  (20 mL) and  $\text{H}_2\text{O}$  (10 mL) were added, the phases were separated, and the aqueous layer was extracted with  $\text{CH}_2\text{Cl}_2$  (2 x 20 mL). The combined organic phases were dried ( $\text{MgSO}_4$ ), filtered, and concentrated under reduced pressure to provide 6-(benzylamino)hexan-1-ol, which was used without purification in the next reaction.

A solution of di-*tert*-butyl dicarbonate (3.80 g, 17.4 mmol) in  $\text{CH}_2\text{Cl}_2$  (20 mL) was added dropwise to a solution of 6-(benzylamino)hexan-1-ol in  $\text{CH}_2\text{Cl}_2$  (20 mL) and NaOH (1 M aqueous solution; 16 mL). After 18 h,  $\text{H}_2\text{O}$  (10 mL) was added, the phases were separated, and the aqueous layer was extracted with  $\text{CH}_2\text{Cl}_2$  (2 x 10 mL). The combined organic phases were then dried ( $\text{MgSO}_4$ ), filtered, and concentrated under reduced pressure to provide *tert*-butyl benzyl(6-hydroxyhexyl)carbamate, which was used without purification in the next reaction.

PPh<sub>3</sub>Br<sub>2</sub> (8.70 g, 20.6 mmol) was added to a solution of *tert*-butyl benzyl(6-hydroxyhexyl)carbamate and imidazole (1.40 g, 20.6 mmol) in CH<sub>2</sub>Cl<sub>2</sub> (60 mL) at 0 °C. The mixture was allowed to slowly warm to r.t. After 20 h, Na<sub>2</sub>S<sub>2</sub>O<sub>3</sub> (saturated aqueous solution; 20 mL) and NaOH (6 M aqueous solution; 10 mL) were added, the phases were separated, and the aqueous layer was extracted with CH<sub>2</sub>Cl<sub>2</sub> (2 x 20 mL). The combined organic phases were then dried (MgSO<sub>4</sub>), filtered, and concentrated under reduced pressure. The resulting residue was subjected to flash chromatography (silica; 95:5:1 *v/v/v* hexane/EtOAc/Et<sub>3</sub>N), which provided the title compound (3.2 g, 51% over 4 steps from 6-amino-hexan-1-ol) as a clear, colorless oil.

<sup>1</sup>H NMR (500 MHz, CDCl<sub>3</sub>) δ 7.34–7.24 (m, 5H), 4.45 (br s, 1H), 4.41 (br s, 1H), 3.38 (t, 2H, *J* = 7.0 Hz), 3.22 (br s, 1H), 3.13 (br s, 1H), 1.85–1.79 (m, 2H), 1.51 (br s, 6H), 1.44 (br s, 6H), 1.27 (br s, 3H).

<sup>13</sup>C NMR (125 MHz, CDCl<sub>3</sub>) δ 156.0, 138.7, 128.4, 127.7, 127.1, 79.5, 50.6, 50.0, 46.5, 33.7, 32.7, 28.5, 27.9, 26.0.

FT-IR (neat) 2974, 2933, 2859, 1695, 1455, 1416, 1365, 1243, 1170, 880, 730, 700 cm<sup>-1</sup>.

MS (EI) *m/z* (M–isobutylene<sup>+</sup>) calcd for C<sub>14</sub>H<sub>20</sub>BrNO<sub>2</sub>: 313, found: 313.

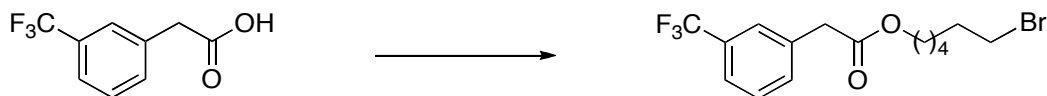

#### 6-Bromoethyl 2-(3-(trifluoromethyl)phenyl)acetate

A mixture of 2-(3-(trifluoromethyl)phenyl)acetic acid (1.22 g, 6.00 mmol), 1,6-dibromohexane (4.40 g, 18.0 mmol), and K<sub>2</sub>CO<sub>3</sub> (2.50 g, 18.0 mmol) in acetone (40 mL) was heated at reflux. After 24 h, the mixture was allowed to cool to r.t., and it was filtered through Celite™ (~2 cm deep pad contained in a sintered glass funnel); the solids thus retained were washed with acetone (40 mL). The combined filtrates were then concentrated under reduced pressure, and the resulting residue was subjected to flash chromatography (silica; 5% EtOAc/hexane), which provided the title compound (1.60 g, 79%) as a clear, colorless oil.

<sup>1</sup>H NMR (500 MHz, CDCl<sub>3</sub>) δ 7.56–7.44 (m, 4H), 4.11 (t, 2H, *J* = 7.0 Hz), 3.69 (s, 2H), 3.39 (t, 2H, *J* = 7.0 Hz), 1.83 (pentet, 2H, *J* = 8.0 Hz), 1.64 (pentet, 2H, *J* = 8.0 Hz), 1.43 (pentet, 2H, *J* = 8.0 Hz), 1.34 (pentet, 2H, *J* = 8.0 Hz).

<sup>13</sup>C NMR (125 MHz, CDCl<sub>3</sub>) δ 170.9, 135.1, 132.8, 131.9 (q, *J* = 32 Hz), 129.1, 126.2, 124.12 (q, *J* = 271 Hz), 124.04, 65.1, 41.1, 33.8, 28.4, 27.8, 25.1.

FT-IR (neat) 2939, 2861, 1737, 1452, 1332, 1164, 1125, 1077, 701 cm<sup>-1</sup>.

MS (EI) *m/z* (M<sup>+</sup>) calcd for C<sub>15</sub>H<sub>18</sub>BrF<sub>3</sub>O<sub>2</sub>: 368, found: 368.

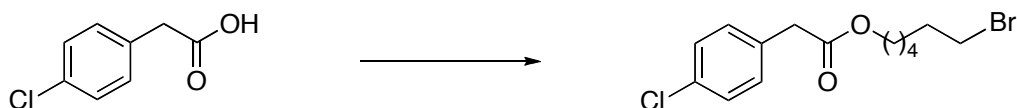

#### 6-Bromoethyl 2-(4-chlorophenyl)acetate

6-Bromoethyl 2-(4-chlorophenyl)acetate was prepared in the same manner as described for the synthesis of 6-bromoethyl 2-(3-(trifluoromethyl)phenyl)acetate, but now using 2-(4-chlorophenyl)acetic acid. In this way, the title compound (1.40 g, 72%) was obtained as a clear,

colorless oil.

$^1\text{H}$  NMR (500 MHz,  $\text{CDCl}_3$ )  $\delta$  7.29 (d, 2H,  $J = 8.0$  Hz), 7.21 (d, 2H,  $J = 8.0$  Hz), 4.08 (t, 2H,  $J = 7.0$  Hz), 3.58 (s, 2H), 3.38 (t, 2H,  $J = 7.0$  Hz), 1.83 (pentet, 2H,  $J = 7.0$  Hz), 1.63 (pentet, 2H,  $J = 7.0$  Hz), 1.43 (pentet, 2H,  $J = 7.0$  Hz), 1.33 (pentet, 2H,  $J = 7.0$  Hz).

$^{13}\text{C}$  NMR (125 MHz,  $\text{CDCl}_3$ )  $\delta$  171.1, 133.0, 132.6, 130.7, 128.7, 64.9, 40.7, 33.7, 32.6, 28.4, 27.7, 25.0.

FT-IR (neat) 2938, 2860, 1736, 1493, 1252, 1159, 1091, 1017, 807  $\text{cm}^{-1}$ .

MS (EI)  $m/z$  ( $\text{M}^+$ ) calcd for  $\text{C}_{14}\text{H}_{18}\text{BrClO}_2$ : 334, found: 334.

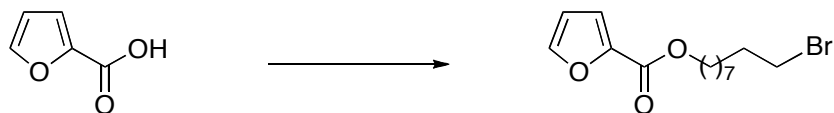

### 9-Bromononyl furan-2-carboxylate

A mixture of furan-2-carboxylic acid (807 mg, 7.20 mmol), 1,9-dibromononane (2.47 g, 8.63 mmol), and  $\text{K}_2\text{CO}_3$  (1.50 g, 10.8 mmol) in acetone (30 mL) was heated at reflux. After 14 h, the mixture was allowed to cool to r.t., and it was filtered through Celite™ (~2 cm deep pad contained in a sintered glass funnel); the solids thus retained were washed with acetone (20 mL). The combined filtrates were then concentrated under reduced pressure, and the resulting residue was subjected to flash chromatography (silica; 97:2:1 *v/v* hexane/EtOAc/ $\text{Et}_3\text{N}$ ), which provided the title compound (260 mg, 12%) as a clear, light-yellow oil.

$^1\text{H}$  NMR (500 MHz,  $\text{CCl}_3$ )  $\delta$  7.58 (dd, 1H,  $J = 1.0, 2.0$  Hz), 7.17 (dd, 1H,  $J = 1.0, 7.0$  Hz), 6.51 (dd, 1H,  $J = 2.0, 3.5$  Hz), 4.30 (t, 2H,  $J = 7.0$  Hz), 3.41 (t, 2H,  $J = 7.0$  Hz), 1.85 (pentet, 2H,  $J = 7.0$  Hz), 1.75 (pentet, 2H,  $J = 7.0$  Hz), 1.48-1.24 (m, 10H).

$^{13}\text{C}$  NMR (125 MHz,  $\text{C}_6\text{D}_6$ )  $\delta$  158.6, 146.1, 145.7, 117.7, 111.9, 64.9, 33.9, 33.0, 29.6, 29.4, 29.0, 28.9, 28.3, 26.1.

FT-IR (neat) 2930, 2856, 1718, 1474, 1296, 1180, 1119, 763  $\text{cm}^{-1}$ .

MS (EI)  $m/z$  ( $\text{M}^+$ ) calcd for  $\text{C}_{14}\text{H}_{21}\text{BrO}_3$ : 314, found: 314.

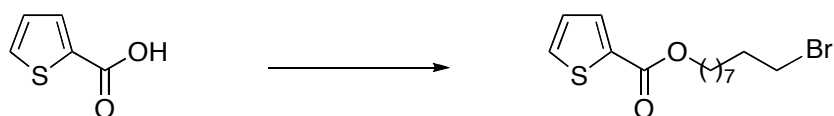

### 9-Bromononyl thiophene-2-carboxylate

9-Bromononyl thiophene-2-carboxylate was prepared in the same manner as described for the synthesis of 9-bromononyl furan-2-carboxylate, but now using thiophene-2-carboxylic acid. In this way, the title compound (510 mg, 20%) was obtained as a clear, light-yellow oil.

$^1\text{H}$  NMR (500 MHz,  $\text{C}_6\text{D}_6$ )  $\delta$  7.74 (dd, 1H,  $J = 1.5, 4.0$  Hz), 6.76 (dd, 1H,  $J = 1.0, 5.0$  Hz), 6.52-6.50 (m, 1H), 4.12 (t, 2H,  $J = 7.0$  Hz), 2.93 (t, 2H,  $J = 7.0$  Hz), 1.48-1.41 (m, 4H), 1.34-1.22 (m, 1H), 1.14-0.95 (m, 9H).

$^{13}\text{C}$  NMR (125 MHz,  $\text{C}_6\text{D}_6$ )  $\delta$  162.1, 134.7, 133.4, 132.1, 128.4, 65.2, 33.8, 33.0, 29.5, 29.4, 29.0, 28.9, 28.3, 26.2.

FT-IR (neat) 2929, 2855, 1710, 1527, 1420, 1260, 1095  $\text{cm}^{-1}$ .

MS (EI)  $m/z$  ( $\text{M}^+$ ) calcd for  $\text{C}_{14}\text{H}_{21}\text{BrO}_2\text{S}$ : 334, found: 334.

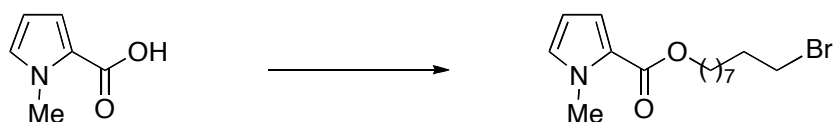

### 9-Bromononyl *N*-methylpyrrole-2-carboxylate

9-Bromononyl *N*-methylpyrrole-2-carboxylate was prepared in the same manner as described for the synthesis of 9-bromononyl furan-2-carboxylate, but now using *N*-methylpyrrole-2-carboxylic acid. In this way, the title compound (750 mg, 57%) was obtained as a clear, light-yellow oil.

$^1\text{H}$  NMR (500 MHz,  $\text{CDCl}_3$ )  $\delta$  6.94 (dd, 1H,  $J = 1.5, 4.0$  Hz), 6.79-6.76 (m, 1H), 6.11 (dd, 1H,  $J = 1.0, 5.0$  Hz), 4.21 (t, 2H,  $J = 7.0$  Hz), 3.93 (s, 3H), 3.41 (t, 2H,  $J = 7.0$  Hz), 1.84 (pentet, 2H,  $J = 7.0$  Hz), 1.72 (pentet, 2H,  $J = 7.0$  Hz), 1.44-1.33 (m, 10H).

$^{13}\text{C}$  NMR (125 MHz,  $\text{CDCl}_3$ )  $\delta$  161.4, 129.4, 122.7, 117.6, 107.8, 63.9, 36.8, 34.0, 32.8, 29.3, 29.2, 28.8, 28.7, 28.2, 26.0.

FT-IR (neat) 2929, 2855, 1701, 1532, 1466, 1416, 1321, 1246, 1114, 737  $\text{cm}^{-1}$ .

MS (EI)  $m/z$  ( $\text{M}^+$ ) calcd for  $\text{C}_{15}\text{H}_{24}\text{BrNO}_2$ : 329, found: 329.

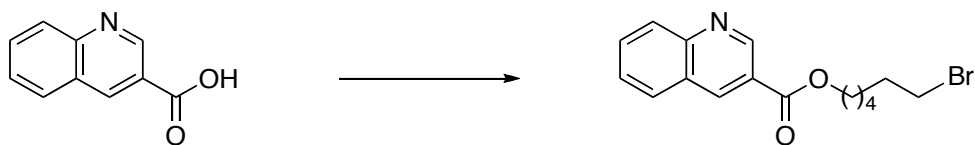

### 6-Bromohexyl quinoline-3-carboxylate

6-Bromohexyl quinoline-3-carboxylate was prepared in the same manner as described for the synthesis of 6-bromohexyl 2-(3-(trifluoromethyl)phenyl)acetate, but now using quinoline-3-carboxylic acid. In this way, the title compound (1.10 g, 63%) was obtained as a bright-yellow solid.

$^1\text{H}$  NMR (500 MHz,  $\text{C}_6\text{D}_6$ )  $\delta$  9.76 (s, 1H), 8.68 (s, 1H), 8.22 (d, 1H,  $J = 8.5$  Hz), 7.32 (d, 1H,  $J = 8.0$  Hz), 7.27 (dt, 1H,  $J = 1.0, 7.0$  Hz), 7.04 (dt, 1H,  $J = 1.0, 7.0$  Hz), 4.08 (t, 2H,  $J = 7.0$  Hz), 2.88 (t, 2H,  $J = 7.0$  Hz), 1.38-1.30 (m, 4H), 1.04-0.93 (m, 4H).

$^{13}\text{C}$  NMR (125 MHz,  $\text{C}_6\text{D}_6$ )  $\delta$  165.2, 150.5, 150.3, 138.5, 131.7, 130.1, 129.2, 127.3, 127.1, 123.7, 65.2, 33.7, 32.8, 28.7, 27.9, 25.3.

FT-IR (neat) 2936, 1719, 1367, 1287, 1238, 1199, 1104  $\text{cm}^{-1}$ .

MS (EI)  $m/z$  ( $\text{M}^+$ ) calcd for  $\text{C}_{16}\text{H}_{18}\text{BrNO}_2$ : 335, found: 335.

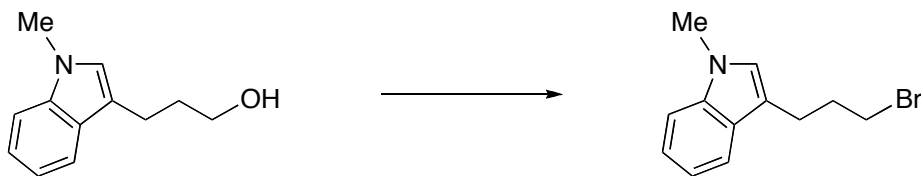

### 3-(3'-Bromopropyl)-*N*-methylindole

PPh<sub>3</sub>Br<sub>2</sub> (3.70 g, 8.80 mmol) was added to a solution of 3-(*N*-methylindol-3'-yl)propan-1-ol<sup>2</sup> (1.85 g, 7.34 mmol) and imidazole (600 mg, 8.80 mmol) in CH<sub>2</sub>Cl<sub>2</sub> (30 mL) at 0 °C. The mixture was allowed to slowly warm to r.t. After 16 h, Na<sub>2</sub>S<sub>2</sub>O<sub>3</sub> (saturated aqueous solution; 10 mL) and NaOH (6 M aqueous solution; 10 mL) were added, the phases were separated, and the aqueous layer was extracted with CH<sub>2</sub>Cl<sub>2</sub> (2 x 20 mL). The combined organic phases were then dried (MgSO<sub>4</sub>), filtered, and concentrated under reduced pressure. The resulting residue was filtered through a pad of silica (~5 cm deep pad contained in a sintered glass funnel), and the solids thus retained were washed with a 10% EtOAc/hexane solution (300 mL). The combined filtrates were concentrated under reduced pressure, and the resulting oil was subjected to flash chromatography (silica; 95:5:1 *v/v* hexane/EtOAc/Et<sub>3</sub>N), which provided the title compound (1.55 g, 63%) as a clear, light-yellow oil.

<sup>1</sup>H NMR (500 MHz, CDCl<sub>3</sub>) δ 7.65 (dd, 1H, *J* = 1.0, 8.0 Hz), 7.35 (dd, 1H, *J* = 1.0, 8.0 Hz), 7.29 (dt, 1H, *J* = 1.0, 8.0 Hz), 7.18 (dt, 1H, *J* = 1.0, 8.0 Hz), 6.93 (s, 1H), 3.78 (s, 3H), 3.49 (t, 2H, *J* = 7.0 Hz), 2.98 (t, 2H, *J* = 7.0 Hz), 2.29 (pentet, 2H, *J* = 8.0 Hz).

<sup>13</sup>C NMR (125 MHz, CDCl<sub>3</sub>) δ 137.1, 127.8, 126.7, 121.6, 119.0, 118.8, 113.0, 109.3, 34.0, 33.2, 32.6, 23.3.

FT-IR (neat) 3054, 2933, 1615, 1473, 1377, 1326, 1252, 1239, 804, 740 cm<sup>-1</sup>.

MS (EI) *m/z* (M<sup>+</sup>) calcd for C<sub>12</sub>H<sub>14</sub>BrN: 251, found: 251.

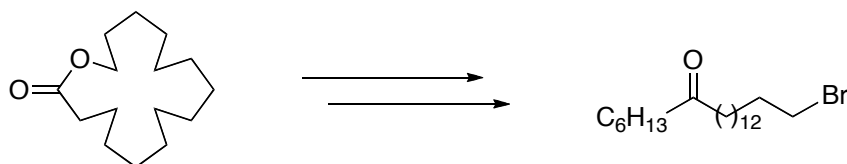

### 21-Bromohenicosan-7-one

Isopropylmagnesium chloride (2.0 M solution in Et<sub>2</sub>O; 30 mL, 60 mmol) was added dropwise to a mixture of pentadecanamide (2.60 g, 10.0 mmol) and *N,O*-dimethylhydroxylamine hydrochloride (3.00 g, 30.2 mmol) in THF (60 mL) at 0 °C. The resulting mixture was then warmed to r.t. After 1 h, it was cooled to 0 °C, and NH<sub>4</sub>Cl (saturated aqueous solution; 20 mL) was added. The phases were separated, and the aqueous layer was extracted with CH<sub>2</sub>Cl<sub>2</sub> (2 x 20 mL). The combined organic phases were then dried (MgSO<sub>4</sub>), filtered, and concentrated under reduced pressure to provide 15-hydroxy-*N*-methoxy-*N*-methylpentadecanamide, which was used without purification in the next reaction.

Hexylmagnesium bromide (2.0 M solution in Et<sub>2</sub>O; 25 mL, 50 mmol,) was added to a solution of 15-hydroxy-*N*-methoxy-*N*-methylpentadecanamide in THF (50 mL) at 0 °C. After 16 h, NH<sub>4</sub>Cl (saturated aqueous solution; 20 mL) was added, the phases were separated, and the aqueous layer was extracted with CH<sub>2</sub>Cl<sub>2</sub> (2 x 20 mL). The combined organic phases were dried (MgSO<sub>4</sub>), filtered, and concentrated under reduced pressure to provide 21-hydroxyhenicosan-7-one, which was used without purification in the next reaction.

PPh<sub>3</sub>Br<sub>2</sub> (1.55 g, 3.67 mmol) was added to a solution of 21-hydroxyhenicosan-7-one and imidazole (250 mg, 3.67 mmol) in CH<sub>2</sub>Cl<sub>2</sub> (50 mL) at 0 °C. The mixture was allowed to slowly warm to r.t. After 20 h, Na<sub>2</sub>S<sub>2</sub>O<sub>3</sub> (saturated aqueous solution; 10 mL) and NaOH (6 M aqueous

(2) Ferreira, E. M.; Stoltz, B. M. *J. Am. Chem. Soc.* **2003**, *125*, 9578–9579.



solution; 10 mL) were added, the phases were separated, and the aqueous layer was extracted with  $\text{CH}_2\text{Cl}_2$  (2 x 20 mL). The combined organic phases were dried ( $\text{MgSO}_4$ ), filtered, and concentrated under reduced pressure. The resulting residue was then filtered through a pad of silica (~5 cm deep pad contained in a sintered glass funnel), and the solids thus retained were washed with a 10% EtOAc/hexane solution (300 mL). The combined filtrates were concentrated under reduced pressure, and the resulting residue was subjected to flash chromatography (silica; 5% EtOAc/hexane), which provided the title compound (1.04 g, 27% over 3 steps from pentadecanolide) as a clear, colorless oil.

$^1\text{H}$  NMR (500 MHz,  $\text{CDCl}_3$ )  $\delta$  3.42 (t, 2H,  $J = 7.0$  Hz), 2.39 (t, 4H,  $J = 7.5$  Hz), 1.79 (pentet, 2H,  $J = 7.0$  Hz), 1.57-1.53 (m, 4H), 1.43 (pentet, 2H,  $J = 7.5$  Hz), 1.26 (br s, 24H), 0.88 (t, 3H,  $J = 6.5$  Hz).

$^{13}\text{C}$  NMR (125 MHz,  $\text{CDCl}_3$ )  $\delta$  211.8, 42.9, 34.2, 32.9, 31.7, 29.71, 29.70, 29.64, 29.58, 29.54, 29.4, 29.0, 28.9, 28.3, 24.0, 23.9, 22.6, 14.2.

FT-IR (neat) 3447, 2915, 2850, 1702, 1472  $\text{cm}^{-1}$ .

MS (EI)  $m/z$  ( $\text{M}^+$ ) calcd for  $\text{C}_{21}\text{H}_{41}\text{BrO}$ : 390, found: 390.

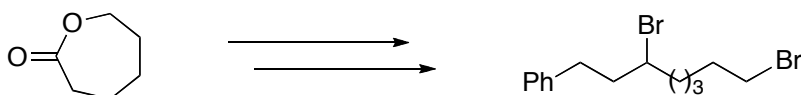

### (3,8-Dibromooctyl)benzene

Isopropylmagnesium chloride (2.0 M solution in  $\text{Et}_2\text{O}$ ; 72 mL, 144 mmol) was added dropwise to a mixture of 2-oxepanone (2.70 g, 23.9 mmol) and *N,O*-dimethylhydroxylamine hydrochloride (7.00 g, 71.8 mmol) in THF (100 mL) at 0 °C. The resulting mixture was then warmed to r.t. After 1 h, it was cooled to 0 °C, and  $\text{NH}_4\text{Cl}$  (saturated aqueous solution; 30 mL) was added. The phases were separated, and the aqueous layer was extracted with  $\text{CH}_2\text{Cl}_2$  (2 x 20 mL). The combined organic phases were dried ( $\text{MgSO}_4$ ), filtered, and concentrated under reduced pressure to provide 6-hydroxy-*N*-methoxy-*N*-methylhexanamide, which was used without purification in the next reaction.

2-Phenethylmagnesium chloride (1.0 M solution in  $\text{Et}_2\text{O}$ ; 60 mL, 60 mmol) was added to a solution of 6-hydroxy-*N*-methoxy-*N*-methylhexanamide in THF (50 mL) at 0 °C. After 2 h of stirring,  $\text{NH}_4\text{Cl}$  (saturated aqueous solution; 20 mL) was added, the phases were separated, and the aqueous layer was extracted with  $\text{CH}_2\text{Cl}_2$  (2 x 20 mL). The combined organic phases were then dried ( $\text{MgSO}_4$ ), filtered, and concentrated under reduced pressure. The resulting residue was subjected to flash chromatography (silica; 30% EtOAc/hexane), which provided 8-hydroxy-1-phenyloctan-3-one (3.40 g, 51% over 2 steps from 2-oxepanone) as a clear, colorless oil.

$\text{PPh}_3\text{Br}_2$  (6.90 g, 16.3 mmol) was added to a solution of 8-hydroxy-1-phenyloctan-3-one (3.0 g, 13.6 mmol) and imidazole (1.1 g, 16.3 mmol) in  $\text{CH}_2\text{Cl}_2$  (50 mL) at 0 °C. The mixture was allowed to slowly warm to r.t. After 12 h,  $\text{Na}_2\text{S}_2\text{O}_3$  (saturated aqueous solution; 20 mL) and NaOH (6 M aqueous solution; 10 mL) were added, the phases were separated, and the aqueous layer was extracted with  $\text{CH}_2\text{Cl}_2$  (2 x 20 mL). The combined organic phases were then dried ( $\text{MgSO}_4$ ), filtered, and concentrated under reduced pressure. The resulting residue was filtered through a pad of silica (~5 cm deep pad contained in a sintered glass funnel), and the solids thus retained were washed with a 10% EtOAc/hexane solution (300 mL). The combined filtrates were concentrated under reduced pressure to provide 8-bromo-1-phenyloctan-3-one, which was used without purification in the next reaction.

NaBH<sub>4</sub> (351 mg, 9.27 mmol) was added to a solution of 8-bromo-1-phenyloctan-3-one in MeOH (20 mL) at 0 °C. After 15 h, the mixture was concentrated, CH<sub>2</sub>Cl<sub>2</sub> (20 mL) and H<sub>2</sub>O (10 mL) were added, the phases were separated, and the aqueous layer was extracted with CH<sub>2</sub>Cl<sub>2</sub> (2 x 20 mL). The combined organic phases were dried (MgSO<sub>4</sub>), filtered, and concentrated under reduced pressure to provide 8-bromo-1-phenyloctan-3-ol, which was used without purification in the next reaction.

PPh<sub>3</sub>Br<sub>2</sub> (3.10 g, 7.42 mmol) was added to a solution of 8-bromo-1-phenyloctan-3-ol and imidazole (505 mg, 7.42 mmol) in CH<sub>2</sub>Cl<sub>2</sub> (25 mL) at 0 °C. The mixture was allowed to slowly warm to r.t. After 16 h, Na<sub>2</sub>S<sub>2</sub>O<sub>3</sub> (saturated aqueous solution; 10 mL) and NaOH (6 M aqueous solution; 5 mL) were added, the phases were separated, and the aqueous layer was extracted with CH<sub>2</sub>Cl<sub>2</sub> (2 x 20 mL). The combined organic phases were dried (MgSO<sub>4</sub>), filtered, and concentrated under reduced pressure. The resulting residue was filtered through a pad of silica (~5 cm deep pad contained in a sintered glass funnel), and the solids thus retained were washed with a 5% EtOAc/hexane solution (300 mL). The combined filtrates were concentrated under reduced pressure, and the resulting residue was subjected to flash chromatography (silica; 2% EtOAc/hexane), which provided the title compound (1.00 g, 27% over 3 steps from 8-hydroxy-1-phenyloctan-3-one) as a clear, light-yellow oil.

<sup>1</sup>H NMR (500 MHz, CDCl<sub>3</sub>) δ 7.32-7.21 (m, 5H), 3.98 (pentet, 1H, *J* = 8.0 Hz), 3.41 (t, 2H, *J* = 6.5 Hz), 2.94-2.88 (m, 1H), 2.79-2.73 (m, 1H), 2.18-2.07 (m, 2H), 1.88-1.80 (m, 4H), 1.61-1.44 (m, 4H).

<sup>13</sup>C NMR (125 MHz, CDCl<sub>3</sub>) δ 141.0, 128.60, 128.56, 126.2, 57.5, 40.8, 39.0, 33.8, 32.6, 27.6, 26.8.

FT-IR (neat) 3450, 3026, 2937, 2859, 1603, 1496, 1454, 1240, 749 cm<sup>-1</sup>.

MS (EI) *m/z* (M<sup>+</sup>) calcd for C<sub>14</sub>H<sub>20</sub>Br<sub>2</sub>: 348, found: 348.

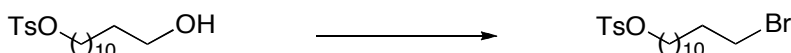

### 12-Bromo-1-(tosyloxy)dodecane

Tosyl chloride (863 mg, 4.52 mmol) was added to a solution of 12-bromododecan-1-ol (1.00 g, 3.77 mmol), Et<sub>3</sub>N (1.60 mL, 11.3 mmol), and DMAP (46 mg, 0.38 mmol) in CH<sub>2</sub>Cl<sub>2</sub> (20 mL) at 0 °C. The mixture was allowed to slowly warm to r.t. After 16 h, Na<sub>2</sub>S<sub>2</sub>O<sub>3</sub> (saturated aqueous solution; 10 mL) was added, the phases were separated, and the aqueous layer was extracted with CH<sub>2</sub>Cl<sub>2</sub> (1 x 20 mL). The combined organic phases were dried (MgSO<sub>4</sub>), filtered, and concentrated under reduced pressure. The resulting residue was subjected to flash chromatography (silica; 10% EtOAc/hexane), which provided the title compound (1.50 g, 95%) as a colorless solid.

<sup>1</sup>H NMR (500 MHz, CDCl<sub>3</sub>) δ 7.80 (d, 2H, *J* = 8.5 Hz), 7.35 (d, 2H, *J* = 8.5 Hz), 4.02 (t, 2H, *J* = 6.5 Hz), 3.41 (t, 2H, *J* = 7.0 Hz), 2.46 (s, 3H), 1.85 (pentet, 2H, *J* = 7.0 Hz), 1.63 (pentet, 2H, *J* = 7.0 Hz), 1.42 (pentet, 2H, *J* = 7.5 Hz), 1.29-1.22 (m, 14H).

<sup>13</sup>C NMR (125 MHz, CDCl<sub>3</sub>) δ 144.7, 133.2, 129.9, 128.0, 70.8, 34.2, 32.9, 29.52, 29.50, 29.47, 29.4, 29.0, 28.9, 28.8, 28.2, 25.4, 21.7.

FT-IR (neat) 2920, 2852, 1600, 1471, 1357, 1173, 955, 842, 812 cm<sup>-1</sup>.

MS (EI) *m/z* (M-OTs<sup>+</sup>) calcd for C<sub>12</sub>H<sub>24</sub>Br: 247, found: 247.

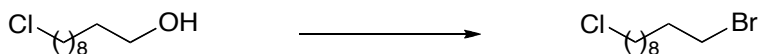

### 1-Bromo-10-chlorodecane

1-Bromo-10-chlorodecane was prepared in the same manner as described for the synthesis of 3-(3'-bromopropyl)-*N*-methylindole, but now using 10-bromodecan-1-ol. In this way, the title compound (2.30 g, 86%) was obtained as a clear, colorless oil.

$^1\text{H}$  NMR (500 MHz,  $\text{CDCl}_3$ )  $\delta$  3.54 (t, 2H,  $J = 7.0$  Hz), 3.42 (t, 2H,  $J = 7.0$  Hz), 1.86 (pentet, 2H,  $J = 7.0$  Hz), 1.77 (pentet, 2H,  $J = 7.0$  Hz), 1.44-1.41 (m, 4H), 1.31 (br s, 8H).

$^{13}\text{C}$  NMR (125 MHz,  $\text{CDCl}_3$ )  $\delta$  45.2, 34.0, 32.8, 32.7, 29.38, 29.36, 28.9, 28.8, 28.2, 26.9.

FT-IR (neat) 2929, 2855, 2361, 1465, 723  $\text{cm}^{-1}$ .

MS (EI)  $m/z$  ( $\text{M}^+$ ) calcd for  $\text{C}_{10}\text{H}_{20}\text{BrCl}$ : 256, found: 256.

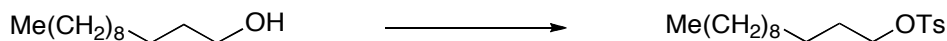

### 1-(Tosyloxy)dodecane

1-(Tosyloxy)dodecane was prepared in the same manner as described for the synthesis of 12-bromo-1-(tosyloxy)dodecane, but now using dodecan-1-ol. In this way, the title compound (7.80 g, 87%) was obtained as a clear, colorless oil.

$^1\text{H}$  NMR (500 MHz,  $\text{CDCl}_3$ )  $\delta$  7.79 (d, 2H,  $J = 7.0$  Hz), 7.35 (d, 2H,  $J = 8.5$  Hz), 4.02 (t, 2H,  $J = 6.5$  Hz), 2.45 (s, 3H), 1.63 (pentet, 2H,  $J = 7.0$  Hz), 1.30-1.22 (m, 18H), 0.88 (t, 3H,  $J = 7.0$  Hz).

$^{13}\text{C}$  NMR (125 MHz,  $\text{CDCl}_3$ )  $\delta$  144.7, 133.3, 129.9, 128.0, 70.8, 32.0, 29.7, 29.6, 29.5, 29.4, 29.0, 28.9, 25.4, 22.8, 21.7, 14.2.

FT-IR (neat) 2925, 2855, 1599, 1467, 1363, 1178, 1098, 953, 815  $\text{cm}^{-1}$ .

MS (ESI)  $m/z$  ( $\text{M}+\text{Na}^+$ ) calcd for  $\text{C}_{19}\text{H}_{32}\text{NaO}_3\text{S}$ : 363, found: 363.

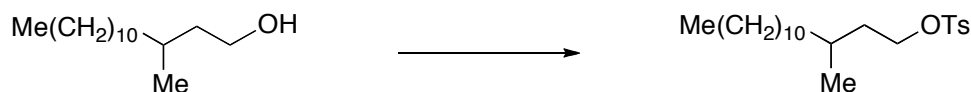

### 3-Methyl-1-(tosyloxy)tetradecane

3-Methyl-1-(tosyloxy)tetradecane was prepared in the same manner as described for the synthesis of 12-bromo-1-(tosyloxy)dodecane, but now using 3-methyltetradecan-1-ol. In this way, the title compound (3.20, 64%) was obtained as a clear, colorless oil.

$^1\text{H}$  NMR (500 MHz,  $\text{CDCl}_3$ )  $\delta$  7.80 (d, 2H,  $J = 8.5$  Hz), 7.35 (d, 2H,  $J = 8.5$  Hz), 4.10-4.03 (m, 2H), 2.46 (s, 3H), 1.67 (pentet, 1H,  $J = 7.0$  Hz), 1.52-1.39 (m, 2H), 1.30-1.19 (m, 20H), 0.89 (t, 3H,  $J = 7.0$  Hz), 0.89 (d, 3H,  $J = 6.5$  Hz).

$^{13}\text{C}$  NMR (125 MHz,  $\text{CDCl}_3$ )  $\delta$  144.7, 133.2, 129.8, 127.9, 69.1, 36.6, 35.7, 32.0, 29.9, 29.73, 29.70, 29.4, 29.2, 26.8, 22.7, 21.6, 19.2, 14.2.

FT-IR (neat) 2925, 2854, 1599, 1466, 1365, 1189, 1178, 1098, 945, 814  $\text{cm}^{-1}$ .

MS (ESI)  $m/z$  ( $\text{M}+\text{Na}^+$ ) calcd for  $\text{C}_{22}\text{H}_{38}\text{NaO}_3\text{S}$ : 405, found: 405.

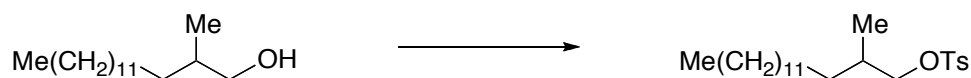

### 2-Methyl-1-(tosyloxy)pentadecane

2-Methyl-1-(tosyloxy)pentadecane was prepared in the same manner as described for the synthesis of 12-bromo-1-(tosyloxy)dodecane, but now using 2-methylpentadecan-1-ol. In this way, the title compound (2.10 g, 86%) was obtained as a clear, colorless oil.

$^1\text{H}$  NMR (500 MHz,  $\text{CDCl}_3$ )  $\delta$  7.79 (d, 2H,  $J = 8.5$  Hz), 7.35 (d, 2H,  $J = 8.5$  Hz), 3.87 (dd, 1H,  $J = 5.5, 9.5$  Hz), 3.80 (dd, 1H,  $J = 5.0, 10.0$  Hz), 2.45 (s, 3H), 1.76 (pentet, 1H,  $J = 6.5$  Hz) 1.26-1.07 (m, 24H), 0.90-0.87 (m, 6H).

$^{13}\text{C}$  NMR (125 MHz,  $\text{CDCl}_3$ )  $\delta$  144.7, 133.2, 129.8, 127.9, 75.2, 32.9, 32.7, 32.0, 29.77, 29.74, 29.69, 29.61, 29.4, 26.6, 22.8, 21.7, 16.5, 14.2.

FT-IR (neat) 2924, 2853, 1599, 1467, 1364, 1189, 1177, 1098, 968, 813  $\text{cm}^{-1}$ .

MS (EI)  $m/z$  ( $\text{M}-\text{OTs}^+$ ) calcd for  $\text{C}_{16}\text{H}_{33}$ : 225, found: 225.

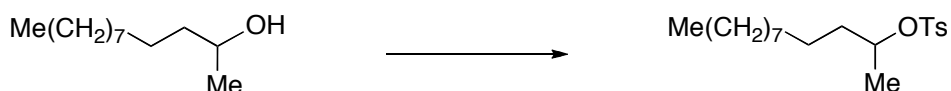

### 2-(Tosyloxy)dodecane

Tosyl chloride (1.90 g, 9.80 mmol) was added to a solution of 2-dodecanol (2.00 mL, 8.91 mmol), pyridine (2.50 mL, 17.8 mmol) in  $\text{CH}_2\text{Cl}_2$  (24 mL) at 0 °C. The mixture was allowed to slowly warm to r.t. After 16 h,  $\text{NaHCO}_3$  (saturated aqueous solution; 10 mL) was added, the phases were separated, and the aqueous layer was extracted with  $\text{CH}_2\text{Cl}_2$  (1 x 20 mL). The combined organic phases were dried ( $\text{MgSO}_4$ ), filtered, and concentrated under reduced pressure. The resulting residue was subjected to flash chromatography (silica; 2% EtOAc/hexane), which provided the title compound (2.50 g, 77%) as a colorless solid.

$^1\text{H}$  NMR (500 MHz,  $\text{CDCl}_3$ )  $\delta$  7.80 (d, 2H,  $J = 8.5$  Hz), 7.33 (d, 2H,  $J = 8.5$  Hz), 4.60 (sextet, 1H,  $J = 6.0$  Hz), 2.45 (s, 3H), 1.64-1.56 (m, 1H), 1.48-1.45 (m, 1H), 1.31-1.16 (m, 19H), 0.88 (t, 3H,  $J = 7.0$  Hz).

$^{13}\text{C}$  NMR (125 MHz,  $\text{CDCl}_3$ )  $\delta$  144.3, 134.5, 129.6, 127.6, 80.5, 36.4, 31.8, 29.5, 29.4, 29.34, 29.26, 29.1, 24.8, 22.6, 21.5, 20.8, 14.0.

FT-IR (neat) 2926, 2855, 2361, 1599, 1496, 1466, 1364, 1177, 1098, 912, 815  $\text{cm}^{-1}$ .

MS (ESI)  $m/z$  ( $\text{M}+\text{NH}_4^+$ ) calcd for  $\text{C}_{19}\text{H}_{36}\text{NO}_3\text{S}$ : 358, found: 358.

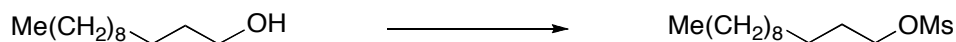

### 1-(Mesyloxy)dodecane

Mesy chloride (2.07 mL, 26.8 mmol) was added to a solution of dodecan-1-ol (3.00 mL, 13.4 mmol),  $\text{Et}_3\text{N}$  (5.60 mL, 40.2 mmol), and DMAP (40 mg, 0.33 mmol) in  $\text{CH}_2\text{Cl}_2$  (30 mL) at 0 °C. The mixture was allowed to slowly warm to r.t. After 16 h,  $\text{NaHCO}_3$  (saturated aqueous solution; 10 mL) was added, the phases were separated, and the aqueous layer was extracted with  $\text{CH}_2\text{Cl}_2$  (2 x 20 mL). The combined organic phases were dried ( $\text{MgSO}_4$ ), filtered, and concentrated under reduced pressure. The resulting residue was subjected to flash

chromatography (silica; 5% EtOAc/hexane), which provided the title compound (3.25 g, 92%) as a colorless solid.

$^1\text{H}$  NMR (500 MHz,  $\text{CDCl}_3$ )  $\delta$  4.22 (t, 2H,  $J = 7.0$  Hz), 3.00 (s, 3H), 1.74 (pentet, 2H,  $J = 7.0$  Hz), 1.41-1.26 (m, 18H), 0.88 (t, 3H,  $J = 7.0$  Hz).

$^{13}\text{C}$  NMR (125 MHz,  $\text{CDCl}_3$ )  $\delta$  70.3, 37.3, 32.0, 29.7, 29.6, 29.5, 29.4, 29.2, 29.1, 25.5, 22.7, 14.2.

FT-IR (neat) 3034, 2921, 2853, 1473, 1343, 1329, 1169, 984, 948  $\text{cm}^{-1}$ .

MS (ESI)  $m/z$  ( $\text{M}+\text{Na}^+$ ) calcd for  $\text{C}_{13}\text{H}_{28}\text{NaO}_3\text{S}$ : 287, found: 287.

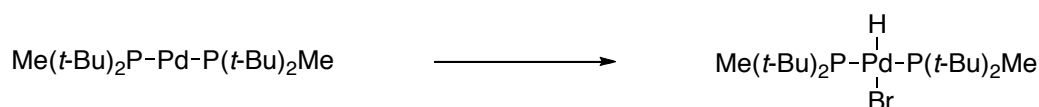

### *trans*-Pd(P(*t*-Bu)<sub>2</sub>Me)<sub>2</sub>HBr

In a nitrogen-filled glovebox, 1-bromohexane (74  $\mu\text{L}$ , 0.53 mmol) was added to an oven-dried 20-mL vial containing a solution of Pd(P(*t*-Bu)<sub>2</sub>Me)<sub>2</sub> (205 mg, 0.48 mmol) in Et<sub>2</sub>O (2 mL). The vial was capped, the joint was wrapped with electrical tape, and the vial was removed from the glovebox. After 16 h of stirring at r.t., the mixture was filtered through a Büchner funnel, and the solids thus retained were washed with pentane (10 mL). The filtrate was concentrated, pentane (10 mL) was added, and the resulting mixture was filtered through a Büchner funnel once more. The solids were combined and dried under reduced pressure to provide the title compound (170 mg, 70%) as a yellow solid.

$^1\text{H}$  NMR (300 MHz, THF- $d_8$ )  $\delta$  1.63 (t, 6H,  $J = 2.5$  Hz), 1.27 (t, 36H,  $J = 8.0$  Hz), -12.71 (t, 1H,  $J = 6.5$  Hz).

$^{13}\text{C}$  NMR (125 MHz, dioxane- $d_8$ )  $\delta$  33.6 (t,  $J = 10$  Hz), 29.3 (t,  $J = 3$  Hz), 6.2 (t,  $J = 10$  Hz).

$^{31}\text{P}$  NMR (128 MHz, THF- $d_8$ )  $\delta$  53.5.

FT-IR (neat) 2941, 2032, 1465, 1388, 1362, 1290, 1181, 1020, 871, 814  $\text{cm}^{-1}$ .

MS (FAB)  $m/z$  ( $\text{M}-\text{HBr}^+$ ) calcd for  $\text{C}_{18}\text{H}_{42}\text{P}_2\text{Pd}$ : 426.1797, found: 426.1795.

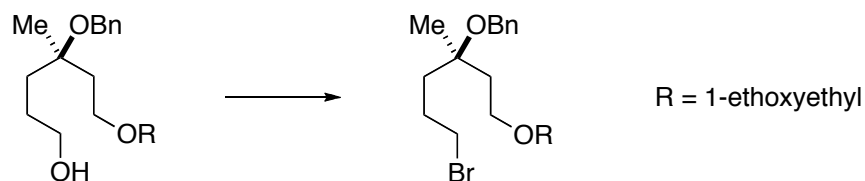

### (*R*)-{[(6-Bromo-1-(1-ethoxyethoxy)-3-methylhexan-3-yl)oxy]methyl}benzene

A solution of  $\text{PPh}_3\text{Br}_2$  in  $\text{CH}_2\text{Cl}_2$  (10 mL) was added dropwise to a solution of (*R*)-4-(benzyloxy)-6-(1-ethoxyethoxy)-4-methylhexan-1-ol<sup>3</sup> (210 mg, 0.68 mmol), imidazole (129 mg, 1.90 mmol), pyridine (0.15 mL, 1.9 mmol), and Et<sub>3</sub>N (0.40 mL, 2.8 mmol) in  $\text{CH}_2\text{Cl}_2$  (150 mL) at 0 °C. The mixture was allowed to slowly warm to r.t. After 16 h, Na<sub>2</sub>S<sub>2</sub>O<sub>3</sub> (saturated aqueous solution; 5 mL) and NaHCO<sub>3</sub> (saturated aqueous solution; 5 mL) were added, the phases were separated, and the aqueous layer was extracted with  $\text{CH}_2\text{Cl}_2$  (2 x 10 mL). The combined organic

(3) Ray, N. C.; Raveendranath, P. C.; Spencer, T. A. *Tetrahedron* **1992**, *48*, 9427–9432.

phases were dried ( $\text{MgSO}_4$ ), filtered, and concentrated under reduced pressure. The resulting residue was subjected to flash chromatography (silica; 95:5:1 *v/v/v* hexane/EtOAc/ $\text{Et}_3\text{N}$ ), which provided the title compound (216 mg, 86%) as a clear, light-yellow oil.

$^1\text{H}$  NMR (500 MHz,  $\text{C}_6\text{D}_6$ )  $\delta$  7.30 (d, 2H,  $J = 8.5$  Hz), 7.17 (t, 2H,  $J = 7.5$  Hz), 7.07 (t, 1H,  $J = 7.5$  Hz), 4.54 (q, 1H,  $J = 5.0$  Hz), 4.18 (s, 2H), 3.71 (q, 1H,  $J = 6.0$  Hz), 3.51-3.47 (m, 2H), 3.40-3.22 (m, 1H), 2.93 (t, 2H,  $J = 6.5$  Hz), 1.85-1.71 (m, 2H), 1.68-1.62 (m, 2H), 1.52-1.36 (m, 2H), 1.24 (d, 3H,  $J = 5.0$  Hz), 1.09 (t, 3H,  $J = 7.5$  Hz), 0.99 (s, 3H).

$^{13}\text{C}$  NMR (125 MHz,  $\text{C}_6\text{D}_6$ )  $\delta$  140.1, 128.5, 127.5, 127.3, 99.8, 75.7, 63.4, 61.2, 60.52, 60.50, 38.3, 37.37, 37.32, 34.7, 27.4, 23.64, 23.59, 20.1, 15.7.

FT-IR (neat) 2974, 2921, 2934, 2361, 2341, 1455, 1380, 1131, 1088, 1059  $\text{cm}^{-1}$ .

MS (EI)  $m/z$  ( $\text{M}-\text{C}_4\text{H}_9\text{O}^+$ ) calcd for  $\text{C}_{14}\text{H}_{20}\text{BrO}_2$ : 299, found: 299.

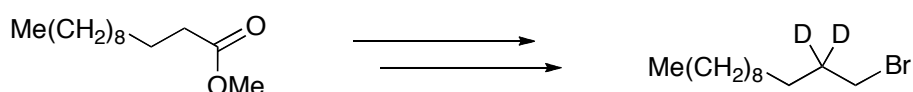

### 1-Bromo-2,2-dideuterododecane

A solution of methyl dodecanoate (1.80 g, 8.40 mmol) in MeOD (8 mL) was added to a mixture of NaOMe (1.00 g, 18.5 mmol) in MeOD (8 mL), and the resulting mixture was heated at reflux. After 90 h, the mixture was allowed to cool to r.t.,  $\text{D}_2\text{O}$  (2 mL) was added, and the resulting mixture was filtered through a short pad of silica ( $\text{Et}_2\text{O}$  elution), which provided methyl 2,2-dideuterododecanoate, which was used without purification in the next reaction.

A solution of methyl 2,2-dideuterododecanoate in  $\text{Et}_2\text{O}$  (10 mL) was added dropwise to a suspension of  $\text{LiAlH}_4$  (450 mg, 11.6 mmol) in  $\text{Et}_2\text{O}$  (15 mL) at 0 °C. The resulting mixture was allowed to slowly warm to r.t. After 16 h, the reaction mixture was cooled to 0 °C, and  $\text{Et}_2\text{O}$  (50 mL),  $\text{H}_2\text{O}$  (0.45 mL), NaOH (6 M aqueous solution; 0.45 mL), and  $\text{H}_2\text{O}$  (1.35 mL) were added in this order. The resulting mixture was warmed to r.t., maintained at this temperature for 15 min, and then dried ( $\text{MgSO}_4$ ). After 15 min, the reaction mixture was filtered, and the solids thus retained were washed with  $\text{CH}_2\text{Cl}_2$  (50 mL). The combined filtrates were concentrated under reduced pressure to afford 2,2-dideuterododecan-1-ol, which was used without purification in the next reaction.

Mesylyl chloride (0.42 mL, 5.4 mmol) was added to a solution of 2,2-dideuterododecan-1-ol (840 mg, 4.46 mmol),  $\text{Et}_3\text{N}$  (1.25 mL, 8.92 mmol), and DMAP (110 mg, 0.89 mmol) in  $\text{CH}_2\text{Cl}_2$  (20 mL) at 0 °C. The mixture was allowed to slowly warm to r.t. After 16 h,  $\text{NaHCO}_3$  (saturated aqueous solution; 10 mL) was added, the phases were separated, and the aqueous layer was extracted with  $\text{CH}_2\text{Cl}_2$  (2 x 10 mL). The combined organic phases were then dried ( $\text{MgSO}_4$ ), filtered, and concentrated under reduced pressure to provide 1-(mesyloxy)-2,2-dideuterododecane, which was used without purification in the next reaction.

$\text{LiBr}$  (775 mg, 8.92 mmol) was added to a solution of 1-(mesyloxy)-2,2-dideuterododecane in acetone (15 mL), and the resulting mixture was heated at reflux. After 16 h, the mixture was allowed to cool to r.t., and it was filtered through a short pad of silica (hexane). The resulting residue was then subjected to flash chromatography (silica; hexane), which provided the title compound (500 mg, 24% over 4 steps from methyl dodecanoate) as a clear, colorless oil.

$^1\text{H}$  NMR (500 MHz,  $\text{CDCl}_3$ )  $\delta$  3.40 (s, 2H), 1.48-1.20 (m, 18H), 0.88 (t, 3H,  $J = 7.0$  Hz).

$^{13}\text{C}$  NMR (125 MHz,  $\text{CDCl}_3$ )  $\delta$  34.0, 32.1, 29.8, 29.7, 29.6, 29.5, 28.9, 28.2, 22.8, 14.3.

FT-IR (neat) 2924, 2854, 2361, 2341, 1457, 1238  $\text{cm}^{-1}$ .  
MS (EI)  $m/z$  ( $\text{M}^+$ ) calcd for  $\text{C}_{12}\text{H}_{23}\text{D}_2\text{Br}$ : 250, found: 250.

### III. Palladium-Catalyzed Dehydrohalogenation Reactions

**General Procedure (alkyl bromides)** (conducted in a glovebox; however, see the next procedure). Outside of a glovebox, the alkyl bromide (0.60 mmol) was added to an oven-dried 4-mL vial (containing a stir bar). This vial was then transferred into a glovebox, where dioxane (520  $\mu\text{L}$ ),  $\text{Cy}_2\text{NH}$  (140  $\mu\text{L}$ , 0.72 mmol),  $\text{KO}t\text{-Bu}$  (480  $\mu\text{L}$  of a 125 mM solution in dioxane; 60  $\mu\text{mol}$ ), and  $\text{Pd}(\text{P}(t\text{-Bu})_2\text{Me})_2$  (the specified amount, in 200  $\mu\text{L}$  of dioxane) were added in turn. The vial was then capped, the joint was wrapped with electrical tape, and the vial was removed from the glovebox. The reaction mixture was stirred at r.t. for 24 h, and then it was filtered through silica (~3 cm height, contained in a sintered glass funnel (1.5 cm diameter)), and the silica was washed with 5%  $\text{Et}_2\text{O}$ /pentane (50 mL). The filtrate was then concentrated under reduced pressure, and the residue was purified by chromatography.

Notes: (a) Although a reaction time of 24 h is employed in the General Procedure, in most cases the reaction is essentially complete within 8–10 h. (b) In order to remove a yellow impurity that is not visible by  $^1\text{H}$ ,  $^{13}\text{C}$ , or  $^{31}\text{P}$  NMR spectroscopy, reverse-phase chromatography was used to purify certain reaction products. Alternatively, this unidentified impurity can easily be removed by passing the product obtained by normal-phase flash chromatography through a short pad of  $\text{AgNO}_3$ -impregnated silica gel (25% by weight).

**Procedure (alkyl bromides)** (without a glovebox).  $\text{Pd}_2(\text{dba})_3$  (19.2 mg, 21  $\mu\text{mol}$ ),  $[\text{HP}(t\text{-Bu})_2\text{Me}]\text{BF}_4$  (20.9 mg, 84  $\mu\text{mol}$ ), and a stir bar were added to an oven-dried 25-mL flask. A rubber septum was fitted to the flask, which was then evacuated and backfilled with argon (3 cycles). The flask was detached from the argon line, and  $\text{KO}t\text{-Bu}$  (1.20 mL of a 125 mM solution in dioxane; 0.15 mmol) and  $\text{Cy}_2\text{NH}$  (140  $\mu\text{L}$ , 0.72 mmol) were added in turn via syringe. The puncture holes of the septum were then covered with vacuum grease, and the mixture was stirred at r.t. for 2 h. The vacuum grease was then wiped off, 1-bromododecane (150 mg, 0.60 mmol) was added via syringe, and the puncture holes of the septum were covered with vacuum grease. The reaction mixture was stirred for 24 h, and then it was filtered through silica (~3 cm height, contained in a sintered glass funnel (1.5 cm diameter)), and the silica was washed with 5%  $\text{Et}_2\text{O}$ /pentane (50 mL). The filtrate was then concentrated under reduced pressure, and the residue was purified by chromatography (100% pentane), which afforded 1-dodecene as a clear, colorless oil. First run: 97 mg (96%). Second run (6.0 mmol scale): 902 mg (89%). The product was identical to authentic material (Aldrich) by  $^1\text{H}$  NMR spectroscopy,  $^{13}\text{C}$  NMR spectroscopy, and GC analysis.

Notes: (a) Stirring  $\text{Pd}_2(\text{dba})_3$  and  $[\text{HP}(t\text{-Bu})_2\text{Me}]\text{BF}_4$  in the presence of  $\text{Cy}_2\text{NH}$  and  $\text{KO}t\text{-Bu}$  for 2 h prior to the addition of 1-dodecene is required in order to achieve full conversion. (b) When the reaction is performed under a nitrogen atmosphere, the dehydrohalogenation proceeds in ~90% yield. Thus, the use of argon and the scrupulous removal of air from the reaction vessel is important for optimal and reproducible results, particularly for small-scale reactions.

**General Procedure (alkyl sulfonates)** (conducted in a glovebox). Outside of a glovebox, the alkyl sulfonate (0.60 mmol) was added to an oven-dried 4-mL vial (containing a stir bar). This

vial was then transferred into a glovebox, where TMP (122  $\mu$ L, 0.72 mmol), LiOMe (the specified volume of a 125 mM solution in dioxane), and Pd(P(*t*-Bu)<sub>2</sub>Me)<sub>2</sub> (the specified amount, in the amount of dioxane that generates a 0.50 M solution) were added in turn. The vial was then capped, the joint was wrapped with electrical tape, and the vial was removed from the glovebox. The reaction mixture was stirred at the specified temperature for the specified time, and then it was filtered through silica (~3 cm height, contained in a sintered glass funnel (1.5 cm diameter)), and the silica was washed with pentane (50 mL). The filtrate was then concentrated under reduced pressure, and the residue was purified by chromatography (pentane).

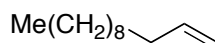

### 1-Dodecene [112-41-4] (Table 2, entry 1)

Pd(P(*t*-Bu)<sub>2</sub>Me)<sub>2</sub> (15.4 mg, 36  $\mu$ mol, 6.0 mol%). The product was purified by flash chromatography on silica gel (100% pentane). Clear, colorless oil. First run: 91 mg (90%). Second run: 98 mg (97%). This product was identical to authentic material (Aldrich) by <sup>1</sup>H NMR spectroscopy, <sup>13</sup>C NMR spectroscopy, and GC analysis.

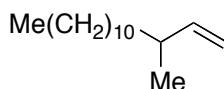

### 3-Methyltetradec-1-ene (Table 2, entry 2)

Pd(P(*t*-Bu)<sub>2</sub>Me)<sub>2</sub> (34.6 mg, 81  $\mu$ mol, 13.5 mol%). The product was purified by flash chromatography on silica gel (100% pentane). Clear, colorless oil. First run: 125 mg (99%). Second run: 124 mg (98%).

<sup>1</sup>H NMR (500 MHz, CDCl<sub>3</sub>)  $\delta$  5.60 (ddd, 1H, *J* = 7.5, 10.0, 17.5 Hz), 4.96 (ddd, 1H, *J* = 1.0, 2.0, 18.0 Hz), 4.90 (ddd, 1H, *J* = 1.0, 2.0, 10.0 Hz), 2.16-2.06 (m, 1H), 1.26 (br, 20H), 0.97 (d, 3H, *J* = 7.0 Hz), 0.88 (t, 3H, *J* = 7.0 Hz).

<sup>13</sup>C NMR (125 MHz, CDCl<sub>3</sub>)  $\delta$  145.1, 112.4, 38.0, 36.9, 32.2, 30.0, 29.93, 29.91, 29.6, 27.5, 22.9, 20.4, 14.3.

FT-IR (neat) 2925, 2854, 1640, 1496, 910 cm<sup>-1</sup>.

MS (EI) *m/z* (M<sup>+</sup>) calcd for C<sub>15</sub>H<sub>30</sub>: 210, found: 210.

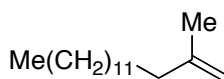

### 2-Methylpentadec-1-ene (Table 2, entry 3)

Pd(P(*t*-Bu)<sub>2</sub>Me)<sub>2</sub> (76.8 mg, 0.18 mmol, 30 mol%). The product was purified by flash chromatography on silica gel (100% pentane). Clear, colorless oil. First run: 133 mg (99%). Second run: 133 mg (99%).

<sup>1</sup>H NMR (500 MHz, CDCl<sub>3</sub>)  $\delta$  4.77 (d, 2H, *J* = 11.0 Hz), 2.00 (t, 2H, *J* = 7.5 Hz), 1.72 (s, 3H), 1.46-1.38 (m, 2H), 1.34-1.24 (m, 20H), 0.89 (t, 3H, *J* = 7.5 Hz).

<sup>13</sup>C NMR (125 MHz, CDCl<sub>3</sub>)  $\delta$  146.5, 109.7, 38.0, 32.1, 29.88, 29.85, 29.84, 29.75, 29.6, 27.8, 22.9,



22.6, 14.3.

FT-IR (neat) 2925, 2854, 1652, 1457, 886,  $\text{cm}^{-1}$ .

MS (EI)  $m/z$  ( $\text{M}^+$ ) calcd for  $\text{C}_{16}\text{H}_{32}$ : 224, found: 224.

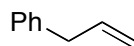

**Allylbenzene [300-57-2] (Table 2, entry 4)**

$\text{Pd}(\text{P}(t\text{-Bu})_2\text{Me})_2$  (21.8 mg, 51  $\mu\text{mol}$ , 8.5 mol%). First run: 100% calibrated GC yield (*n*-decane used as an internal standard). Second run: 100% calibrated GC yield (*n*-decane used as an internal standard). This product was identical to authentic material (Aldrich) by  $^1\text{H}$  NMR spectroscopy,  $^{13}\text{C}$  NMR spectroscopy, and GC analysis.

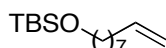

**1-(*tert*-Butyldimethylsilyloxy)non-8-ene (Table 2, entry 5)**

$\text{Pd}(\text{P}(t\text{-Bu})_2\text{Me})_2$  (20.5 mg, 48  $\mu\text{mol}$ , 8.0 mol%). The product was purified by reverse-phase chromatography (10% MeCN/ $\text{H}_2\text{O}$   $\rightarrow$  MeCN). Clear, colorless oil. First run: 138 mg (90%). Second run: 133 mg (86%).

$^1\text{H}$  NMR (500 MHz,  $\text{CDCl}_3$ )  $\delta$  5.81 (ddt, 1H,  $J = 6.5, 10.0, 17.0$  Hz), 5.00 (d, 1H,  $J = 17.0$  Hz), 4.93 (d, 1H,  $J = 10.0$  Hz), 3.60 (t, 2H,  $J = 6.5$  Hz), 2.04 (q, 2H,  $J = 6.5$  Hz), 1.56-1.46 (m, 2H), 1.44-1.22 (m, 8H), 0.90 (s, 9H), 0.05 (s, 6H).

$^{13}\text{C}$  NMR (125 MHz,  $\text{CDCl}_3$ )  $\delta$  139.2, 114.3, 63.4, 33.4, 33.0, 29.5, 29.3, 29.1, 26.1, 25.9, 18.5, -5.1.

FT-IR (neat) 2929, 2857, 1472, 1255, 1102, 836, 775  $\text{cm}^{-1}$ .

MS (EI)  $m/z$  ( $\text{M}-\text{Me}^+$ ) calcd for  $\text{C}_{14}\text{H}_{29}\text{OSi}$ : 241, found: 241.

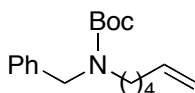

***tert*-Butyl-*N*-benzyl(hex-5-en-1-yl)carbamate (Table 2, entry 6)**

$\text{Pd}(\text{P}(t\text{-Bu})_2\text{Me})_2$  (20.5 mg, 48  $\mu\text{mol}$ , 8.0 mol%). The product was purified by reverse-phase chromatography (10% MeCN/ $\text{H}_2\text{O}$   $\rightarrow$  MeCN). Clear, colorless oil. First run: 168 mg (97%). Second run: 170 mg (98%).

$^1\text{H}$  NMR (500 MHz,  $\text{CDCl}_3$ )  $\delta$  7.34-7.16 (m, 5H), 5.81-5.73 (m, 1H), 4.99 (d, 1H,  $J = 17.0$  Hz), 4.94 (d, 1H,  $J = 10.5$  Hz), 4.42 (br s, 2H), 3.22 (br s, 1H), 3.13 (br s, 1H), 2.04 (br s, 2H), 1.58-1.26 (m, 4H), 1.50 (br s, 9/2H), 1.48 (br s, 9/2H).

$^{13}\text{C}$  NMR (125 MHz,  $\text{CDCl}_3$ )  $\delta$  156.0, 138.6, 128.4, 127.7, 127.1, 114.6, 79.5, 50.5, 49.9, 46.4, 33.4, 28.5, 27.5, 26.1.

FT-IR (neat) 2976, 2931, 1695, 1455, 1416, 1366, 1250, 1170, 910, 881  $\text{cm}^{-1}$ .

MS (EI)  $m/z$  ( $\text{M}^+$ ) calcd for  $\text{C}_{18}\text{H}_{27}\text{NO}_2$ : 289, found: 289.

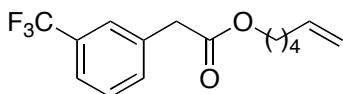

**Hex-5-en-1-yl 2-(3-(trifluoromethyl)phenyl)acetate (Table 2, entry 7)**

Pd(P(*t*-Bu)<sub>2</sub>Me)<sub>2</sub> (19.2 mg, 45 μmol, 7.5 mol%). The product was purified by reverse-phase chromatography (10% MeCN/H<sub>2</sub>O → MeCN). Clear, colorless oil. First run: 146 mg (84%). Second run: 151 mg (88%).

<sup>1</sup>H NMR (500 MHz, CDCl<sub>3</sub>) δ 7.56-7.48 (m, 4H), 5.77 (ddt, 1H, *J* = 7.0, 13.5, 17.0 Hz), 5.02-4.95 (m, 2H), 4.12 (t, 2H, *J* = 7.5 Hz), 3.68 (s, 2H), 2.06 (q, 2H, *J* = 7.5 Hz), 1.65 (pentet, 2H, *J* = 7.5 Hz), 1.42 (pentet, 2H, *J* = 7.5 Hz).

<sup>13</sup>C NMR (125 MHz, CDCl<sub>3</sub>) δ 171.0, 138.3, 135.1, 132.8, 131.0 (q, *J* = 32 Hz), 129.1, 126.2 (q, *J* = 4 Hz), 124.2 (q, *J* = 271 Hz), 124.1 (q, *J* = 4 Hz), 115.0, 65.2, 41.2, 33.3, 28.0, 25.2.

FT-IR (neat) 2939, 1738, 1453, 1332, 1165, 1126, 1077, 914, 701 cm<sup>-1</sup>.

MS (EI) *m/z* (M<sup>+</sup>) calcd for C<sub>15</sub>H<sub>17</sub>F<sub>3</sub>O<sub>2</sub>: 286, found: 286.

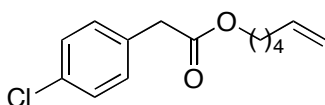

**Hex-5-en-1-yl 2-(4-chlorophenyl)acetate (Table 2, entry 8)**

Pd(P(*t*-Bu)<sub>2</sub>Me)<sub>2</sub> (12.8 mg, 30 μmol, 5.0 mol%). The product was purified by reverse-phase chromatography (10% MeCN/H<sub>2</sub>O → MeCN). Clear, colorless oil. First run: 137 mg (90%). Second run: 140 mg (92%).

<sup>1</sup>H NMR (500 MHz, CDCl<sub>3</sub>) δ 7.29 (d, 2H, *J* = 14.0 Hz), 7.21 (d, 2H, *J* = 14.0 Hz), 5.77 (ddt, 1H, *J* = 11.0, 16.5, 21.5 Hz), 5.03-4.94 (m, 2H), 4.09 (t, 2H, *J* = 16.5 Hz), 3.58 (s, 2H), 2.05 (q, 2H, *J* = 12.0 Hz), 1.62 (pentet, 2H, *J* = 12.0 Hz), 1.41 (pentet, 2H, *J* = 12.0 Hz).

<sup>13</sup>C NMR (125 MHz, CDCl<sub>3</sub>) δ 171.1, 138.2, 133.0, 132.6, 130.6, 128.7, 114.9, 64.9, 40.7, 33.2, 28.0, 25.1.

FT-IR (neat) 2938, 1737, 1493, 1359, 1251, 1159, 1091 cm<sup>-1</sup>.

MS (EI) *m/z* (M<sup>+</sup>) calcd for C<sub>14</sub>H<sub>17</sub>ClO<sub>2</sub>: 252, found: 252.

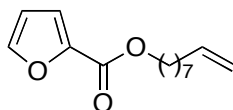

**Non-8-en-1-yl furan-2-carboxylate (Table 2, entry 9)**

Pd(P(*t*-Bu)<sub>2</sub>Me)<sub>2</sub> (19.2 mg, 45 μmol, 7.5 mol%). The product was purified by reverse-phase chromatography (10% MeCN/H<sub>2</sub>O → MeCN). Clear, yellow oil. First run: 126 mg (89%). Second run: 119 mg (84%).

<sup>1</sup>H NMR (500 MHz, C<sub>6</sub>D<sub>6</sub>) δ 7.02 (s, 1H), 6.90 (s, 1H), 5.85 (s, 1H), 5.82-5.72 (m, 1H), 5.04 (d, 1H, *J* = 17.0 Hz), 5.00 (d, 1H, *J* = 10.0 Hz), 4.14 (t, 2H, *J* = 7.0 Hz), 1.94 (pentet, 2H, *J* = 7.0 Hz), 1.47 (pentet, 2H, *J* = 7.0 Hz), 1.24 (pentet, 2H, *J* = 7.0 Hz), 1.19-1.09 (m, 6H).

<sup>13</sup>C NMR (125 MHz, C<sub>6</sub>D<sub>6</sub>) δ 158.6, 146.1, 145.7, 139.2, 117.7, 114.6, 111.8, 64.9, 34.2, 29.4, 29.3, 29.2, 29.0, 26.2.

FT-IR (neat) 2929, 2856, 1732, 1581, 1475, 1399, 1296, 1180, 1119, 763  $\text{cm}^{-1}$ .

MS (EI)  $m/z$  ( $\text{M}^+$ ) calcd for  $\text{C}_{14}\text{H}_{20}\text{O}_3$ : 236, found: 236.

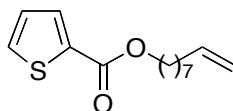

### Non-8-en-1-yl thiophene-2-carboxylate (Table 2, entry 10)

$\text{Pd}(\text{P}(t\text{-Bu})_2\text{Me})_2$  (19.2 mg, 45  $\mu\text{mol}$ , 7.5 mol%). The product was purified by reverse-phase chromatography (10% MeCN/ $\text{H}_2\text{O}$   $\rightarrow$  MeCN). Clear, light-yellow oil. First run: 146 mg (96%). Second run: 146 mg (96%).

$^1\text{H}$  NMR (500 MHz,  $\text{C}_6\text{D}_6$ )  $\delta$  7.74 (d, 1H,  $J = 3.5$  Hz), 6.74 (s, 1H), 6.51 (d, 1H,  $J = 3.5$  Hz), 5.74 (ddt, 1H,  $J = 5.0, 6.5, 17.0$  Hz), 5.02 (ddd, 1H,  $J = 1.0, 1.5, 17.0$  Hz), 4.96 (ddd, 1H,  $J = 1.0, 1.5, 6.5$  Hz), 4.10 (t, 2H,  $J = 7.0$  Hz), 1.91 (pentet, 2H,  $J = 7.0$  Hz), 1.42 (pentet, 2H,  $J = 7.0$  Hz), 1.22 (pentet, 2H,  $J = 7.0$  Hz), 1.15-1.04 (m, 6H).

$^{13}\text{C}$  NMR (125 MHz,  $\text{C}_6\text{D}_6$ )  $\delta$  162.0, 139.2, 134.8, 133.4, 132.1, 127.8, 114.6, 65.2, 34.2, 29.4, 29.3, 29.2, 29.0, 26.2.

FT-IR (neat) 2928, 2856, 1713, 1526, 1420, 1359, 1094  $\text{cm}^{-1}$ .

MS (ESI)  $m/z$  ( $\text{M}+\text{Na}^+$ ) calcd for  $\text{C}_{14}\text{H}_{20}\text{NaO}_2\text{S}$ : 275, found: 275.

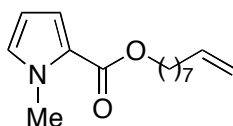

### Non-8-en-1-yl N-methylpyrrole-2-carboxylate (Table 2, entry 11)

$\text{Pd}(\text{P}(t\text{-Bu})_2\text{Me})_2$  (19.2 mg, 45  $\mu\text{mol}$ , 7.5 mol%). For this dehydrobromination, 2.5 mol%  $\text{KO}t\text{-Bu}$  (120  $\mu\text{L}$  of a 125 mM solution in dioxane; 15  $\mu\text{mol}$ ) was used. The product was purified by reverse-phase chromatography (10% MeCN/ $\text{H}_2\text{O}$   $\rightarrow$  MeCN). Clear, colorless oil. First run: 137 mg (92%). Second run: 139 mg (93%). Olefin isomerization was observed (17:1 ratio of terminal to internal alkenes, as determined by  $^1\text{H}$  NMR spectroscopy).

$^1\text{H}$  NMR (500 MHz,  $\text{CDCl}_3$ )  $\delta$  6.94 (d, 1H,  $J = 1.5, 4.0$  Hz), 6.78 (s, 1H), 6.12-6.11 (m, 1H), 5.81 (ddt, 1H,  $J = 6.5, 10.0, 17.0$  Hz), 5.00 (ddd, 1H,  $J = 1.5, 1.5, 17.0$  Hz), 4.94 (ddd, 1H,  $J = 0.5, 1.0, 10.0$  Hz), 4.22 (t, 2H,  $J = 6.5$  Hz), 3.93 (s, 3H), 2.05 (q, 2H,  $J = 6.5$  Hz), 1.72 (pentet, 2H,  $J = 7.0$  Hz), 1.43-1.32 (m, 8H).

$^{13}\text{C}$  NMR (125 MHz,  $\text{CDCl}_3$ )  $\delta$  161.5, 139.1, 129.4, 122.7, 117.7, 114.3, 107.8, 63.9, 36.9, 33.8, 29.2, 29.1, 28.9, 26.1.

FT-IR (neat) 3076, 2929, 2856, 1705, 1641, 1532, 1468, 1415, 1321, 1247, 1116, 910, 736  $\text{cm}^{-1}$ .

MS (EI)  $m/z$  ( $\text{M}^+$ ) calcd for  $\text{C}_{15}\text{H}_{23}\text{NO}_2$ : 249, found: 249.

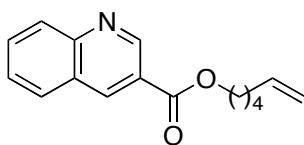

### Hex-5-en-1-yl quinoline-3-carboxylate (Table 2, entry 12)

Pd(P(*t*-Bu)<sub>2</sub>Me)<sub>2</sub> (30.7 mg, 72 μmol, 12 mol%). The product was purified by reverse-phase chromatography (10% MeCN/H<sub>2</sub>O → MeCN). Clear, yellow oil. First run: 149 mg (97%). Second run: 147 mg (96%).

<sup>1</sup>H NMR (500 MHz, C<sub>6</sub>D<sub>6</sub>) δ 9.73 (d, 1H, *J* = 2.0 Hz), 8.64 (d, 1H, *J* = 2.0 Hz), 8.22 (d, 1H, *J* = 8.5 Hz), 7.30-7.26 (m, 2H), 7.04 (td, 1H, *J* = 1.0, 8.5 Hz), 5.64 (ddt, 1H, *J* = 7.0, 10.5, 17.0 Hz), 4.98-4.92 (m, 2H), 4.11 (t, 2H, *J* = 6.5 Hz), 1.87-1.82 (m, 2H), 1.46-1.41 (m, 2H), 1.28-1.19 (m, 2H).

<sup>13</sup>C NMR (125 MHz, C<sub>6</sub>D<sub>6</sub>) δ 165.2, 150.5, 150.4, 138.5, 138.4, 131.6, 130.1, 129.2, 127.2, 127.1, 123.7, 115.1, 65.2, 33.6, 28.4, 25.5.

FT-IR (neat) 3411, 2934, 1721, 1620, 1286, 1238, 790, 769 cm<sup>-1</sup>.

MS (EI) *m/z* (M<sup>+</sup>) calcd for C<sub>16</sub>H<sub>17</sub>NO<sub>2</sub>: 255, found: 255.

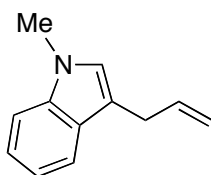

### 3-Allyl-N-methylindole (Table 2, entry 13)

Pd(P(*t*-Bu)<sub>2</sub>Me)<sub>2</sub> (17.9 mg, 42 μmol, 7.0 mol%). The product was purified by reverse-phase chromatography (10% MeCN/H<sub>2</sub>O → MeCN). Clear, light-yellow oil. First run: 88 mg (85%). Second run: 85 mg (83%).

<sup>1</sup>H NMR (500 MHz, CDCl<sub>3</sub>) δ 7.76 (dt, 1H, *J* = 1.5, 7.0 Hz), 7.44-7.24 (m, 3H), 6.95 (s, 1H), 6.23 (ddt, 1H, *J* = 11.0, 16.5, 27.5 Hz), 5.33 (ddd, 1H, *J* = 2.0, 2.5, 27.5 Hz), 5.23 (ddd, 1H, *J* = 2.0, 2.5, 16.5 Hz), 3.82 (s, 3H), 3.67 (d, 2H, *J* = 11.0 Hz).

<sup>13</sup>C NMR (125 MHz, CDCl<sub>3</sub>) δ 137.6, 137.2, 127.9, 126.6, 121.6, 119.3, 118.8, 115.1, 113.0, 109.3, 32.7, 29.9.

FT-IR (neat) 3056, 2912, 2361, 1637, 1473, 1424, 1374, 1328, 911, 738 cm<sup>-1</sup>.

MS (EI) *m/z* (M<sup>+</sup>) calcd for C<sub>12</sub>H<sub>13</sub>N: 171, found: 171.

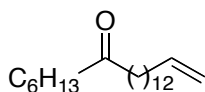

### Henicos-20-en-7-one (Table 2, entry 14)

Pd(P(*t*-Bu)<sub>2</sub>Me)<sub>2</sub> (38.4 mg, 90 μmol, 15 mol%). The product was purified by flash chromatography on silica gel (2% Et<sub>2</sub>O/pentane). The residue was then passed through a short pad of AgNO<sub>3</sub>-doped silica gel (25% by weight; 10% Et<sub>2</sub>O/pentane). Colorless solid. First run: 176 mg (95%). Second run: 167 mg (90%).

<sup>1</sup>H NMR (500 MHz, CDCl<sub>3</sub>) δ 5.81 (ddt, 1H, *J* = 6.5, 10.0, 17.0 Hz), 5.00 (ddd, 1H, *J* = 1.5, 1.5,

17.0 Hz), 4.93 (ddd, 1H,  $J = 1.0, 1.5, 10.0$  Hz), 2.38 (t, 4H,  $J = 7.0$  Hz), 2.04 (q, 2H,  $J = 7.0$  Hz), 1.56 (pentet, 4H,  $J = 6.5$  Hz), 1.26 (br s, 24H), 0.88 (t, 3H,  $J = 7.0$  Hz).

$^{13}\text{C}$  NMR (125 MHz,  $\text{CDCl}_3$ )  $\delta$  211.5, 139.2, 114.1, 42.8, 33.9, 31.7, 29.69, 29.67, 29.57, 29.55, 29.5, 29.3, 29.2, 29.0, 23.92, 23.88, 22.6, 14.1.

FT-IR (neat) 2917, 2849, 1705  $\text{cm}^{-1}$ .

MS (EI)  $m/z$  ( $\text{M}^+$ )  $m/z$  ( $\text{M}^+$ ) calcd for  $\text{C}_{21}\text{H}_{40}\text{O}$ : 308, found: 308.

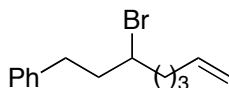

### (3-Bromo-oct-7-en-1-yl)benzene (Table 2, entry 15)

$\text{Pd}(\text{P}(t\text{-Bu})_2\text{Me})_2$  (30.7 mg, 72  $\mu\text{mol}$ , 12 mol%). For this dehydrobromination, 20 mol%  $\text{KO}t\text{-Bu}$  (960  $\mu\text{L}$  of a 125 mM solution in dioxane; 120  $\mu\text{mol}$ ) was used. The product was purified by reverse-phase chromatography (10%  $\text{MeCN}/\text{H}_2\text{O} \rightarrow \text{MeCN}$ ) twice. Clear, yellow oil. First run: 121 mg (75%). Second run: 128 mg (80%).

$^1\text{H}$  NMR (500 MHz,  $\text{CDCl}_3$ )  $\delta$  7.32-7.18 (m, 5H), 5.79 (ddt, 1H,  $J = 6.5, 10.0, 17.0$  Hz), 5.01 (d, 1H,  $J = 17.0$  Hz), 4.97 (d, 1H,  $J = 10.0$  Hz), 3.99 (septet, 1H,  $J = 4.5$  Hz), 2.94-2.88 (m, 1H), 2.79-2.73 (m, 1H), 2.19-2.02 (m, 4H), 1.92-1.80 (m, 2H), 1.71-1.62 (m, 1H), 1.56-1.48 (m, 1H).

$^{13}\text{C}$  NMR (125 MHz,  $\text{CDCl}_3$ )  $\delta$  141.1, 138.3, 128.63, 128.57, 126.2, 115.1, 57.5, 40.8, 38.7, 33.8, 33.2, 26.8.

FT-IR (neat) 3064, 3027, 2941, 2860, 1641, 1603, 1496, 1454, 1229, 993, 912, 749  $\text{cm}^{-1}$ .

MS (EI)  $m/z$  ( $\text{M}^+$ ) calcd for  $\text{C}_{14}\text{H}_{19}\text{Br}$ : 268, found: 268.

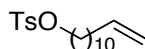

### 1-(Tosyloxy)dodec-11-ene (Table 2, entry 16)

$\text{Pd}(\text{P}(t\text{-Bu})_2\text{Me})_2$  (28.2 mg, 66  $\mu\text{mol}$ , 11 mol%). The product was purified by flash chromatography on silica gel (5%  $\text{EtOAc}/\text{hexane}$ ), followed by reverse-phase chromatography (10%  $\text{MeCN}/\text{H}_2\text{O} \rightarrow \text{MeCN}$ ). Clear, colorless solid. First run: 173 mg (85%). Second run: 178 mg (88%). Olefin isomerization was observed (6:1 ratio of terminal to internal alkenes, as determined by  $^1\text{H}$  NMR spectroscopy).

$^1\text{H}$  NMR (500 MHz,  $\text{CDCl}_3$ )  $\delta$  7.79 (d, 2H,  $J = 8.5$  Hz), 7.34 (d, 2H,  $J = 8.5$  Hz), 5.81 (ddt, 1H,  $J = 6.5, 10.0, 17.0$  Hz), 4.91 (d, 1H,  $J = 17.0$  Hz), 4.95 (d, 1H,  $J = 10.0$  Hz), 4.02 (t, 2H,  $J = 6.5$  Hz), 2.45 (s, 3H), 2.04 (pentet, 2H,  $J = 6.5$  Hz), 1.66-1.59 (m, 2H), 1.42-1.16 (m, 14H).

$^{13}\text{C}$  NMR (125 MHz,  $\text{CDCl}_3$ )  $\delta$  144.7, 139.2, 133.2, 129.9, 127.9, 114.2, 70.8, 33.8, 29.5, 29.4, 29.1, 28.9, 28.8, 25.3, 21.7.

FT-IR (neat) 3075, 2927, 2855, 1640, 1599, 1466, 1363, 1179, 1099, 959, 815  $\text{cm}^{-1}$ .

MS (ESI)  $m/z$  ( $\text{M}+\text{Na}^+$ ) calcd for  $\text{C}_{19}\text{H}_{30}\text{NaO}_3\text{S}$ : 361, found: 361.

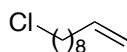

### 10-Chlorododec-1-ene (Table 2, entry 17)

$\text{Pd}(\text{P}(t\text{-Bu})_2\text{Me})_2$  (16.6 mg, 39  $\mu\text{mol}$ , 6.5 mol%). The product was purified by flash chromatography on silica gel (100% pentane). Clear, colorless oil. First run: 91 mg (87%). Second run: 95 mg (91%).

$^1\text{H}$  NMR (500 MHz,  $\text{CDCl}_3$ )  $\delta$  5.81 (ddt, 1H,  $J = 7.0, 10.0, 17.0$  Hz), 5.00 (ddd, 1H,  $J = 1.0, 1.5, 17.0$  Hz), 4.96 (ddd, 1H,  $J = 1.0, 1.0, 10.0$  Hz), 3.54 (t, 2H,  $J = 7.0$  Hz), 2.04 (q, 2H,  $J = 7.0$  Hz), 1.76 (pentet, 2H,  $J = 7.0$  Hz), 1.48-1.24 (m, 10H).

$^{13}\text{C}$  NMR (125 MHz,  $\text{CDCl}_3$ )  $\delta$  139.2, 114.3, 45.2, 33.9, 32.8, 29.4, 29.1, 28.99, 28.97, 27.0.

FT-IR (neat) 3077, 2928, 2856, 1641, 1463, 1310, 993, 910, 725  $\text{cm}^{-1}$ .

MS (EI)  $m/z$  ( $\text{M}^+$ ) calcd for  $\text{C}_{10}\text{H}_{19}\text{Cl}$ : 174, found: 174.

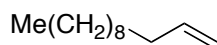

### 1-Dodecene [112-41-4] (Table 3, entry 1)

$\text{Pd}(\text{P}(t\text{-Bu})_2\text{Me})_2$  (15.4 mg, 36  $\mu\text{mol}$ , 6.0 mol%), LiOMe (288  $\mu\text{L}$  of a 125  $\mu\text{M}$  solution in dioxane; 6.0 mol%), 80  $^\circ\text{C}$  (8 h). The product was purified by flash chromatography on silica gel (100% pentane). Clear, colorless oil. First run: 99 mg (98%). Second run: 100 mg (99%). This product was identical to authentic material (Aldrich) by  $^1\text{H}$  NMR spectroscopy,  $^{13}\text{C}$  NMR spectroscopy, and GC analysis.

Olefin isomerization was observed (18:1 ratio of terminal to internal alkenes, as determined by  $^1\text{H}$  NMR spectroscopy).

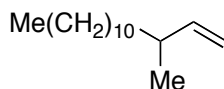

### 3-Methyltetradec-1-ene (Table 3, entry 2)

$\text{Pd}(\text{P}(t\text{-Bu})_2\text{Me})_2$  (15.4 mg, 36  $\mu\text{mol}$ , 6.0 mol%), LiOMe (288  $\mu\text{L}$  of a 125  $\mu\text{M}$  solution in dioxane; 6.0 mol%), 90  $^\circ\text{C}$  (24 h). The product was purified by flash chromatography on silica gel (100% pentane). Clear, colorless oil. First run: 122 mg (97%). Second run: 123 mg (97%).

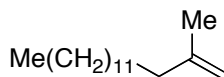

### 2-Methylpentadec-1-ene (Table 3, entry 3)

$\text{Pd}(\text{P}(t\text{-Bu})_2\text{Me})_2$  (43.5 mg, 100  $\mu\text{mol}$ , 17 mol%), LiOMe (816  $\mu\text{L}$  of a 125  $\mu\text{M}$  solution in dioxane; 6.0 mol%), 100  $^\circ\text{C}$  (24 h). The product was purified by flash chromatography on silica gel (100% pentane). Clear, colorless oil. First run: 129 mg (96%). Second run: 130 mg (97%).

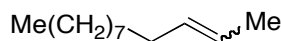

### 2-Dodecene and 1-dodecene (Table 3, entry 4)

$\text{Pd}(\text{P}(t\text{-Bu})_2\text{Me})_2$  (64 mg, 150  $\mu\text{mol}$ , 25 mol%), LiOMe (1.2 mL of a 125  $\mu\text{M}$  solution in dioxane;

25 mol%), 100 °C (24 h). The product was purified by flash chromatography on silica gel (100% pentane). Clear, colorless oil. First run: 97 mg (96%). Second run: 93 mg (92%). Olefin isomerization was observed (1:2 ratio of terminal to internal alkenes, as determined by <sup>1</sup>H NMR spectroscopy).

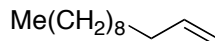

#### 1-Dodecene [112-41-4] (Table 3, entry 5)

Pd(P(*t*-Bu)<sub>2</sub>Me)<sub>2</sub> (30.7 mg, 72 μmol, 12 mol%), LiOMe (576 μL of a 125 μM solution in dioxane; 12 mol%), 80 °C (8 h). The product was purified by flash chromatography on silica gel (100% pentane). Clear, colorless oil. First run: 88 mg (87%). Second run: 95 mg (94%). This product was identical to authentic material (Aldrich) by <sup>1</sup>H NMR spectroscopy, <sup>13</sup>C NMR spectroscopy, and GC analysis.

Olefin isomerization was observed (14:1 ratio of terminal to internal alkenes, as determined by <sup>1</sup>H NMR spectroscopy).

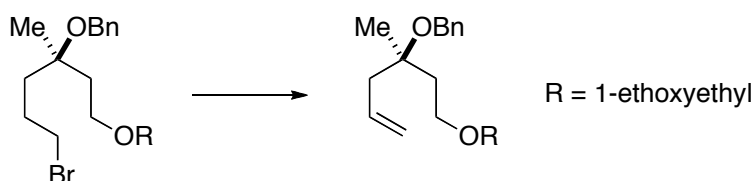

#### (*R*)-{[(1-(1-Ethoxyethoxy)-3-methylhex-5-en-3-yl)oxy]methyl}benzene (Figure 2)

The title compound was prepared according to the general procedure from (*R*)-{[(6-bromo-1-(1-ethoxyethoxy)-3-methylhexan-3-yl)oxy]methyl}benzene (160 mg, 0.43 mmol) with Pd(P(*t*-Bu)<sub>2</sub>Me)<sub>2</sub> (18.3 mg, 43 μmol, 10 mol%). The product was purified by flash chromatography (25% by weight AgNO<sub>3</sub>-doped silica/silica; 90:10:1 *v/v/v* hexane/EtOAc/Et<sub>3</sub>N) and isolated as a clear, light-yellow oil (117 mg, 93%).

<sup>1</sup>H NMR (500 MHz, C<sub>6</sub>D<sub>6</sub>) δ 7.37 (d, 2H, *J* = 8.0 Hz), 7.21 (t, 2H, *J* = 7.5 Hz), 7.11 (t, 1H, *J* = 7.0 Hz), 5.94-5.86 (m, 1H), 5.06-5.00 (m, 2H), 4.63-4.57 (m, 1H), 4.28 (s, 2H), 3.87-3.79 (m, 1H), 3.70-3.51 (m, 2H), 3.37-3.25 (m, 1H), 2.31-2.20 (m, 2H), 1.99-1.84 (m, 2H), 1.27 (t, 3H, *J* = 5.5 Hz), 1.13 (s, 6H).

<sup>13</sup>C NMR (125 MHz, C<sub>6</sub>D<sub>6</sub>) δ 140.2, 134.8, 128.5, 127.5, 127.3, 117.6, 100.0, 99.8, 76.0, 63.5, 61.3, 61.2, 43.8, 43.7, 38.2, 23.7, 23.6, 20.0, 15.7.

FT-IR (neat) 2976, 2932, 2361, 2341, 1718, 1455, 1381, 1274, 1131, 1098, 1060, 914 cm<sup>-1</sup>.

MS (EI) *m/z* (M-C<sub>4</sub>H<sub>9</sub>O<sup>+</sup>) calcd for C<sub>14</sub>H<sub>19</sub>O<sub>2</sub>: 219, found: 219.

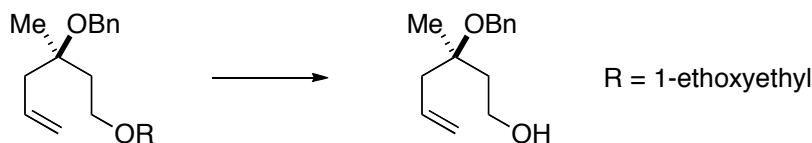

#### (*R*)-3-(Benzyloxy)-3-methylhex-5-en-1-ol (Figure 2)

A solution of HCl (4 M aqueous solution; 0.2 mL) was added dropwise to a mixture of silica

gel (1 g) in CH<sub>2</sub>Cl<sub>2</sub> (5 mL). The mixture was cooled to 0 °C, and a solution of (*R*)-{[(1-(1-ethoxyethoxy)-3-methylhex-5-en-3-yl)oxy]methyl}benzene (89 mg, 0.30 mmol) in CH<sub>2</sub>Cl<sub>2</sub> (3 mL) was added dropwise. After 4 h of stirring at 0 °C, the mixture was filtered through a short pad of silica (Et<sub>2</sub>O). The filtrate was concentrated under reduced pressure, and the residue was purified by flash chromatography (silica; 7:3 *v/v* hexane/Et<sub>2</sub>O), which provided the title compound as a clear, colorless oil (66 mg, 98%).<sup>4</sup>

<sup>1</sup>H NMR (500 MHz, C<sub>6</sub>D<sub>6</sub>) δ 7.25 (d, 2H, *J* = 7.0 Hz), 7.14 (m, 2H), 7.05 (t, 1H, *J* = 7.0 Hz), 5.70 (ddt, 1H, *J* = 3.0, 10.0, 17.5 Hz), 4.99-4.91 (m, 2H), 4.15 (s, 2H), 3.66 (m, 2H), 2.13 (m, 2H) 1.72 (m, 1H), 1.44 (m, 1H), 1.28 (br s, 1H), 0.98 (s, 3H).

<sup>13</sup>C NMR (125 MHz, C<sub>6</sub>D<sub>6</sub>) δ 137.7, 132.5, 126.6, 125.63, 125.56, 115.8, 75.6, 61.8, 57.0, 41.3, 38.6, 21.0.

FT-IR (neat) 3419, 2929, 1718, 1640, 1455, 1382, 1051, 914 cm<sup>-1</sup>.

MS (ESI) *m/z* (M+Na<sup>+</sup>) calcd for C<sub>14</sub>H<sub>20</sub>NaO<sub>2</sub>: 243, found: 243.

[α]<sub>D</sub><sup>23</sup> = -3.2° (c = 0.0145, CH<sub>2</sub>Cl<sub>2</sub>).

#### IV. Mechanistic Studies

**Determination of the Rate Law for 1-Bromododecane.** 1-Bromododecane (25 mg, 0.10 mmol) and *n*-decane (19.5 μL, 0.10 mmol; internal standard) were added to a 4-mL vial equipped with a stir bar. This vial was transferred into a glovebox, where dioxane (150 μL), Cy<sub>2</sub>NH (24 μL, 0.12 mmol), and Pd(P(*t*-Bu)<sub>2</sub>Me)<sub>2</sub> (the specified amount, in 50 μL of dioxane) were added in turn. The vial was then capped, and the reaction mixture was stirred at room temperature in the glovebox. An aliquot was taken from the reaction mixture every 10 min over a period of 60 min. The aliquots thus obtained were quenched upon removal from the glovebox, and after dilution with Et<sub>2</sub>O the mixtures were passed through Acrodisc filters. The amount of product and starting material was determined by GC analysis (calibrated with *n*-decane as an internal standard). The initial rate was measured by plotting the yield of 1-dodecene over the first 60 min of the reaction.

##### Order in Pd(P(*t*-Bu)<sub>2</sub>Me)<sub>2</sub>

Table S1. Observed Initial Rates.

| Pd(P( <i>t</i> -Bu) <sub>2</sub> Me) <sub>2</sub><br>(%) | k <sub>obs</sub><br>(μM/min) |
|----------------------------------------------------------|------------------------------|
| 0                                                        | 0                            |
| 2                                                        | 1.4                          |
| 4                                                        | 2.3                          |
| 6                                                        | 3.3                          |

(4) Ray, N. C.; Raveendrath, P. C.; Spencer, T. A. *Tetrahedron* **1992**, *48*, 9427–9432.



Figure S1.

Order in Pd(P(*t*-Bu)<sub>2</sub>Me)<sub>2</sub>

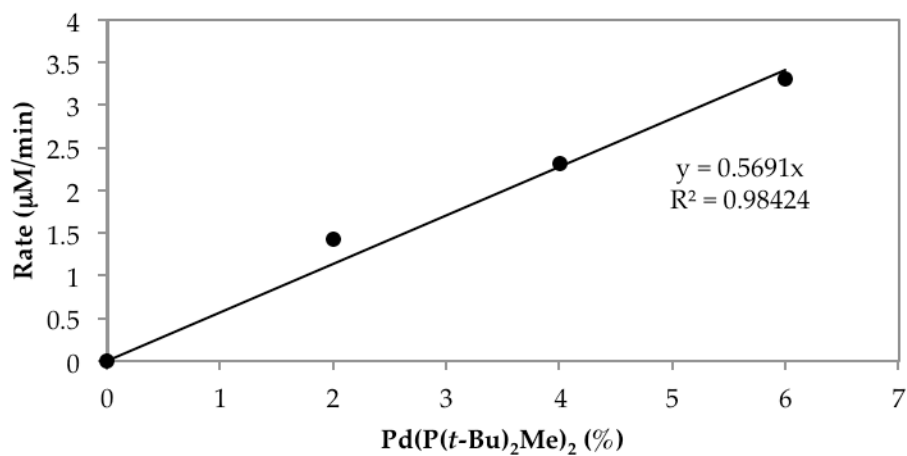

Order in Cy<sub>2</sub>NH

Table S2. Observed Initial Rates.

| Cy <sub>2</sub> NH (equiv) | k <sub>obs</sub> (μM/min) |
|----------------------------|---------------------------|
| 0.5                        | 3.5                       |
| 1                          | 3.8                       |
| 1.5                        | 3.5                       |
| 2                          | 3.9                       |
| 3                          | 3.2                       |

Figure S2.

Order in Cy<sub>2</sub>NH

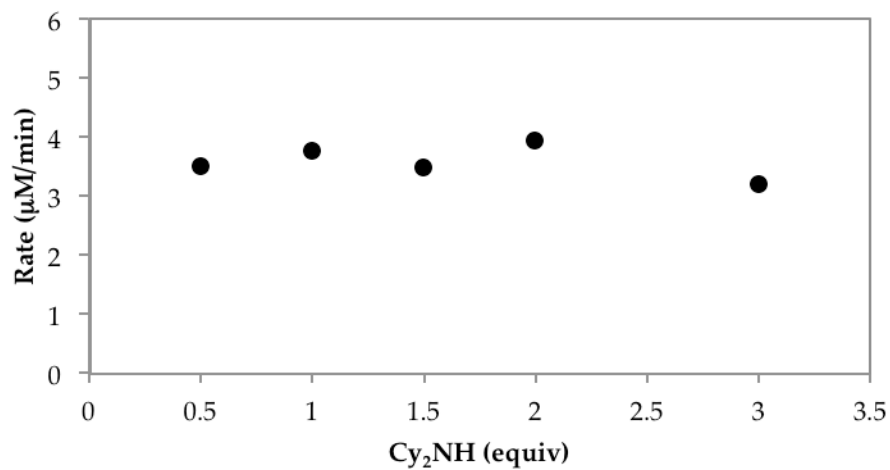

### Order in 1-Bromododecane

Table S3. Observed Initial Rates.

| 1-bromododecane<br>(mM) | $k_{\text{obs}}$<br>( $\mu\text{M}/\text{min}$ ) |
|-------------------------|--------------------------------------------------|
| 0                       | 0                                                |
| 0.125                   | 1.3                                              |
| 0.25                    | 2.3                                              |
| 0.5                     | 3.2                                              |
| 1                       | 4.5                                              |
| 1.5                     | 4.6                                              |

Figure S3.

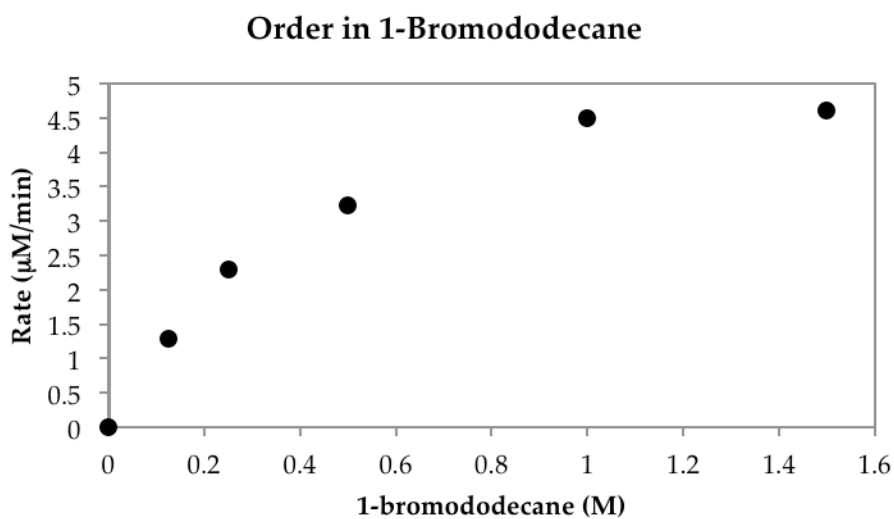

### eq 4

In a glovebox, 1-bromododecane (9.0 mg, 36  $\mu\text{mol}$ ) and  $\text{Pd}(\text{P}(t\text{-Bu})_2\text{Me})_2$  (12.2 mg, 29  $\mu\text{mol}$ ; in 480  $\mu\text{L}$  of dioxane) were added to a screw-cap NMR tube. The progress of the reaction was monitored periodically by  $^{31}\text{P}$  NMR spectroscopy.

**Table S4.** Relative amounts of palladium compounds.

| Time (h) | L <sub>2</sub> Pd | L <sub>2</sub> PdRBr | L <sub>2</sub> PdHBr |
|----------|-------------------|----------------------|----------------------|
| 0.08     | 70                | 17                   | 13                   |
| 0.33     | 38                | 25                   | 38                   |
| 0.58     | 20                | 22                   | 58                   |
| 0.83     | 5                 | 25                   | 70                   |
| 1.1      | 5                 | 20                   | 75                   |
| 1.5      | trace             | 17                   | 83                   |
| 2.0      | –                 | 12                   | 88                   |
| 2.5      | –                 | 10                   | 90                   |
| 3.0      | –                 | –                    | 100                  |

L = P(*t*-Bu)<sub>2</sub>Me**eq 5**

In a glovebox, 1-bromododecane (9.0 mg, 36 μmol), P(*t*-Bu)<sub>2</sub>Me (8.4 mg, 43 μmol), Pd(P(*t*-Bu)<sub>2</sub>Me)<sub>2</sub> (12.2 mg, 29 μmol; in 240 μL of dioxane), OPPh<sub>3</sub> (7.9 mg, 29 μmol; in 240 μL of dioxane solution; internal standard) were added to a screw-cap NMR tube. The progress of the reaction was monitored periodically by <sup>31</sup>P NMR spectroscopy.

**Table S5.** Relative amounts of palladium compounds.

| Time (h) | L <sub>2</sub> Pd | L <sub>2</sub> PdRBr | L <sub>2</sub> PdHBr |
|----------|-------------------|----------------------|----------------------|
| 1.0      | 10                | 78                   | 12                   |
| 1.5      | trace             | 80                   | 20                   |
| 2.0      | –                 | 75                   | 25                   |
| 3.0      | –                 | 62                   | 38                   |
| 6.0      | –                 | 34                   | 66                   |
| 10.0     | –                 | 14                   | 86                   |
| 12.0     | –                 | –                    | 100                  |

L = P(*t*-Bu)<sub>2</sub>Me

**Procedure for Kinetic Isotope Effect Experiments (1-bromododecane vs. 1-bromododecane-2,2-d<sub>2</sub>) (eq 6).** 1-Bromododecane (24 μL, 0.10 mmol) and *n*-decane (19.5 μL, 0.10 mmol; internal standard) were added to a 4-mL vial equipped with a stir bar. This vial was transferred into a glovebox, where dioxane (150 μL), Cy<sub>2</sub>NH (24 μL, 0.12 mmol), and Pd(P(*t*-Bu)<sub>2</sub>Me)<sub>2</sub> (2.6 mg, 6.0 μmol; in 50 μL of dioxane) were added in turn. The vial was then capped, and the reaction mixture was stirred at room temperature in the glovebox. An aliquot was taken from the reaction mixture every 5 min over a period of 30 min. The aliquots thus obtained were quenched upon removal from the glovebox, and after dilution with Et<sub>2</sub>O the mixtures were passed through Acrodisc filters. The amount of product and starting material was determined by GC analysis (calibrated with *n*-decane as an internal standard). The initial rate was measured by plotting the yield of 1-dodecene over the first 30 min of the reaction.

This procedure was repeated, but with 1-bromododecane-2,2-d<sub>2</sub> rather than with 1-bromododecane.

Figure S4.

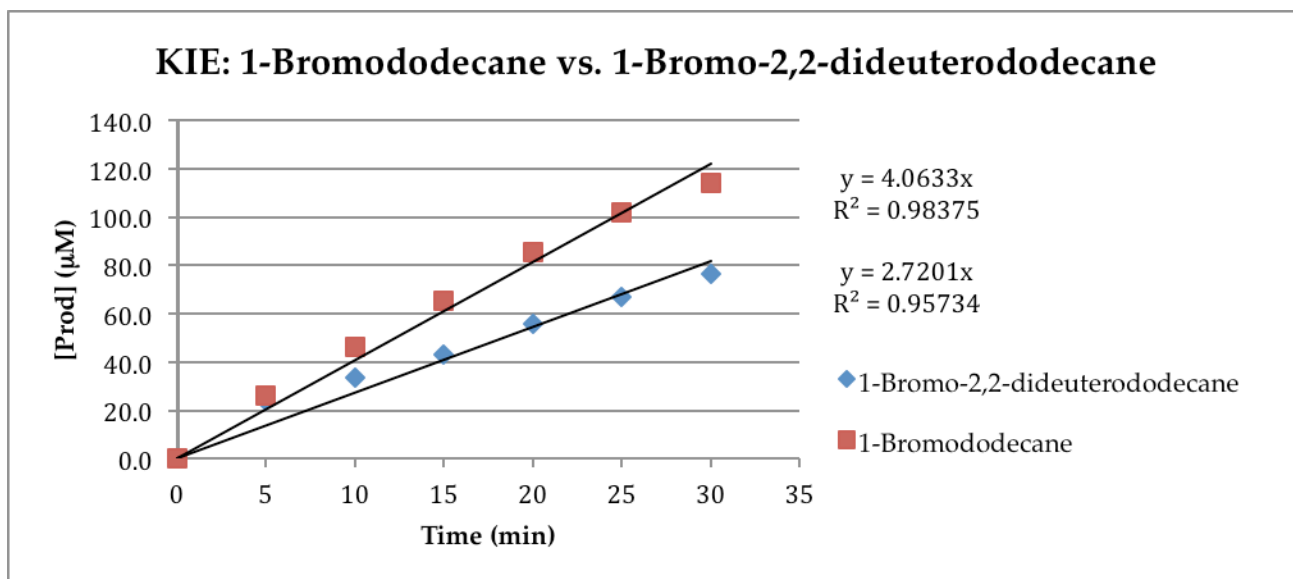

**Determination of the Rate Law for 1-Bromo-2-methylpentadecane (eq 7).** 1-Bromo-2-methylpentadecane (31 mg, 0.10 mmol) and *n*-decane (19.5 µL, 0.10 mmol; internal standard) were added to a 4-mL vial equipped with a stir bar. This vial was transferred into a glovebox, where dioxane (150 µL), Cy<sub>2</sub>NH (24 µL, 0.12 mmol), and Pd(P(*t*-Bu)<sub>2</sub>Me)<sub>2</sub> (the specified amount, in 50 µL of dioxane) were added in turn. The vial was then capped, and the reaction mixture was stirred at room temperature in the glovebox. An aliquot was taken from the reaction mixture every 10 min over a period of 2.5 h. The aliquots thus obtained were quenched upon removal from the glovebox, and after dilution with Et<sub>2</sub>O the mixtures were passed through Acrodisc filters. The amount of product and starting material was determined by GC analysis (calibrated with *n*-decane as an internal standard). The initial rate was measured by plotting the yield of 1-dodecene over the first 2.5 h of the reaction.

*Order in Pd(P(*t*-Bu)<sub>2</sub>Me)<sub>2</sub>*

**Table S6.** Observed Initial Rates.

| Pd(P( <i>t</i> -Bu) <sub>2</sub> Me) <sub>2</sub><br>(%) | k <sub>obs</sub><br>(µM/h) |
|----------------------------------------------------------|----------------------------|
| 0                                                        | 0                          |
| 2                                                        | 3.8                        |
| 4                                                        | 10.6                       |
| 6                                                        | 16.6                       |
| 8                                                        | 20.8                       |

Figure S5.

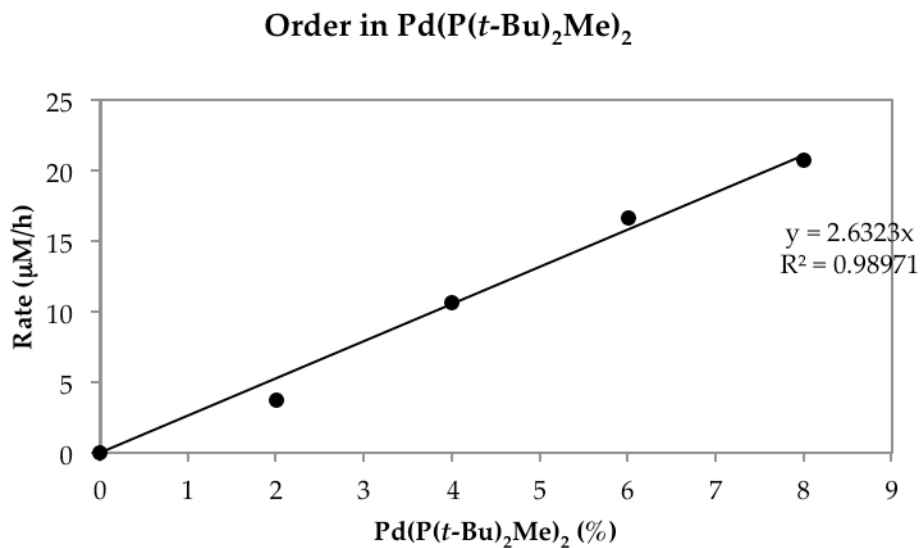

Order in Cy<sub>2</sub>NH (aliquots taken every 10 min for 50 min)

Table S7. Observed Initial Rates.

| Cy <sub>2</sub> NH (equiv) | k <sub>obs</sub> (µM/min) |
|----------------------------|---------------------------|
| 0.5                        | 0.36                      |
| 1                          | 0.32                      |
| 2                          | 0.28                      |
| 3                          | 0.26                      |

Figure S6.

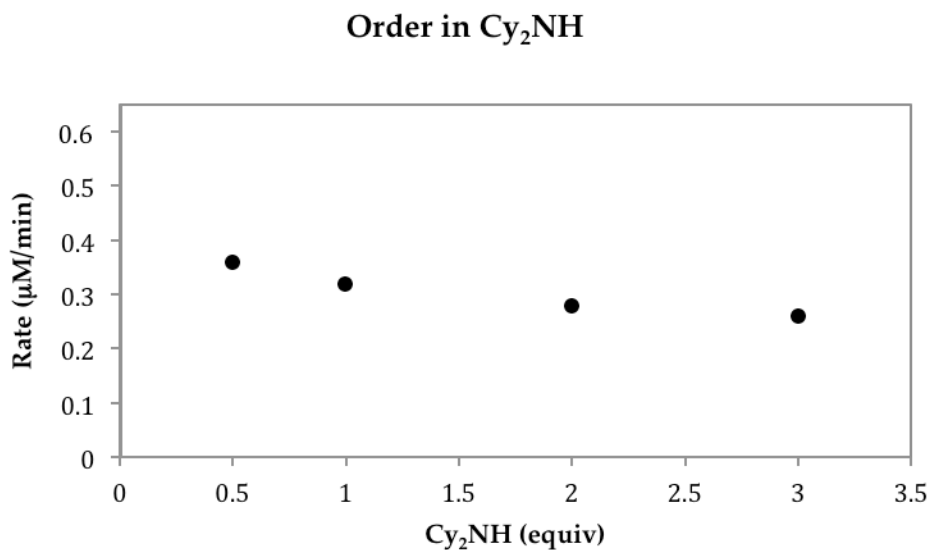

### Order in 1-Bromo-2-methylpentadecane

Table S8. Observed Initial Rates.

| 1-bromo-2-methylpentadecane<br>(M) | $k_{\text{obs}}$<br>( $\mu\text{M}/\text{h}$ ) |
|------------------------------------|------------------------------------------------|
| 0                                  | 0                                              |
| 0.2                                | 9.9                                            |
| 0.3                                | 13                                             |
| 0.4                                | 16.2                                           |
| 0.5                                | 17.5                                           |
| 0.6                                | 22.8                                           |

Figure S7.

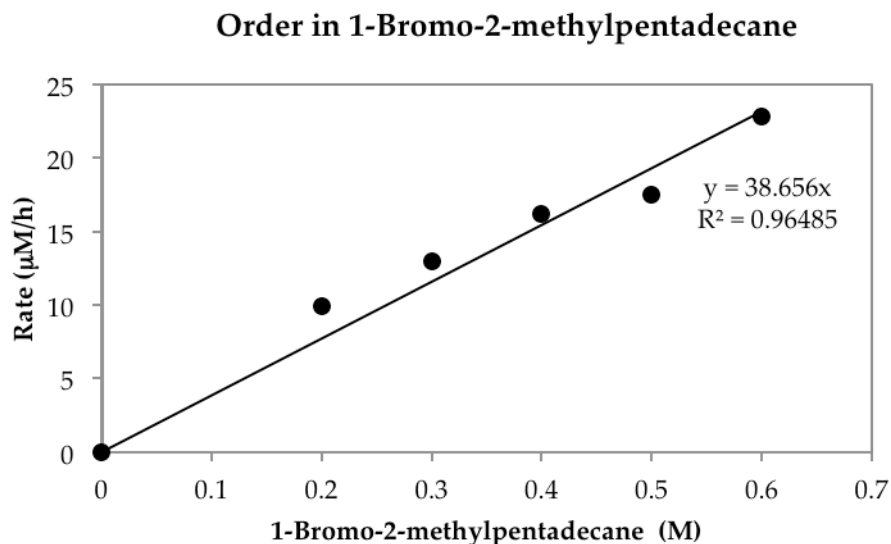

### eq 9

In a glovebox,  $\text{Cy}_2\text{NH}$  (118 mg, 0.59 mmol) and *trans*- $\text{Pd}(\text{P}(t\text{-Bu})_2\text{Me})_2\text{HBr}$  (15.0 mg, 30  $\mu\text{mol}$ ; in 480  $\mu\text{L}$  of dioxane) were added to a screw-cap NMR tube. The progress of the reaction was monitored periodically by  $^{31}\text{P}$  NMR spectroscopy.

Table S9. Relative ratios of palladium compounds.

| Time (h) | $\text{L}_2\text{PdHBr}$ | $\text{L}_2\text{Pd}$ |
|----------|--------------------------|-----------------------|
| 24       | 40                       | 1                     |

$\text{L} = \text{P}(t\text{-Bu})_2\text{Me}$

**General Procedure for Competition Experiments: Reactivity as a Function of the Steric Demand of the Alkyl Bromide.** 1-Bromododecane (24 mg, 0.10 mmol), the second alkyl bromide (0.10 mmol), and *n*-decane (19.5  $\mu$ L, 0.10 mmol; internal standard) were added to a 4-mL vial equipped with a stir bar. This vial was transferred into a glovebox, where dioxane (140  $\mu$ L),  $\text{Cy}_2\text{NH}$  (48  $\mu$ L, 0.24 mmol),  $\text{KO}t\text{-Bu}$  (160  $\mu$ L of a 125  $\mu$ M dioxane solution, 20  $\mu$ mol), and  $\text{Pd}(\text{P}(t\text{-Bu})_2\text{Me})_2$  (5.2 mg, 12  $\mu$ mol, in 100  $\mu$ L of dioxane) were added. The vial was then capped, and the reaction mixture was stirred at room temperature in the glovebox. An aliquot was taken from the reaction mixture every 15 minutes over a period of 60-75 minutes. The aliquots thus obtained were quenched upon removal from the glovebox, and after dilution with  $\text{Et}_2\text{O}$  the mixtures were passed through Acrodisc filters. The amount of product and starting material was determined by GC analysis (calibrated with *n*-decane as an internal standard). The initial rate was measured by plotting the yield of 1-dodecene and the yield of the other alkene over the first 60-75 min of the reaction.

### 1-Bromododecane vs. 1-Bromo-2-methylpentadecane

Figure S8.

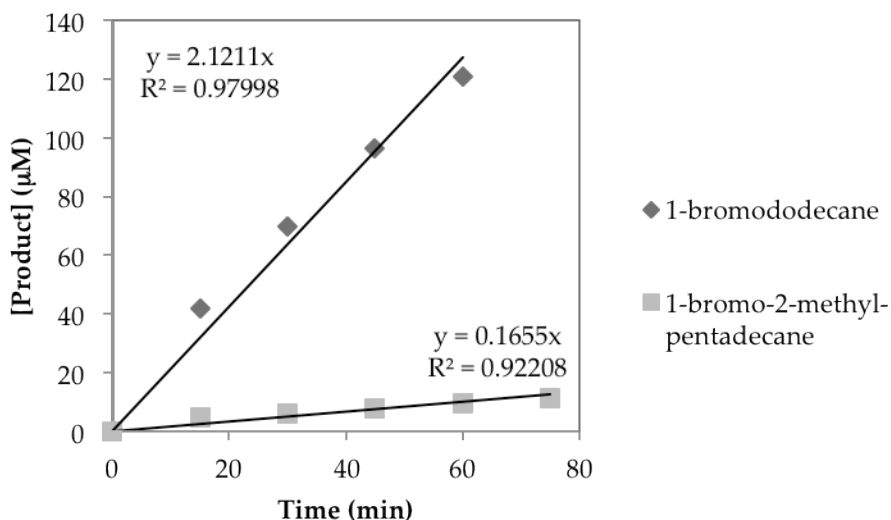

# 1-Bromododecane vs. 1-Bromo-3-methyltetradecane

Figure S9.

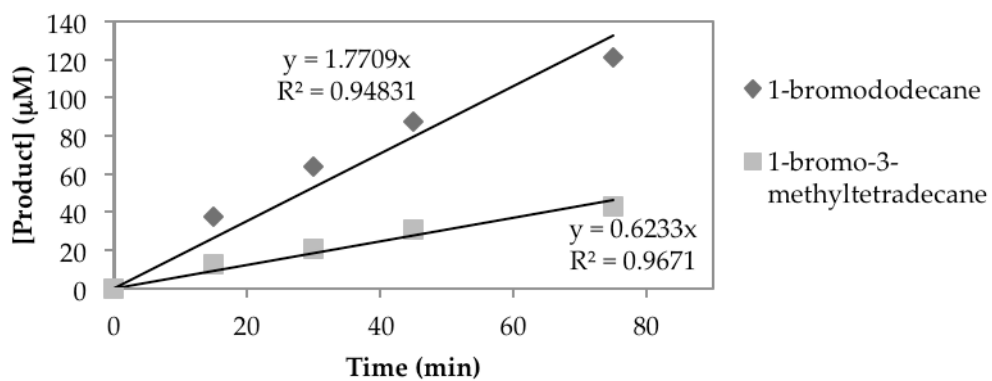



IV.  $^1\text{H}$  NMR Spectra

$\text{Me}(\text{CH}_2)_8$    
Table 2, entry 1

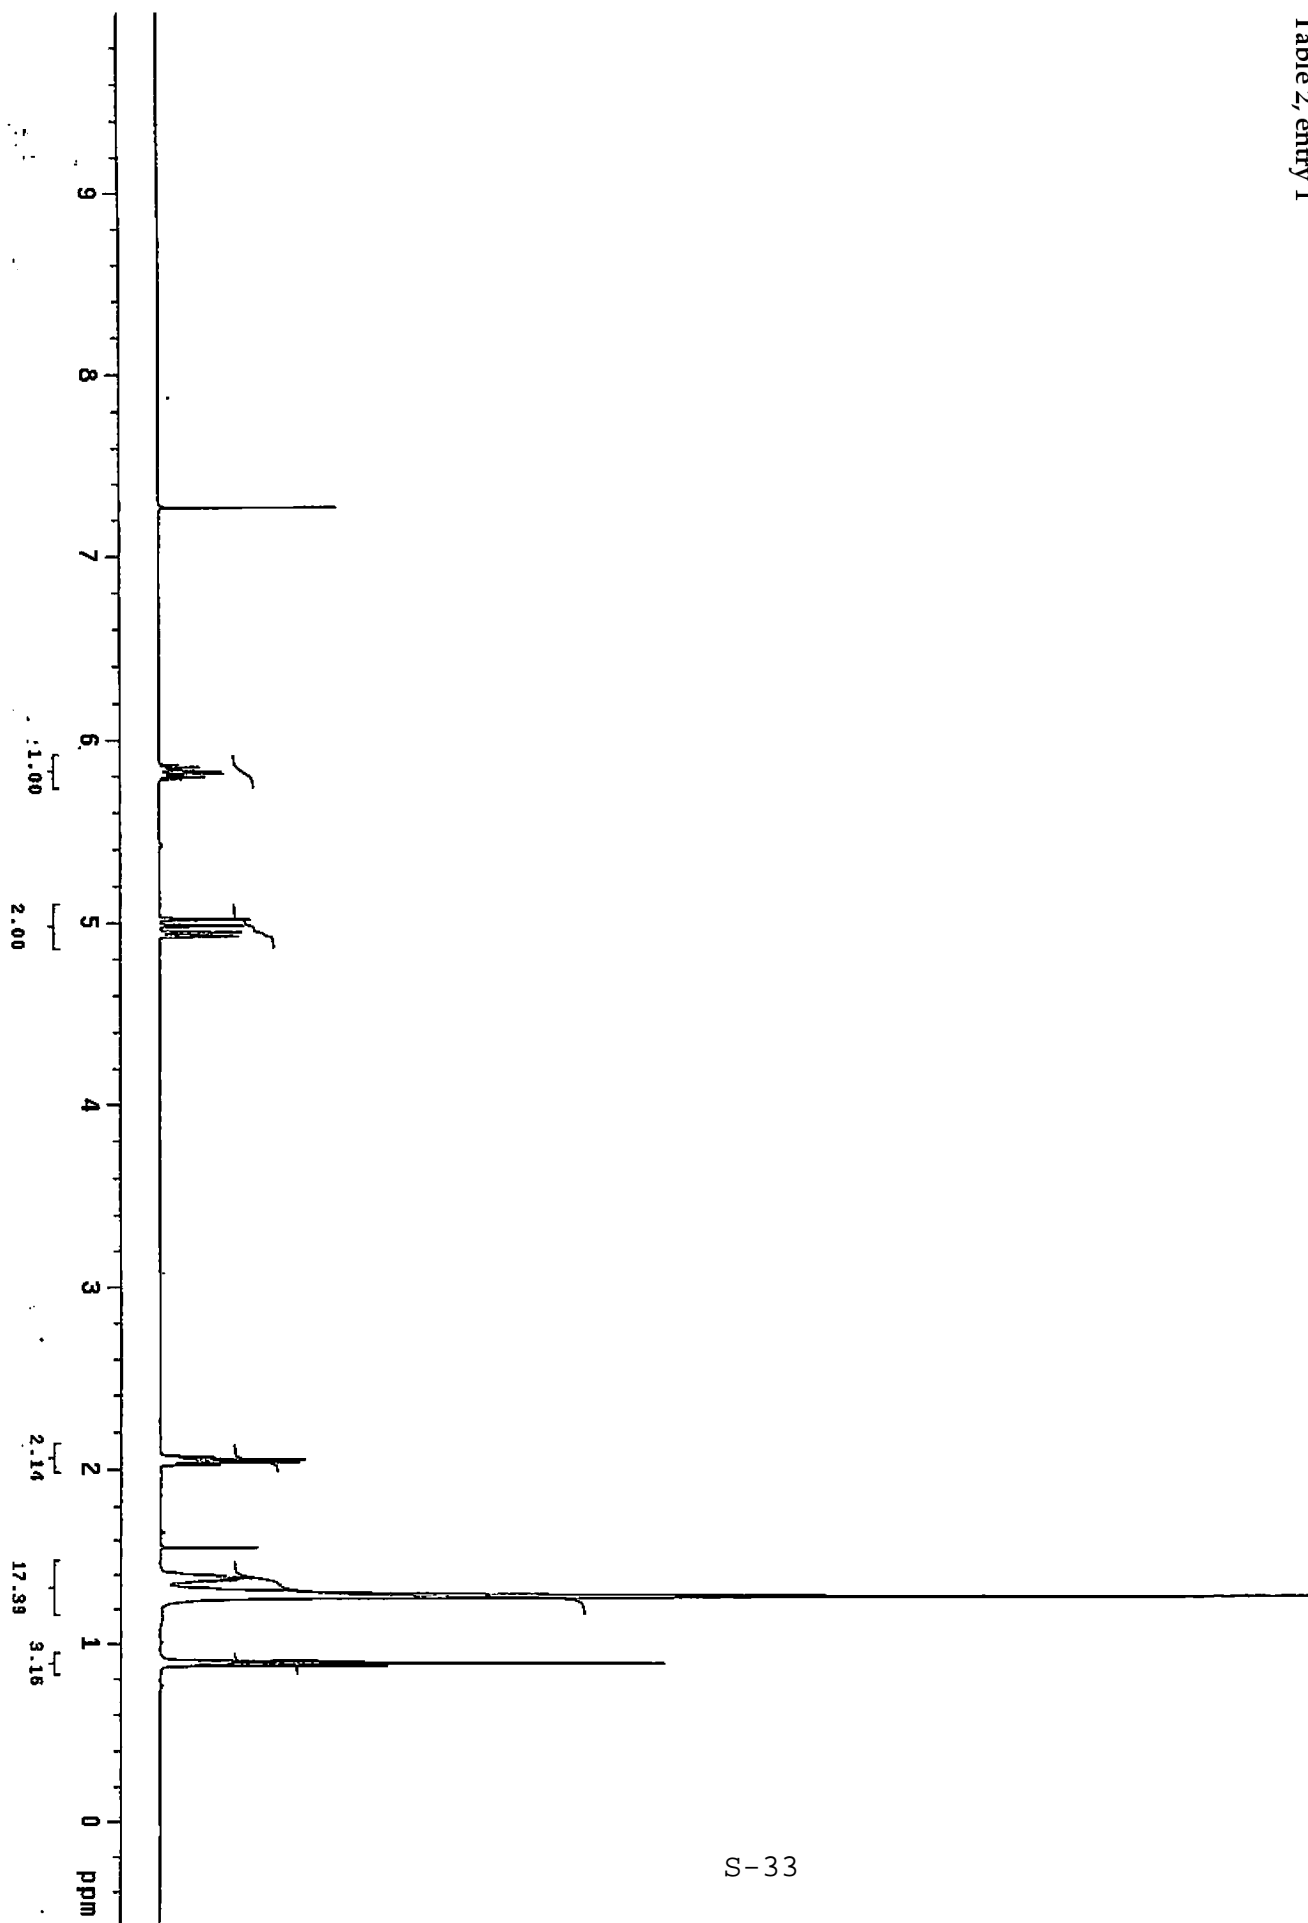

Me(CH<sub>2</sub>)<sub>10</sub>  
Me  
Table 2, entry 2

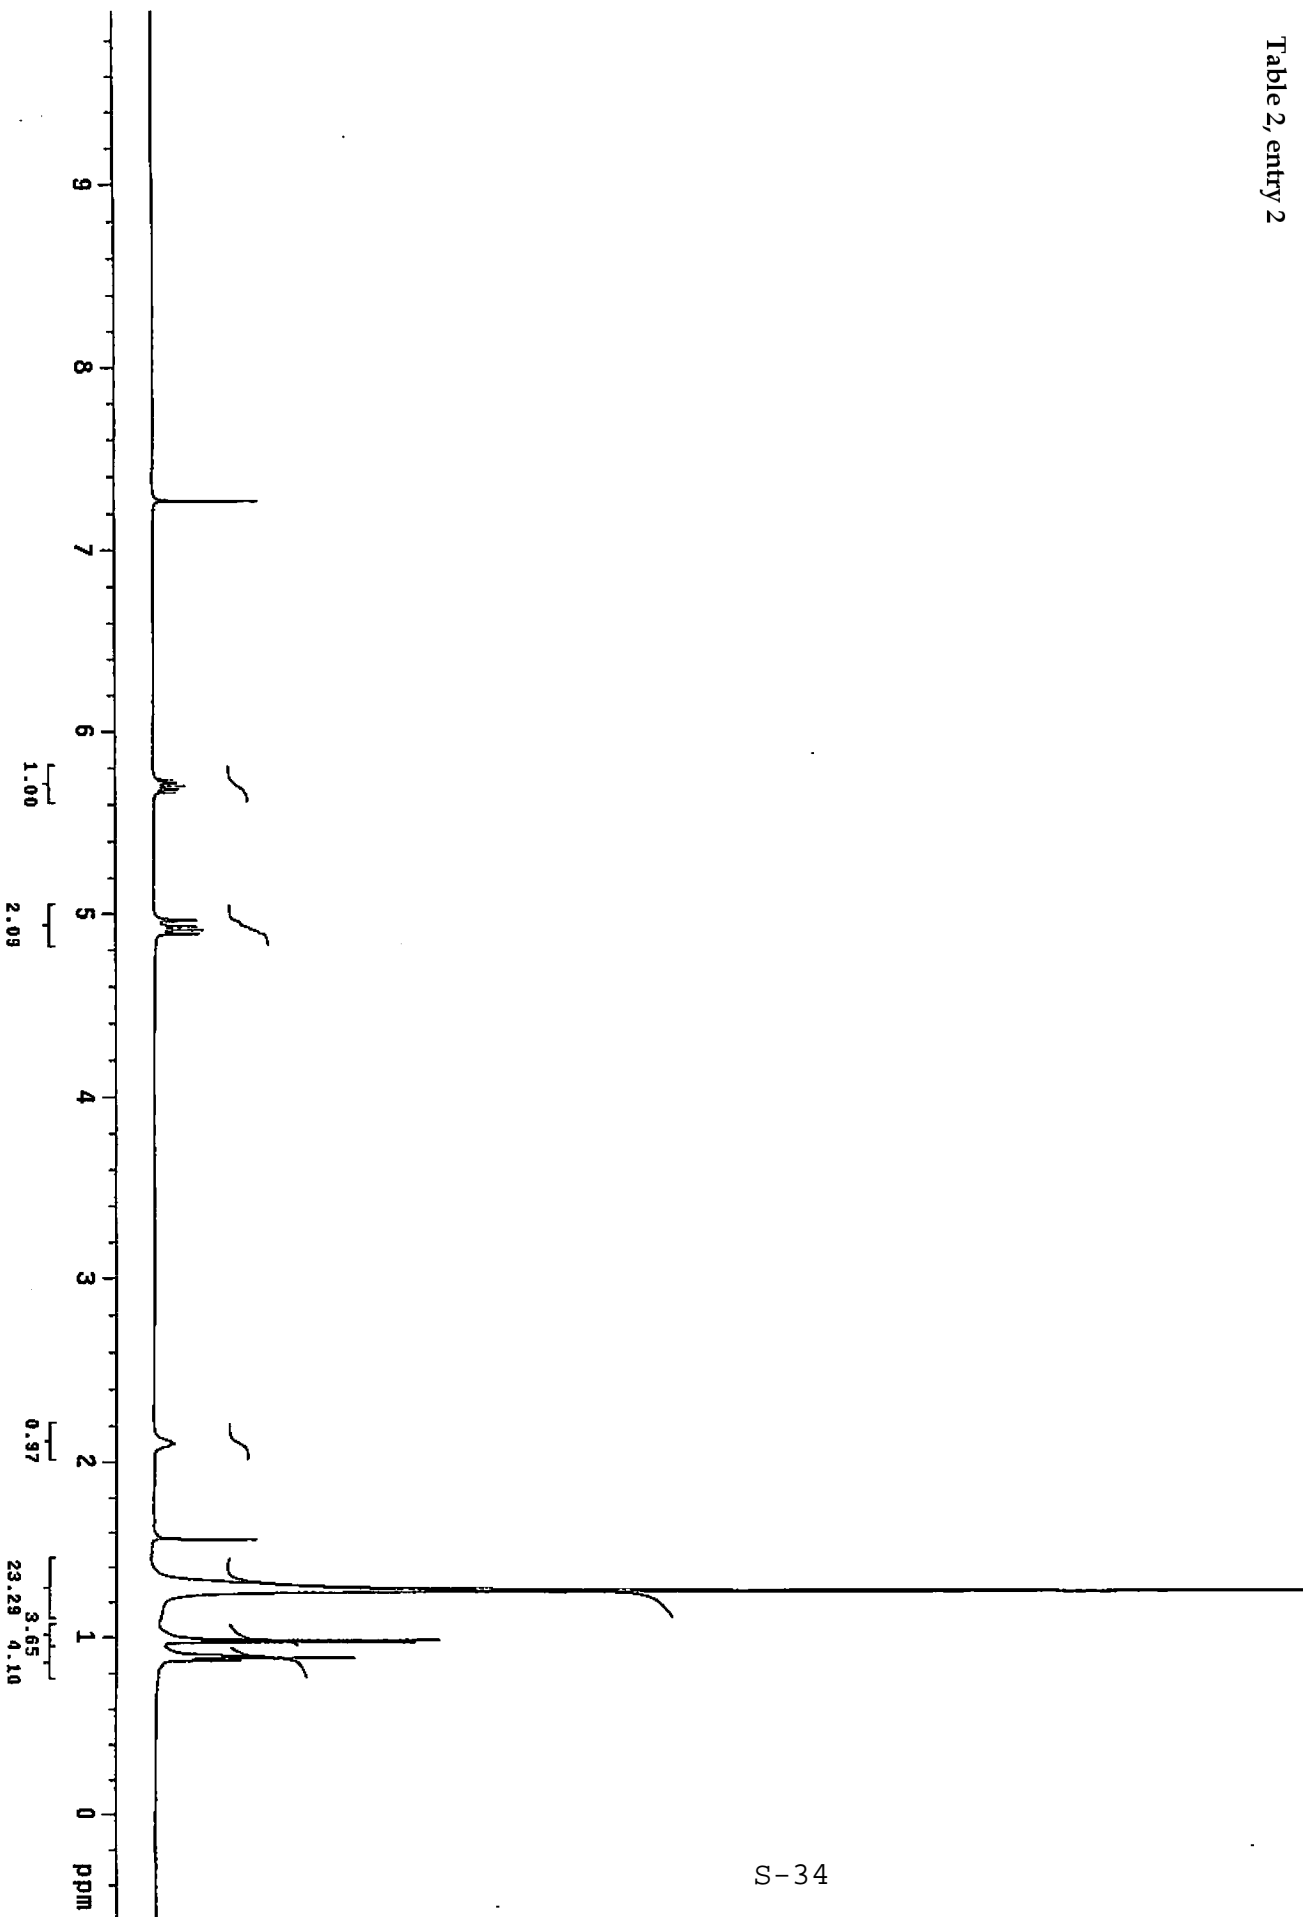

Me(CH<sub>2</sub>)<sub>11</sub>  
Table 2, entry 3

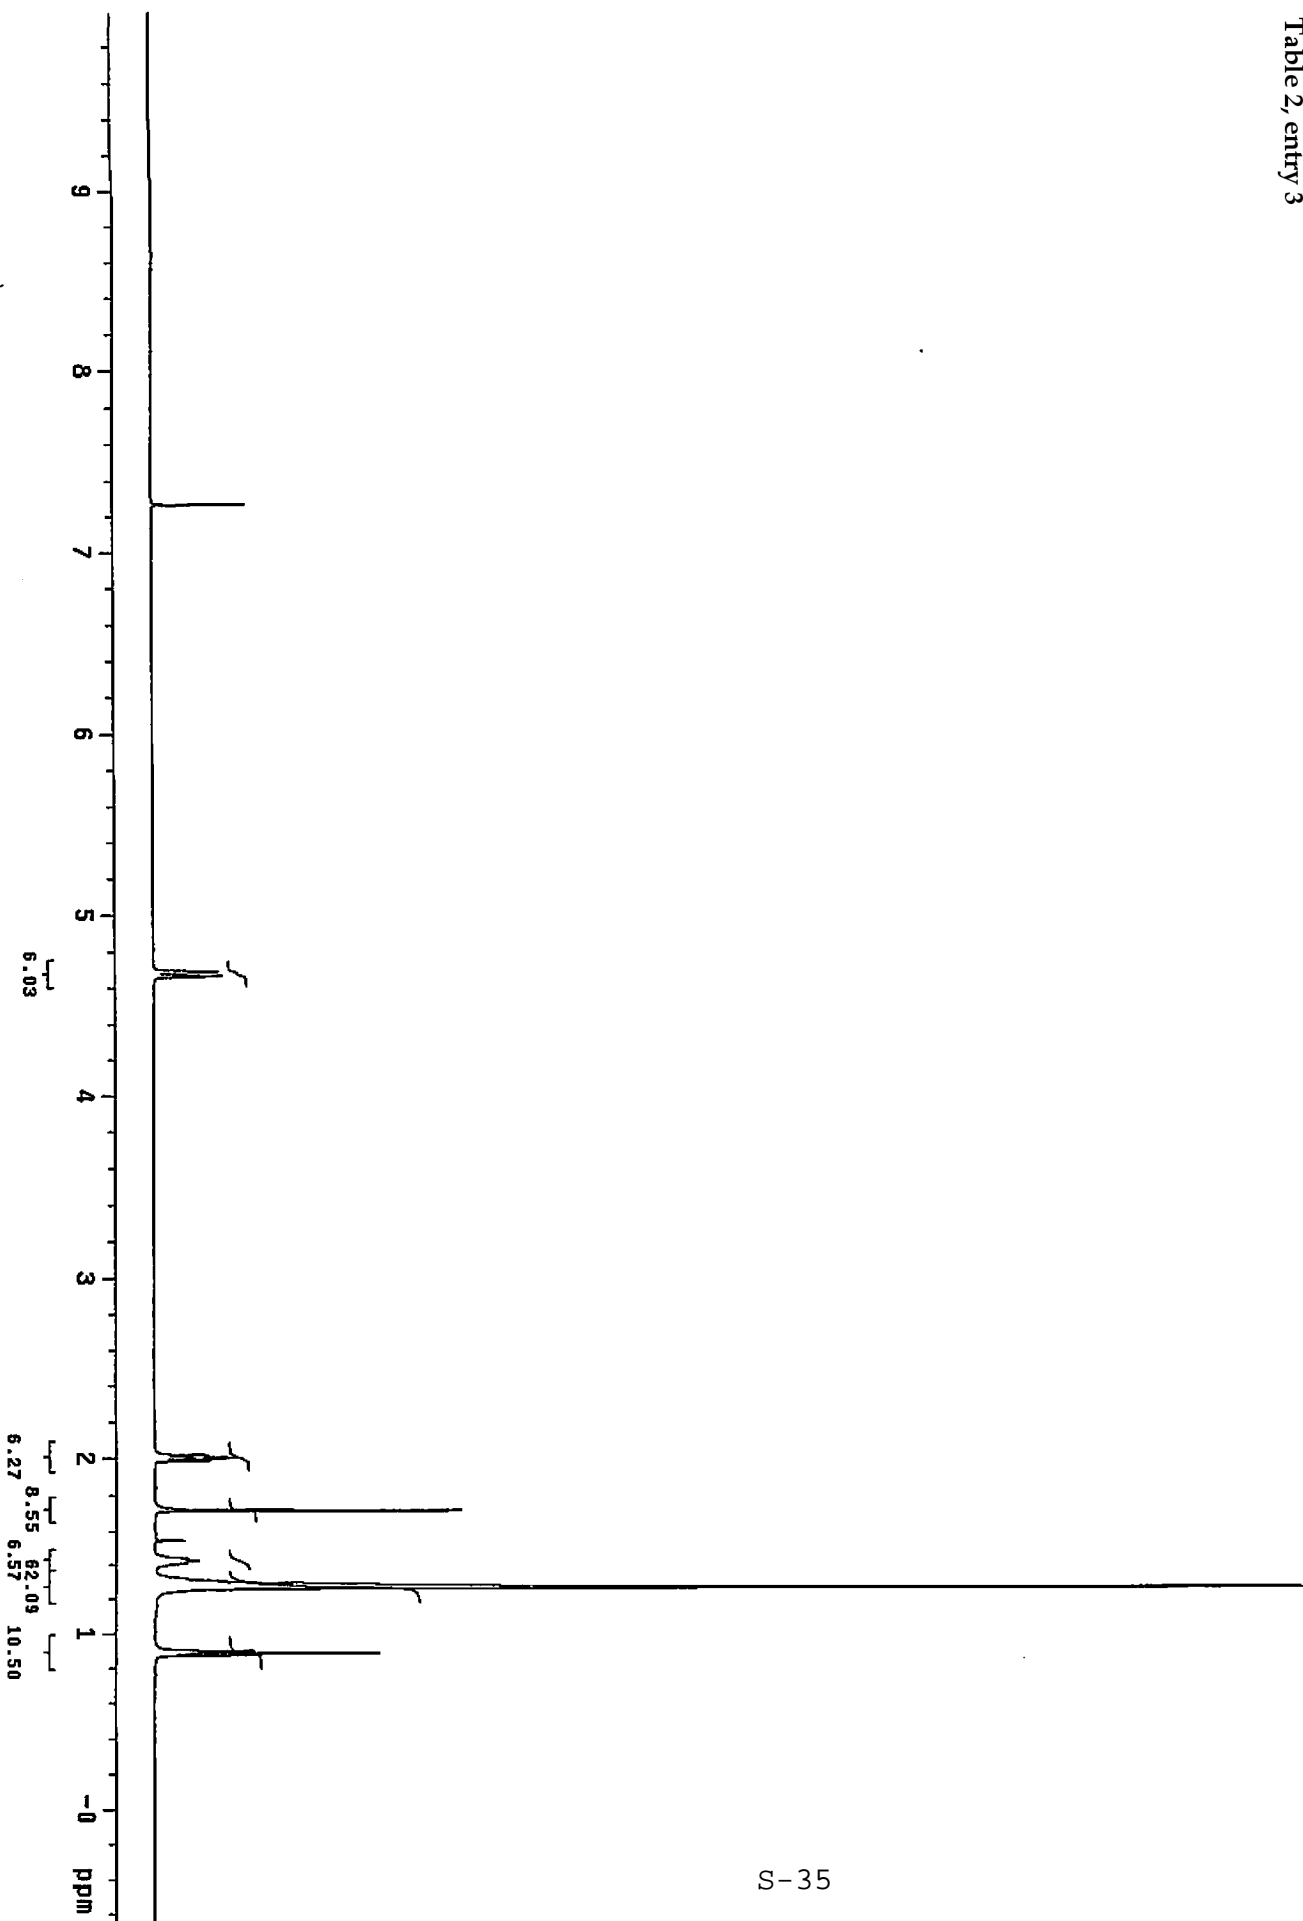

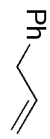

Table 2, entry 4

*n*-decane  
(internal standard)

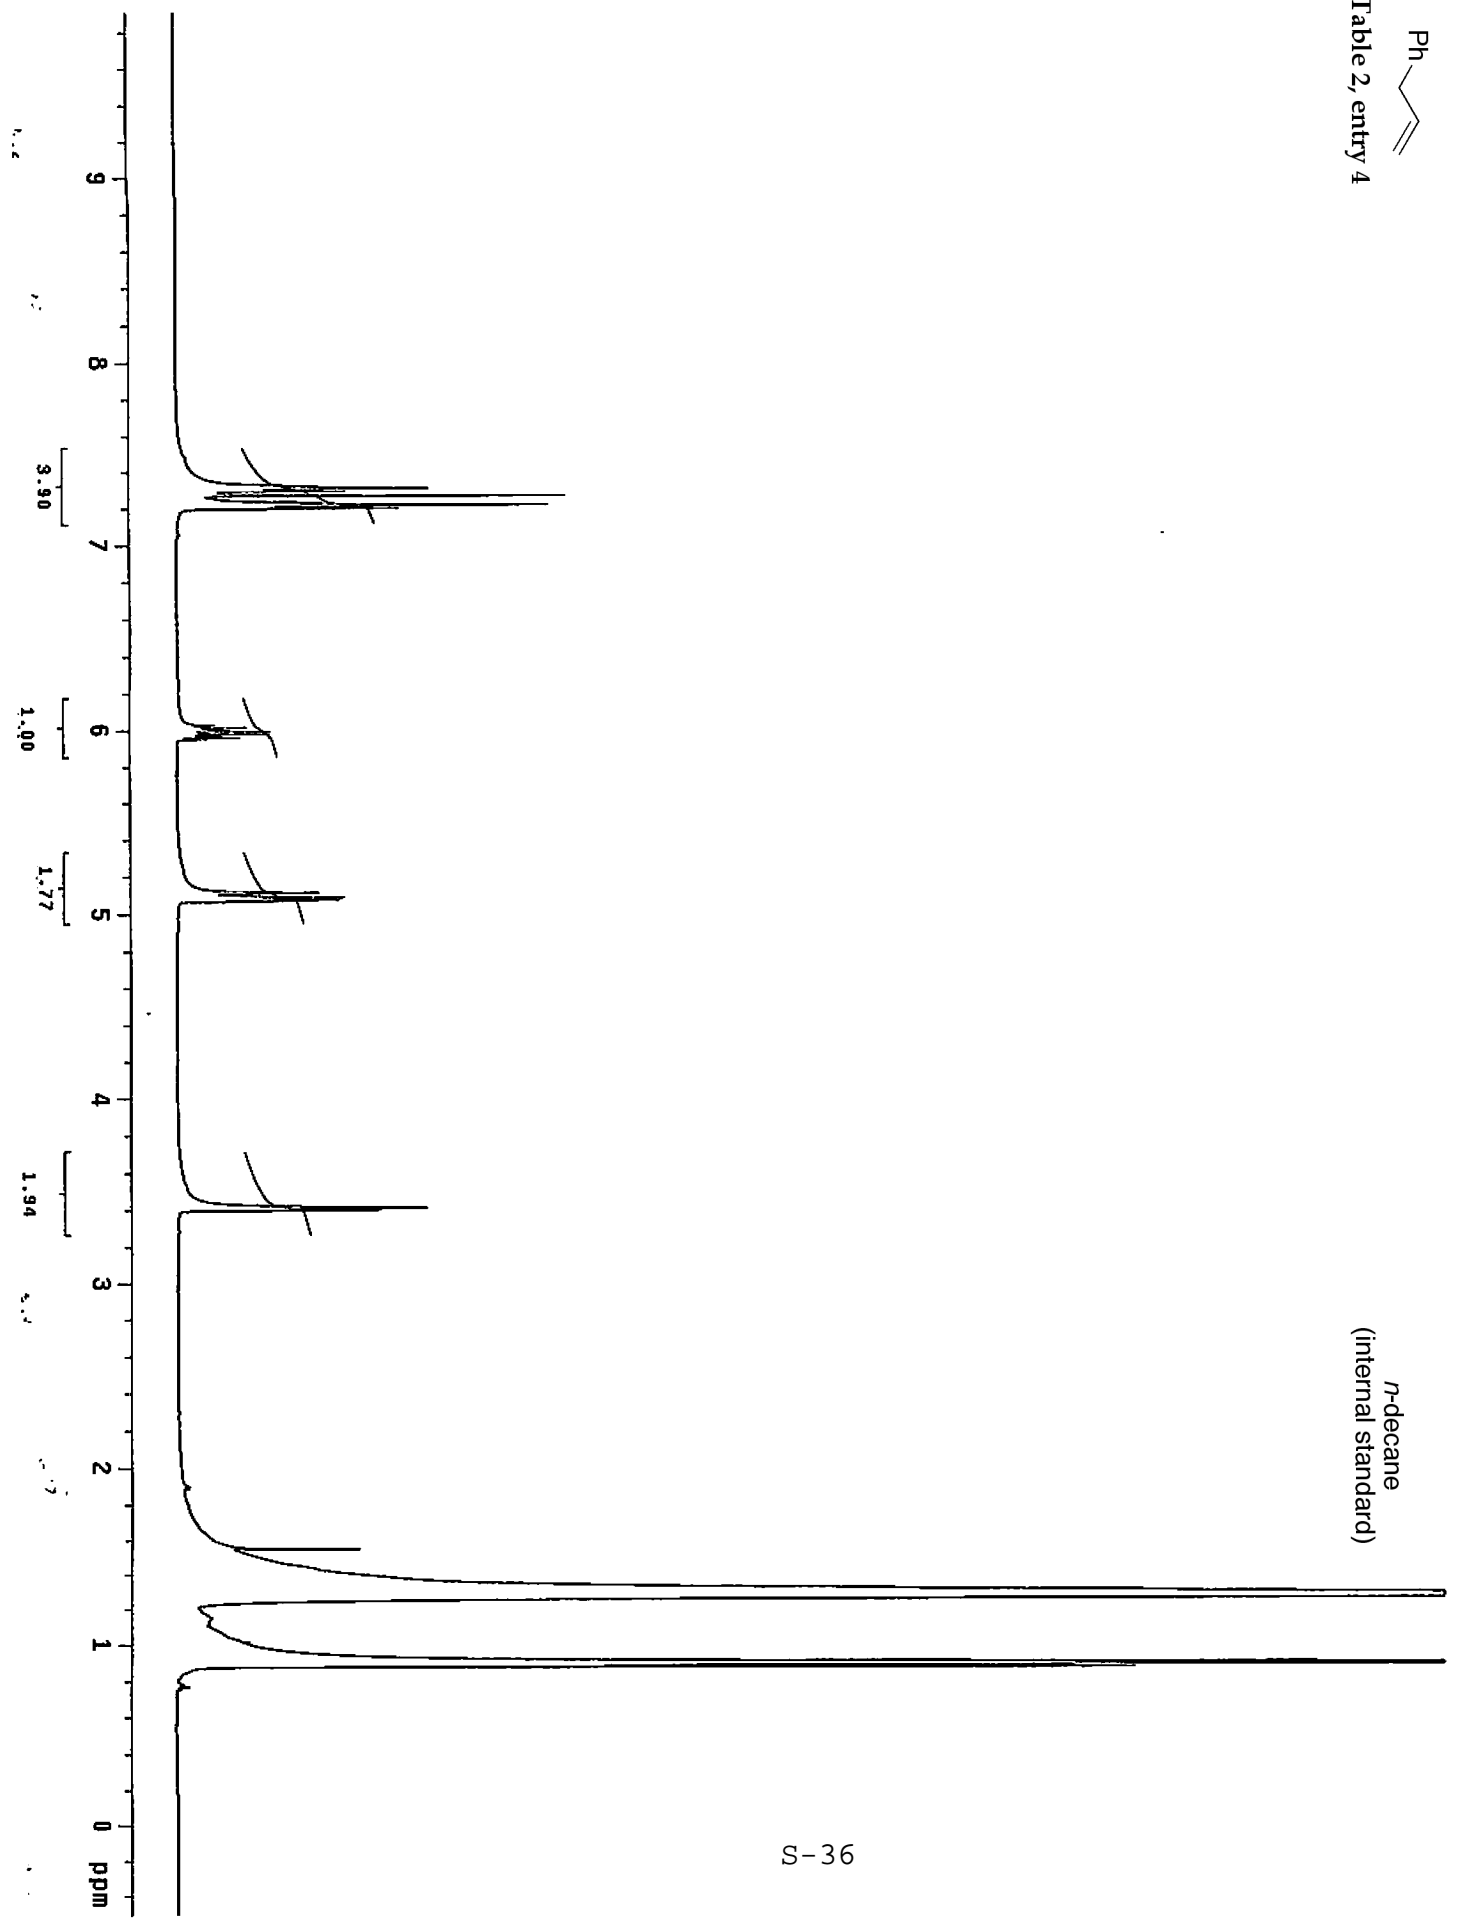

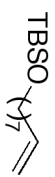

Table 2, entry 5

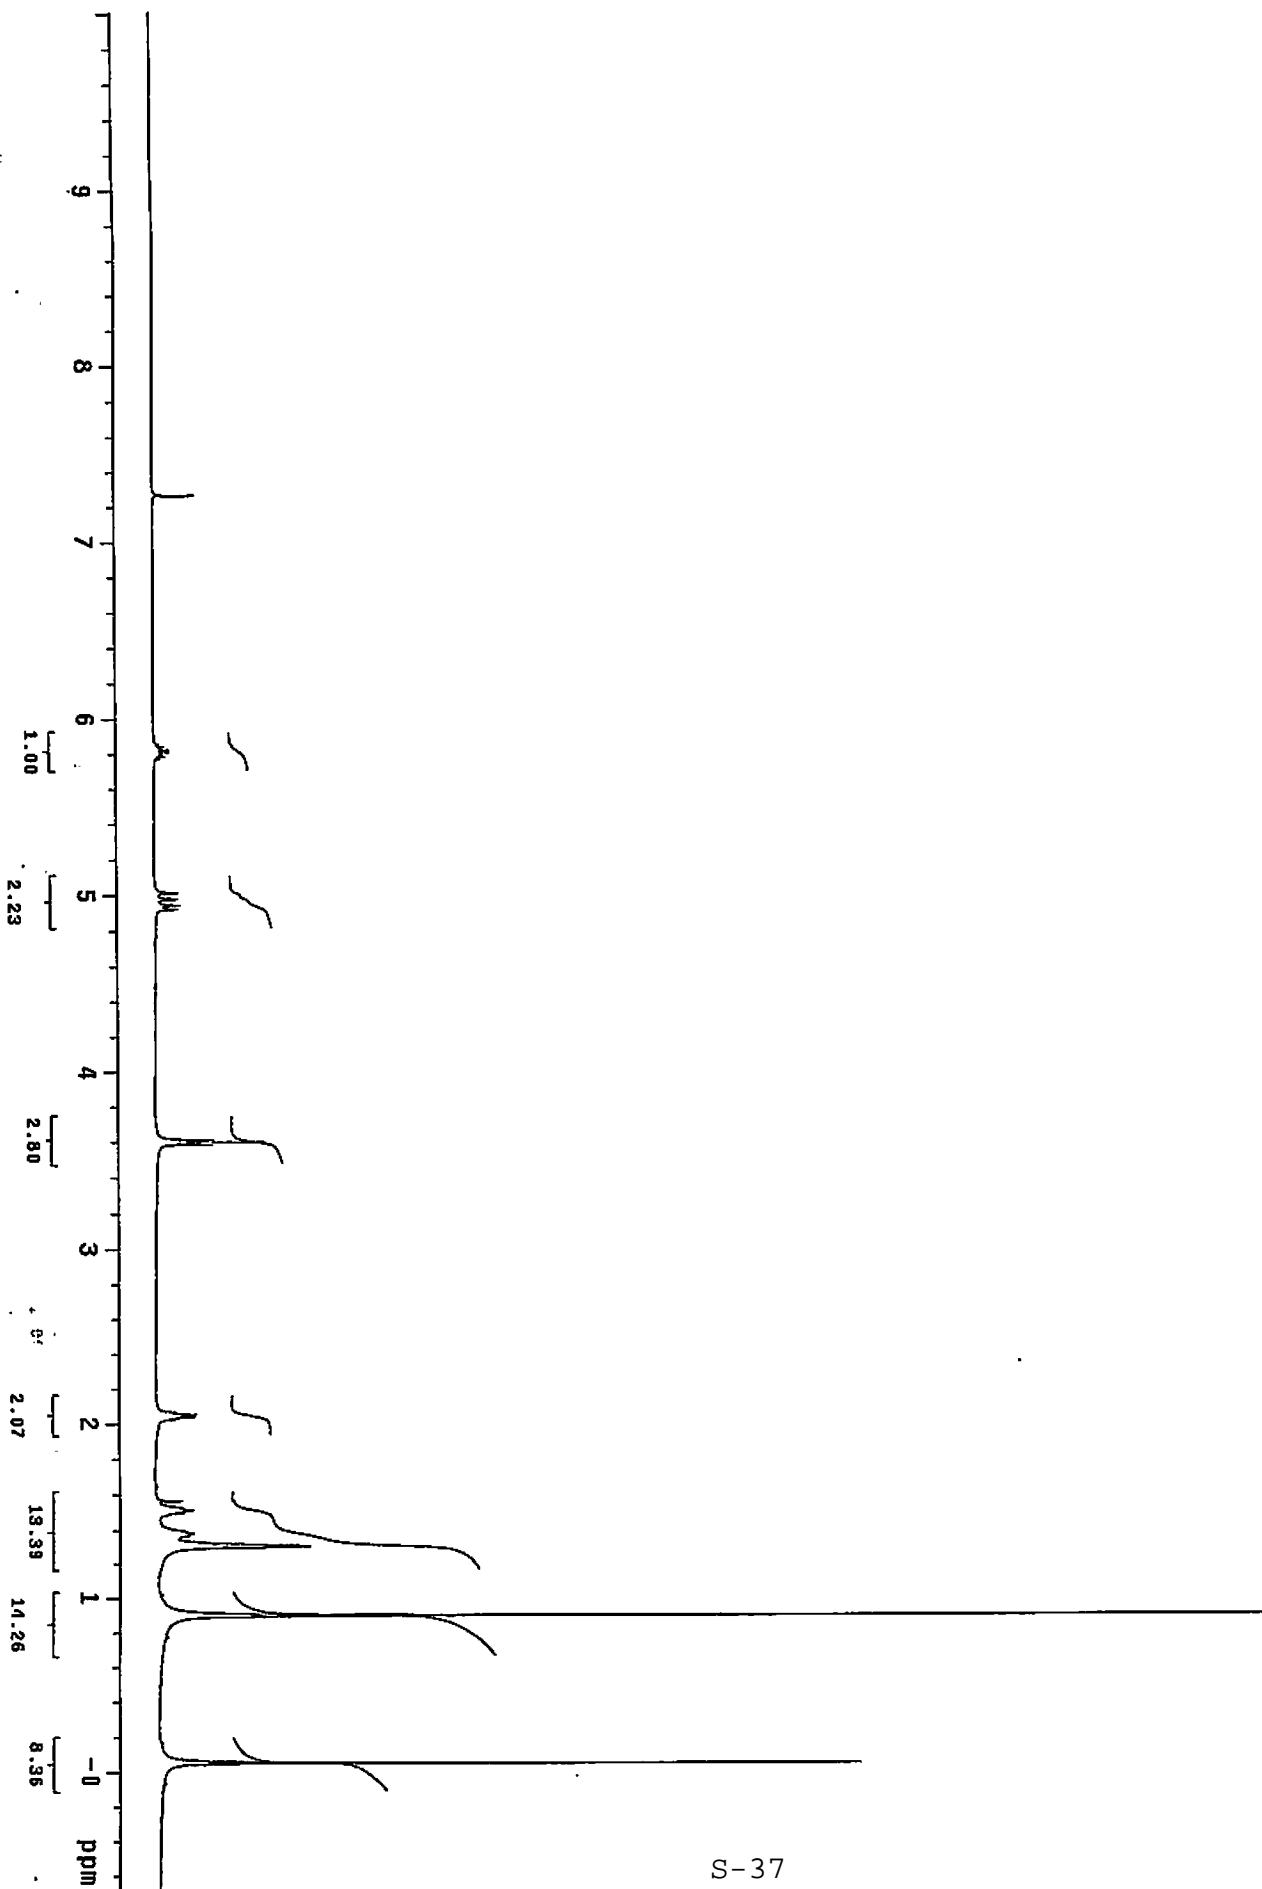

Table 2, entry 6

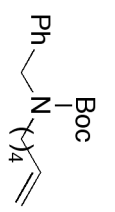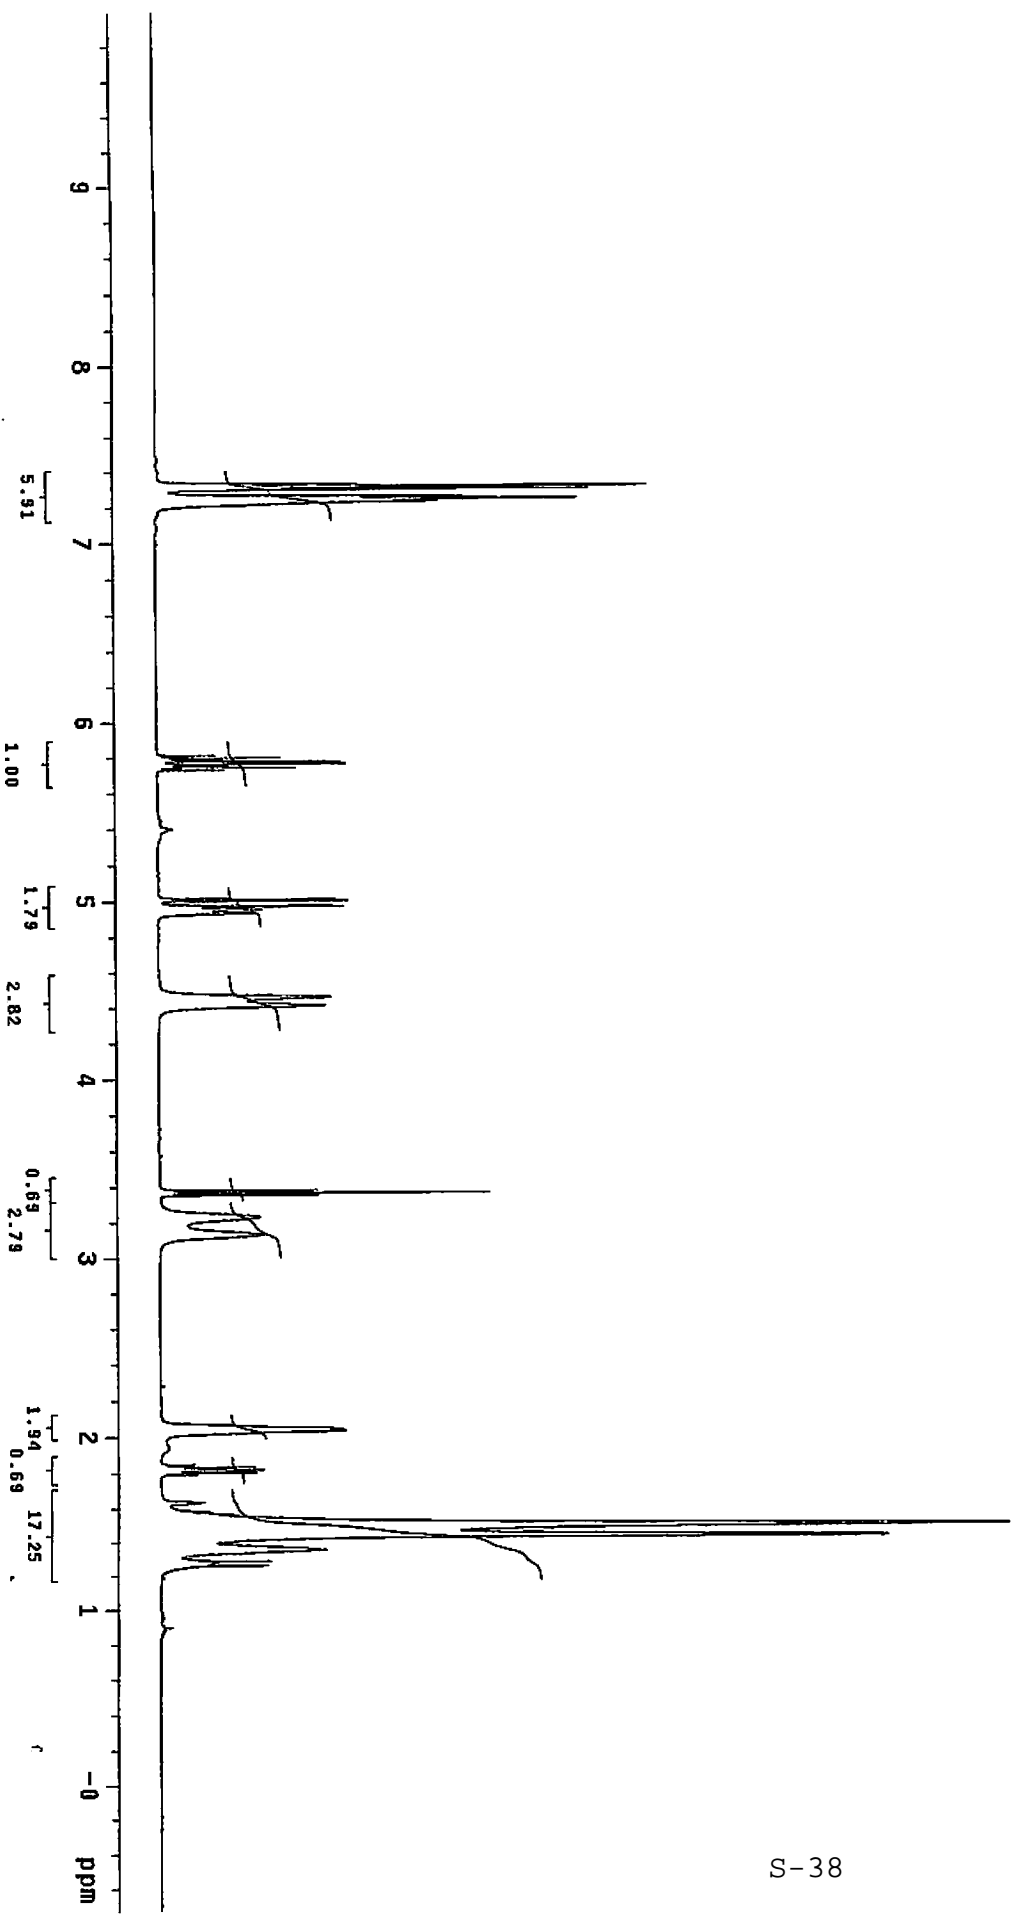

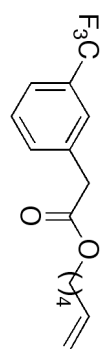

Table 2, entry 7

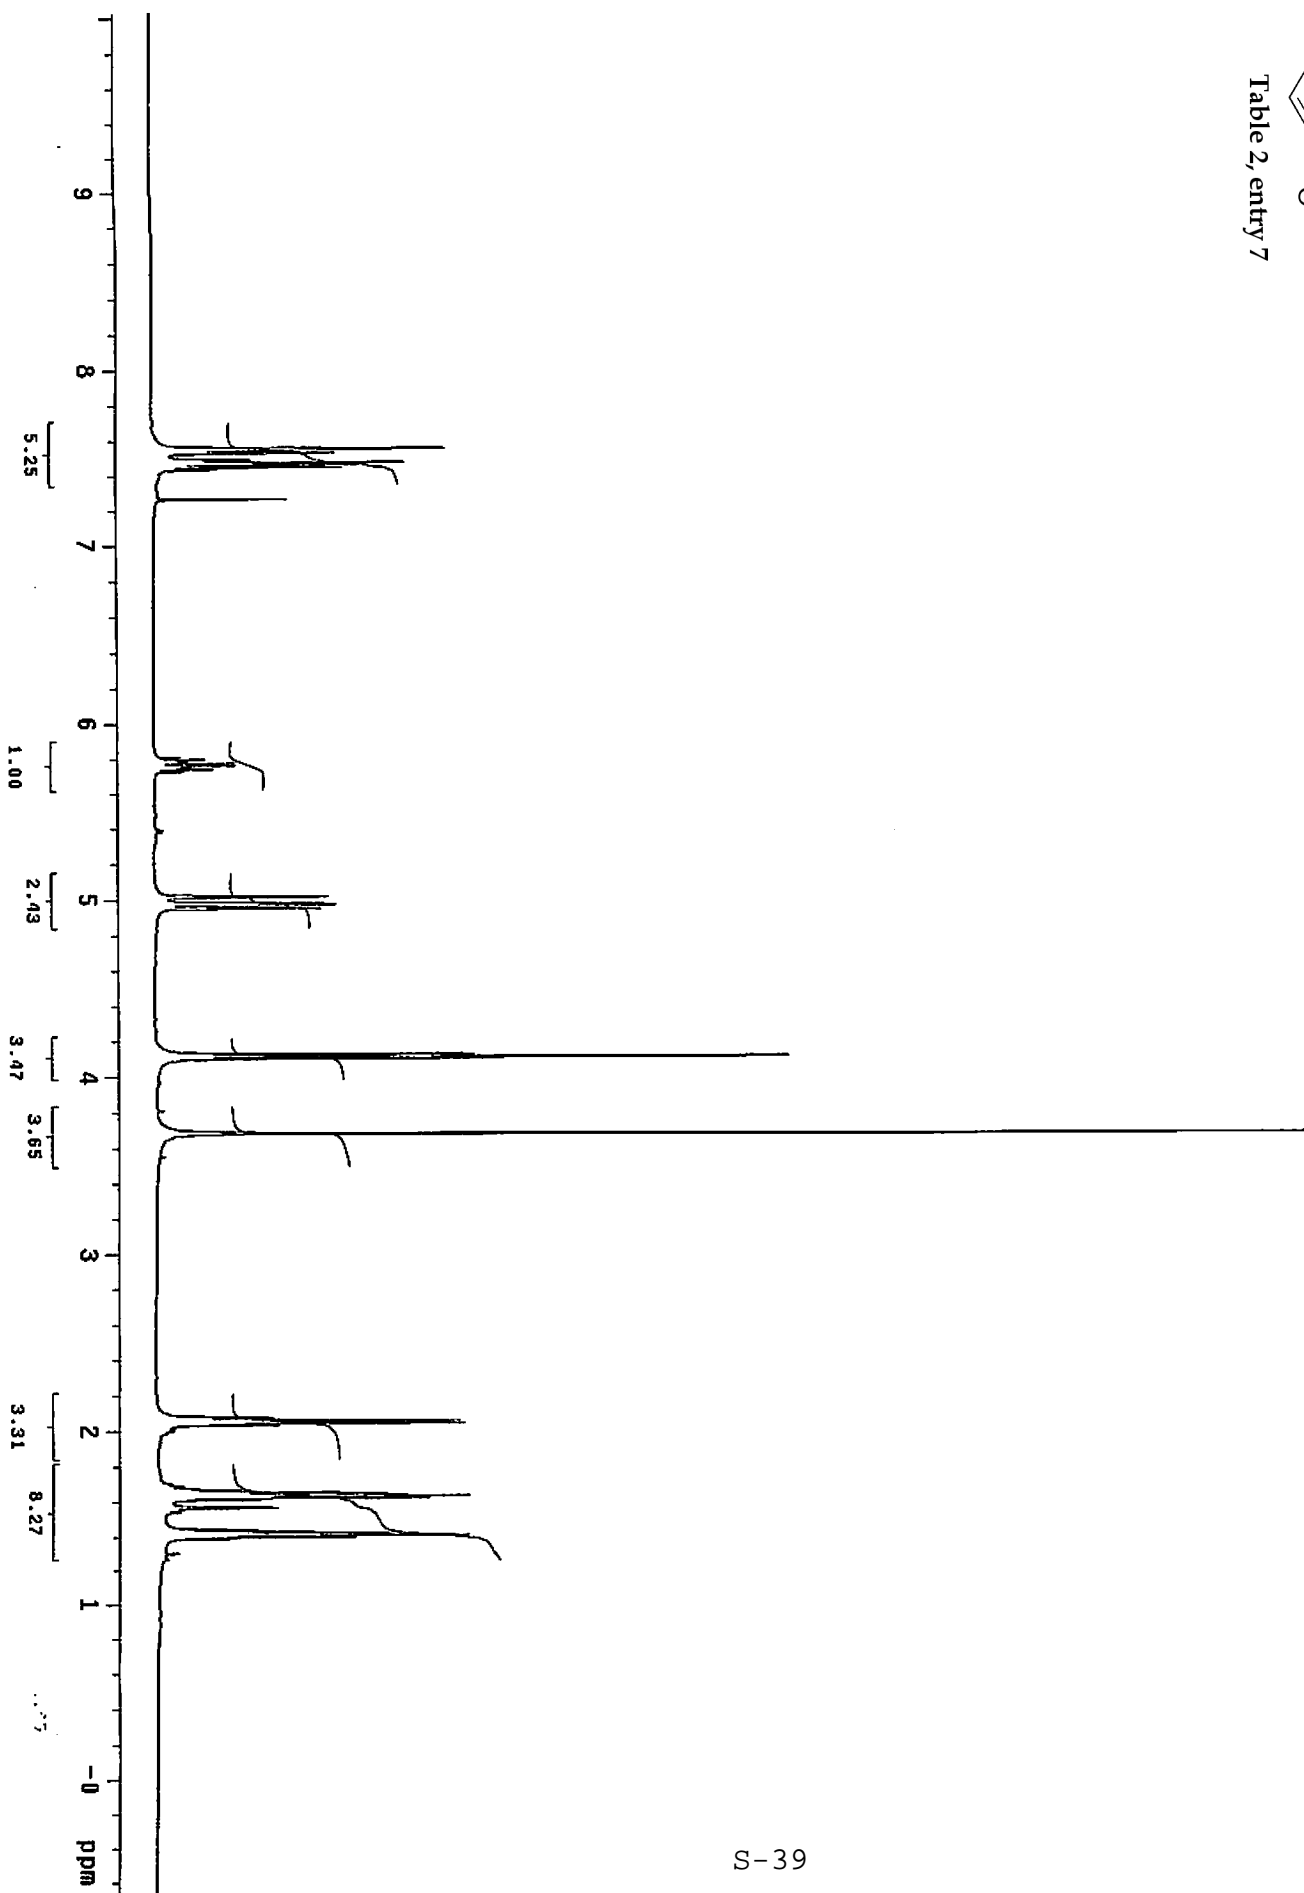

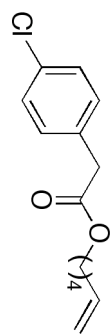

Table 2, entry 8

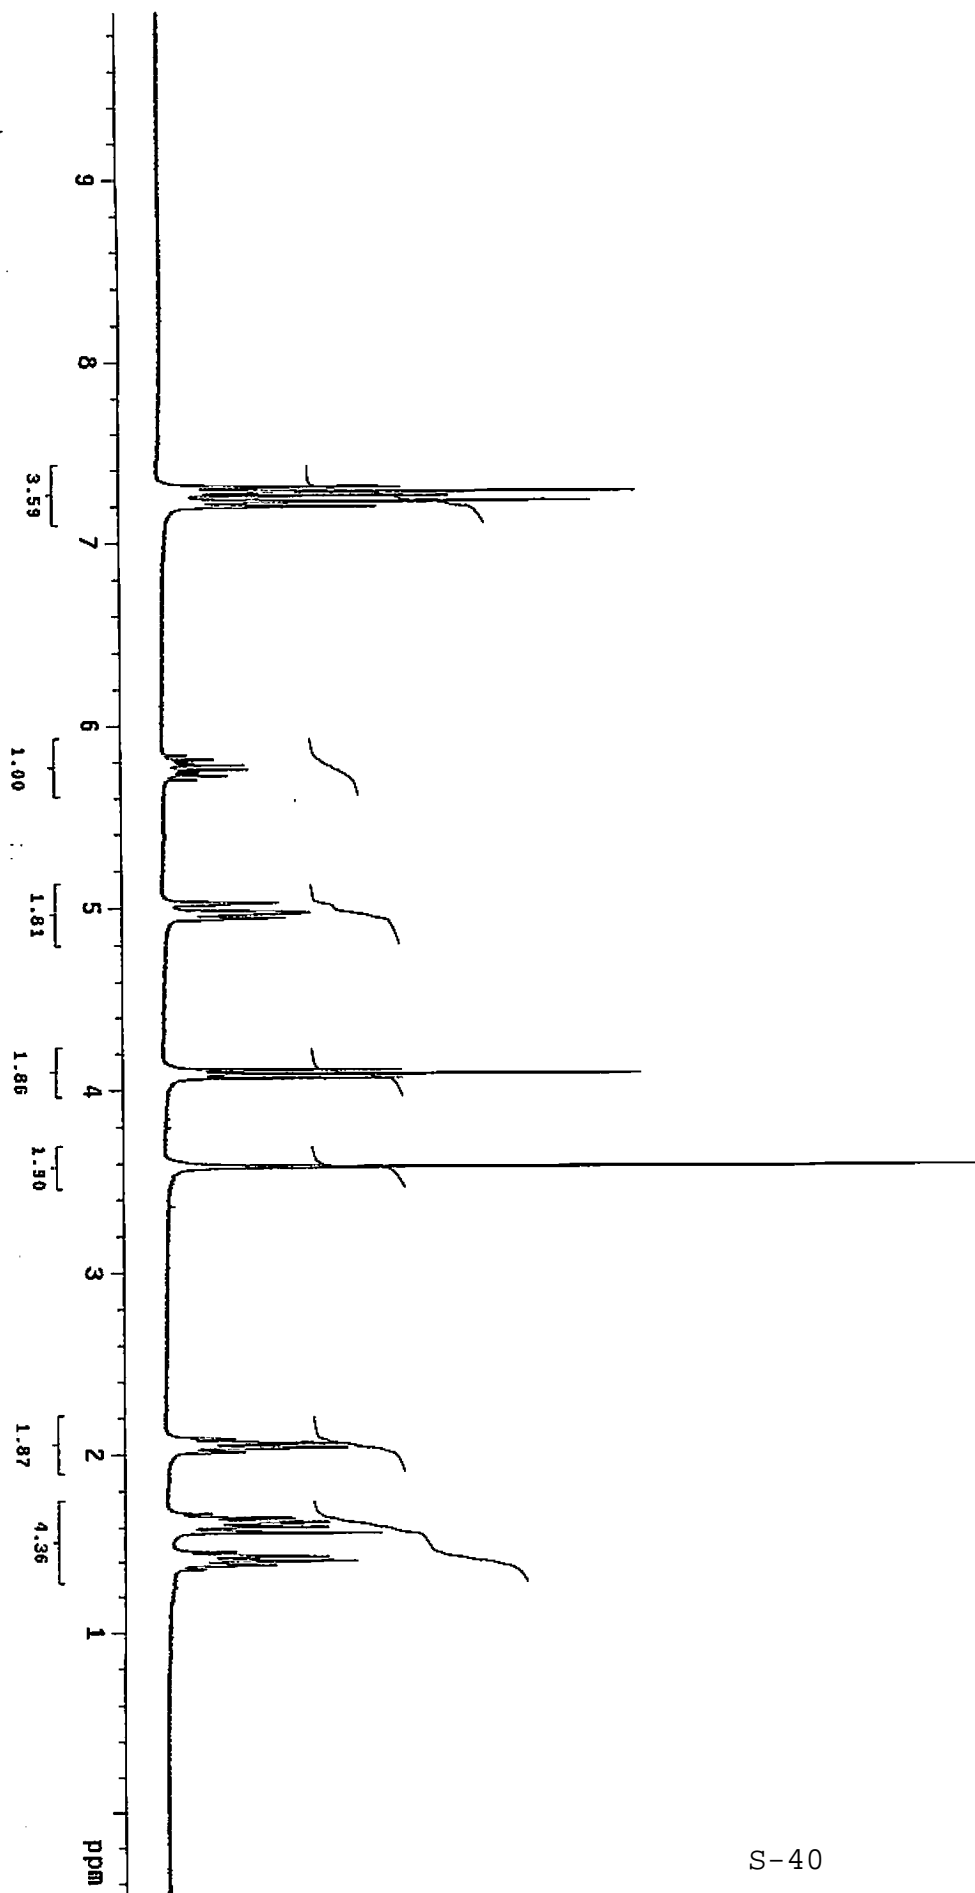



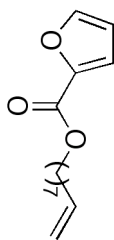

Table 2, entry 9

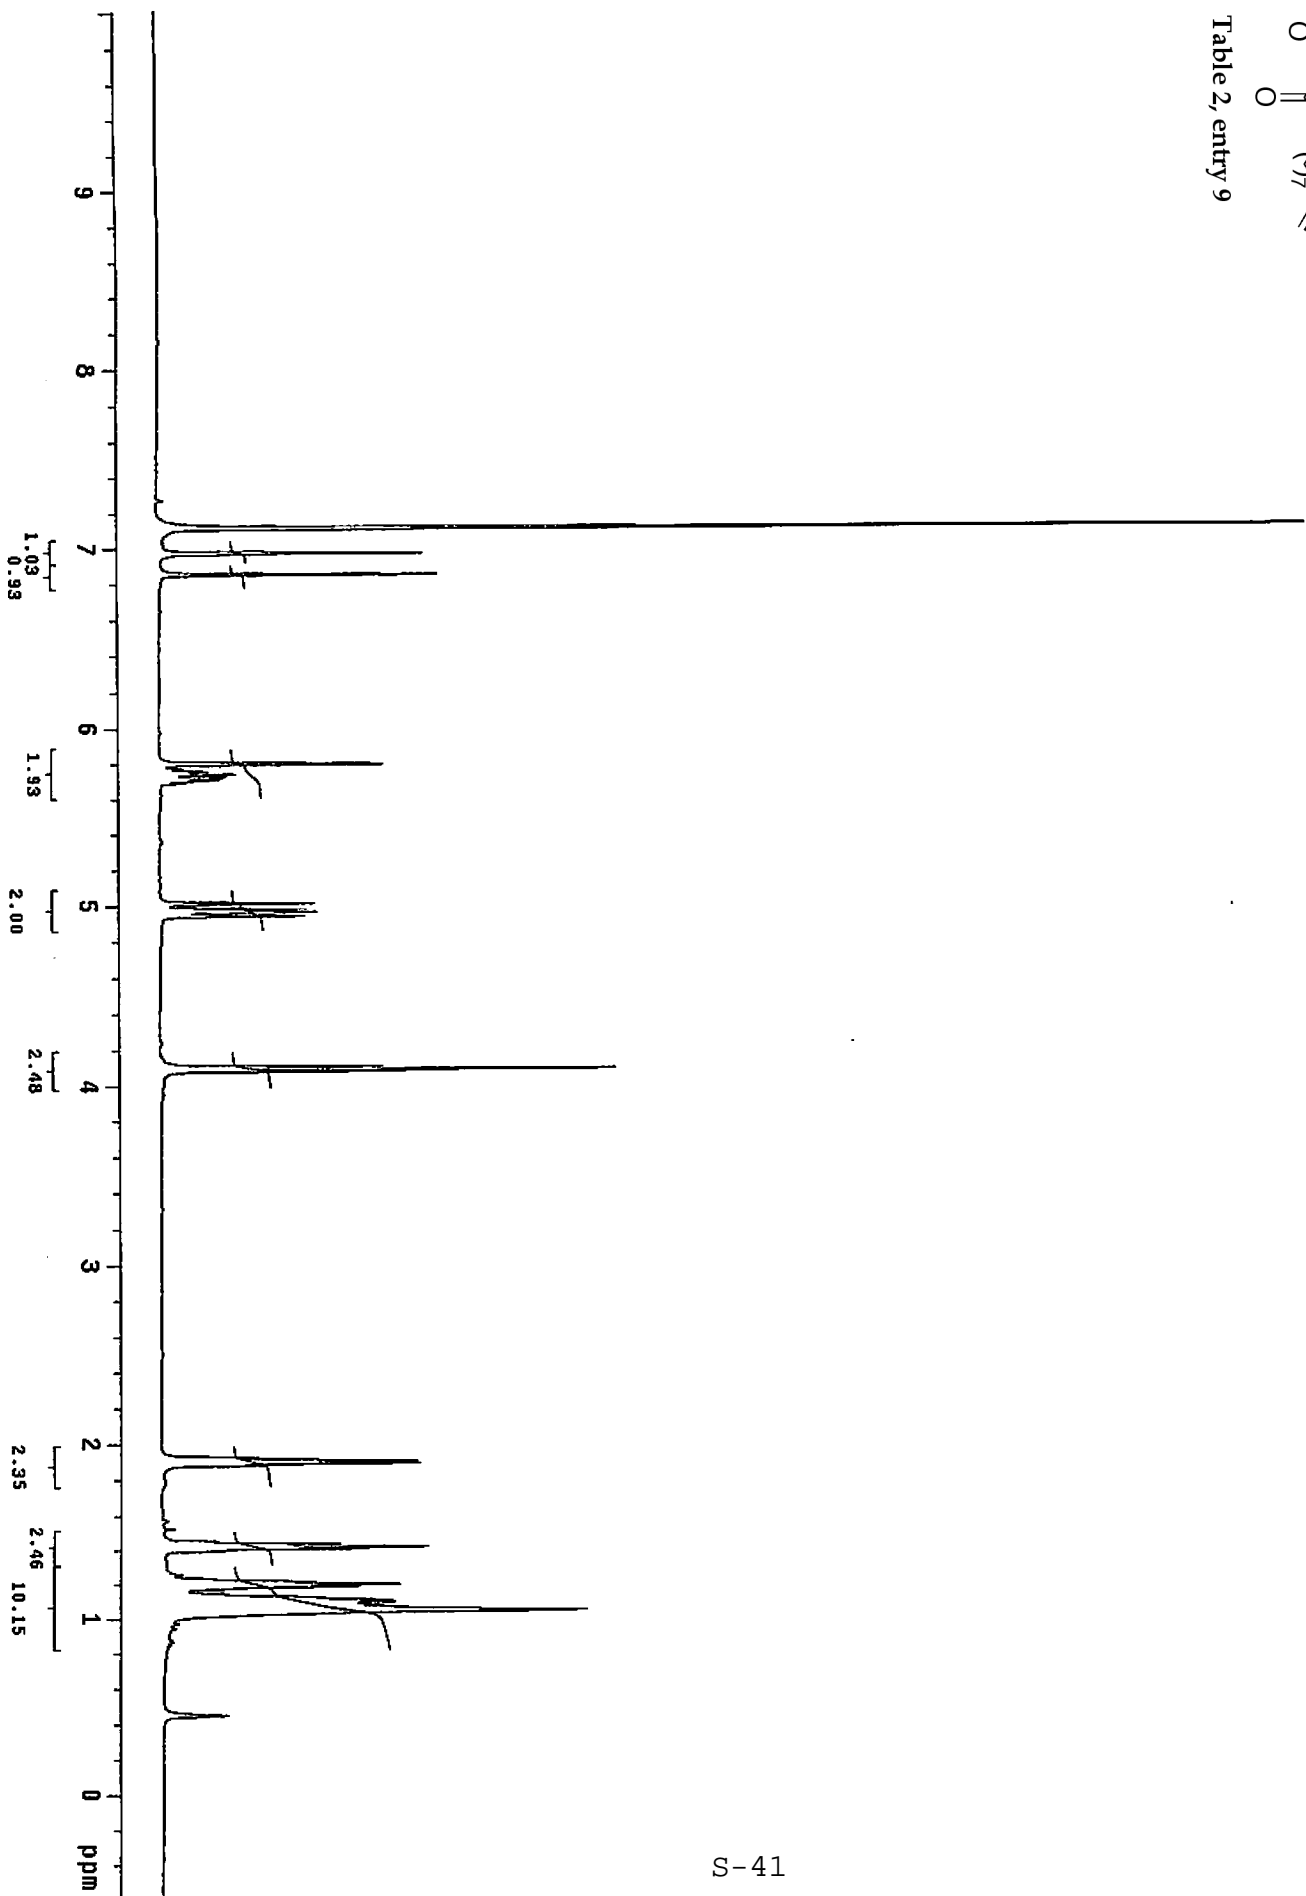

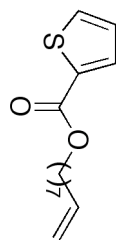

Table 2, entry 10

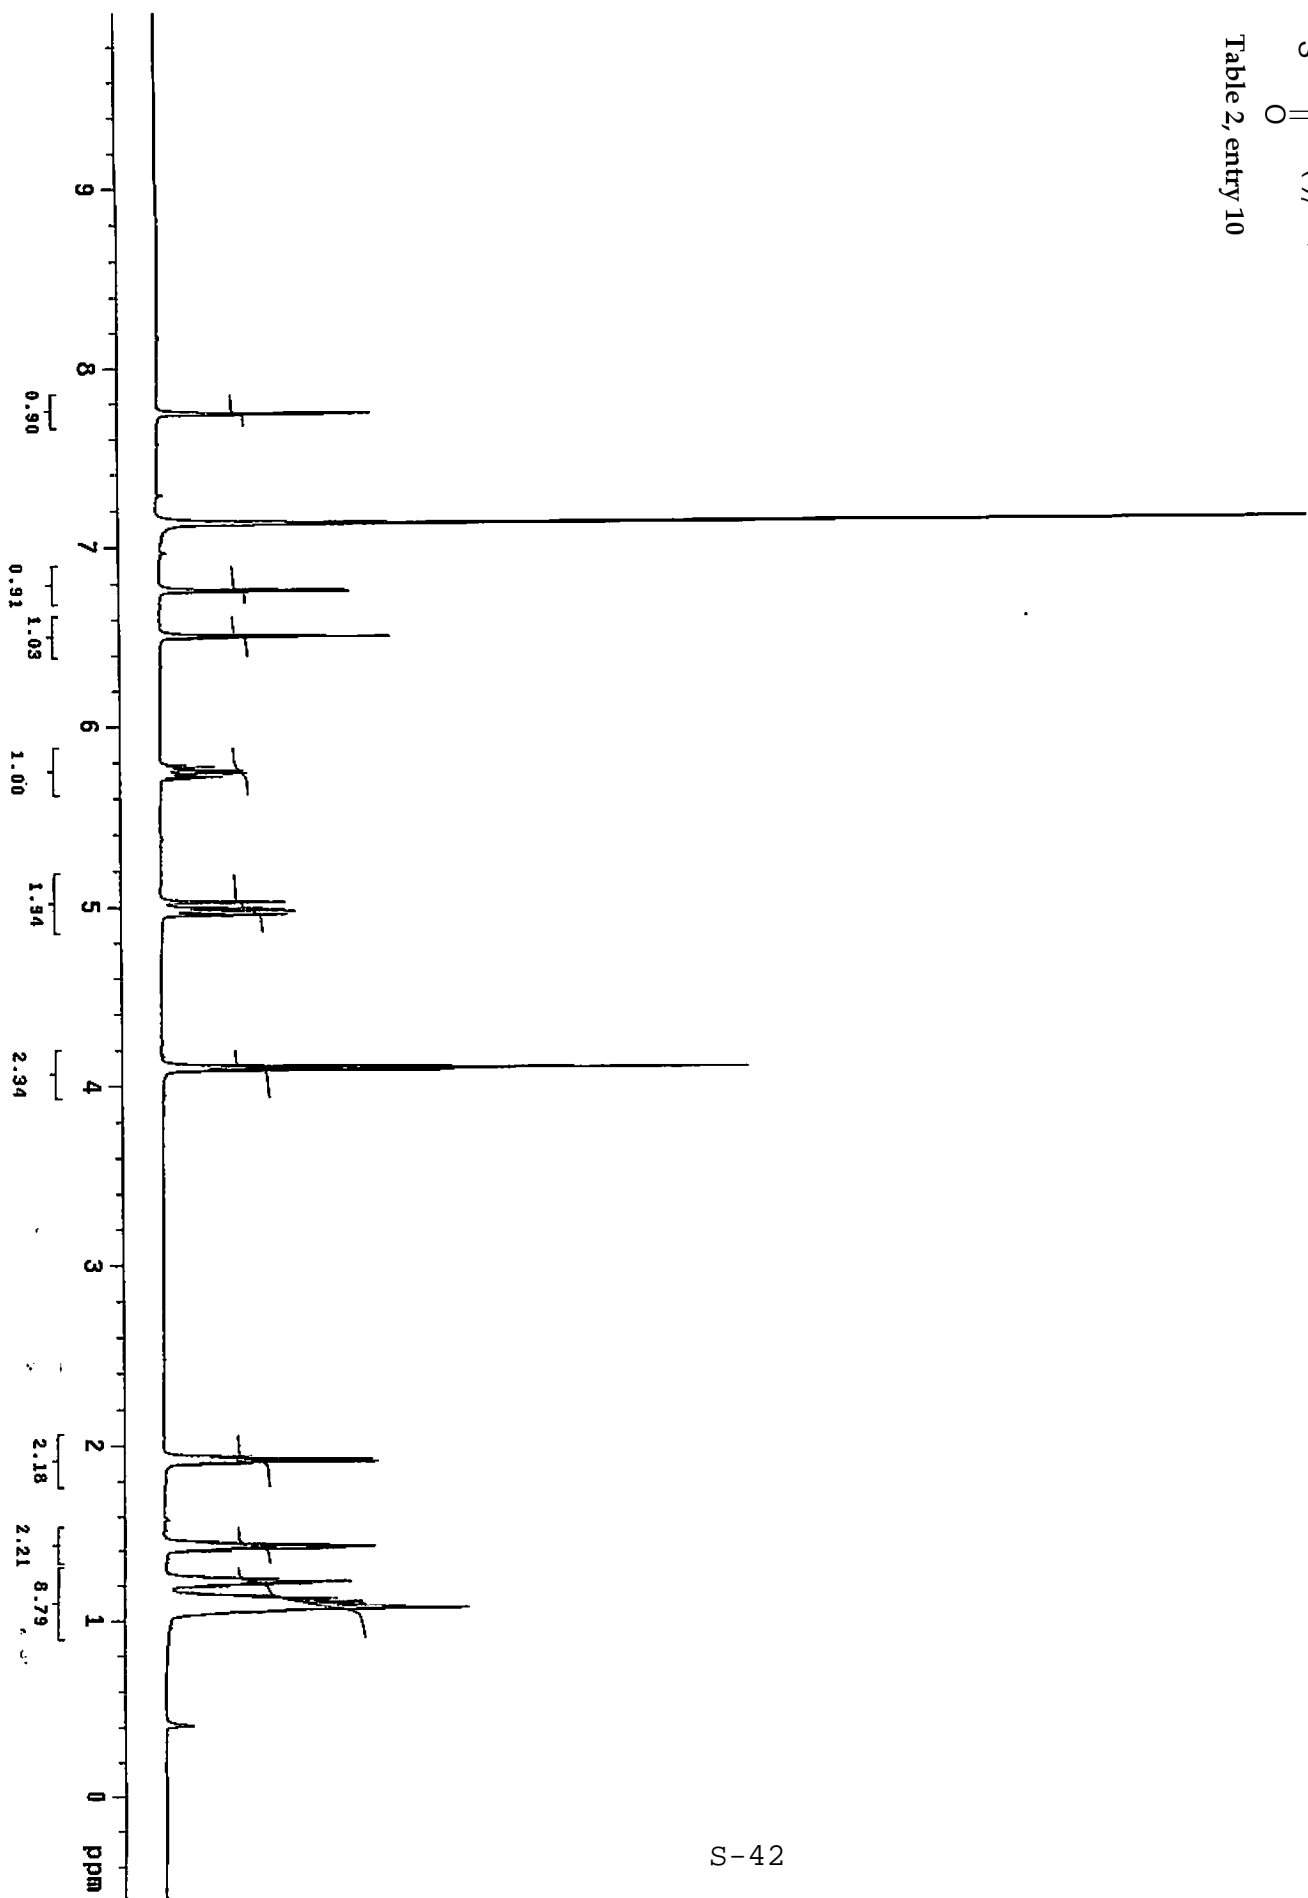

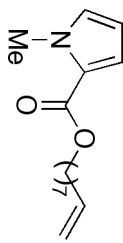

Table 2, entry 11

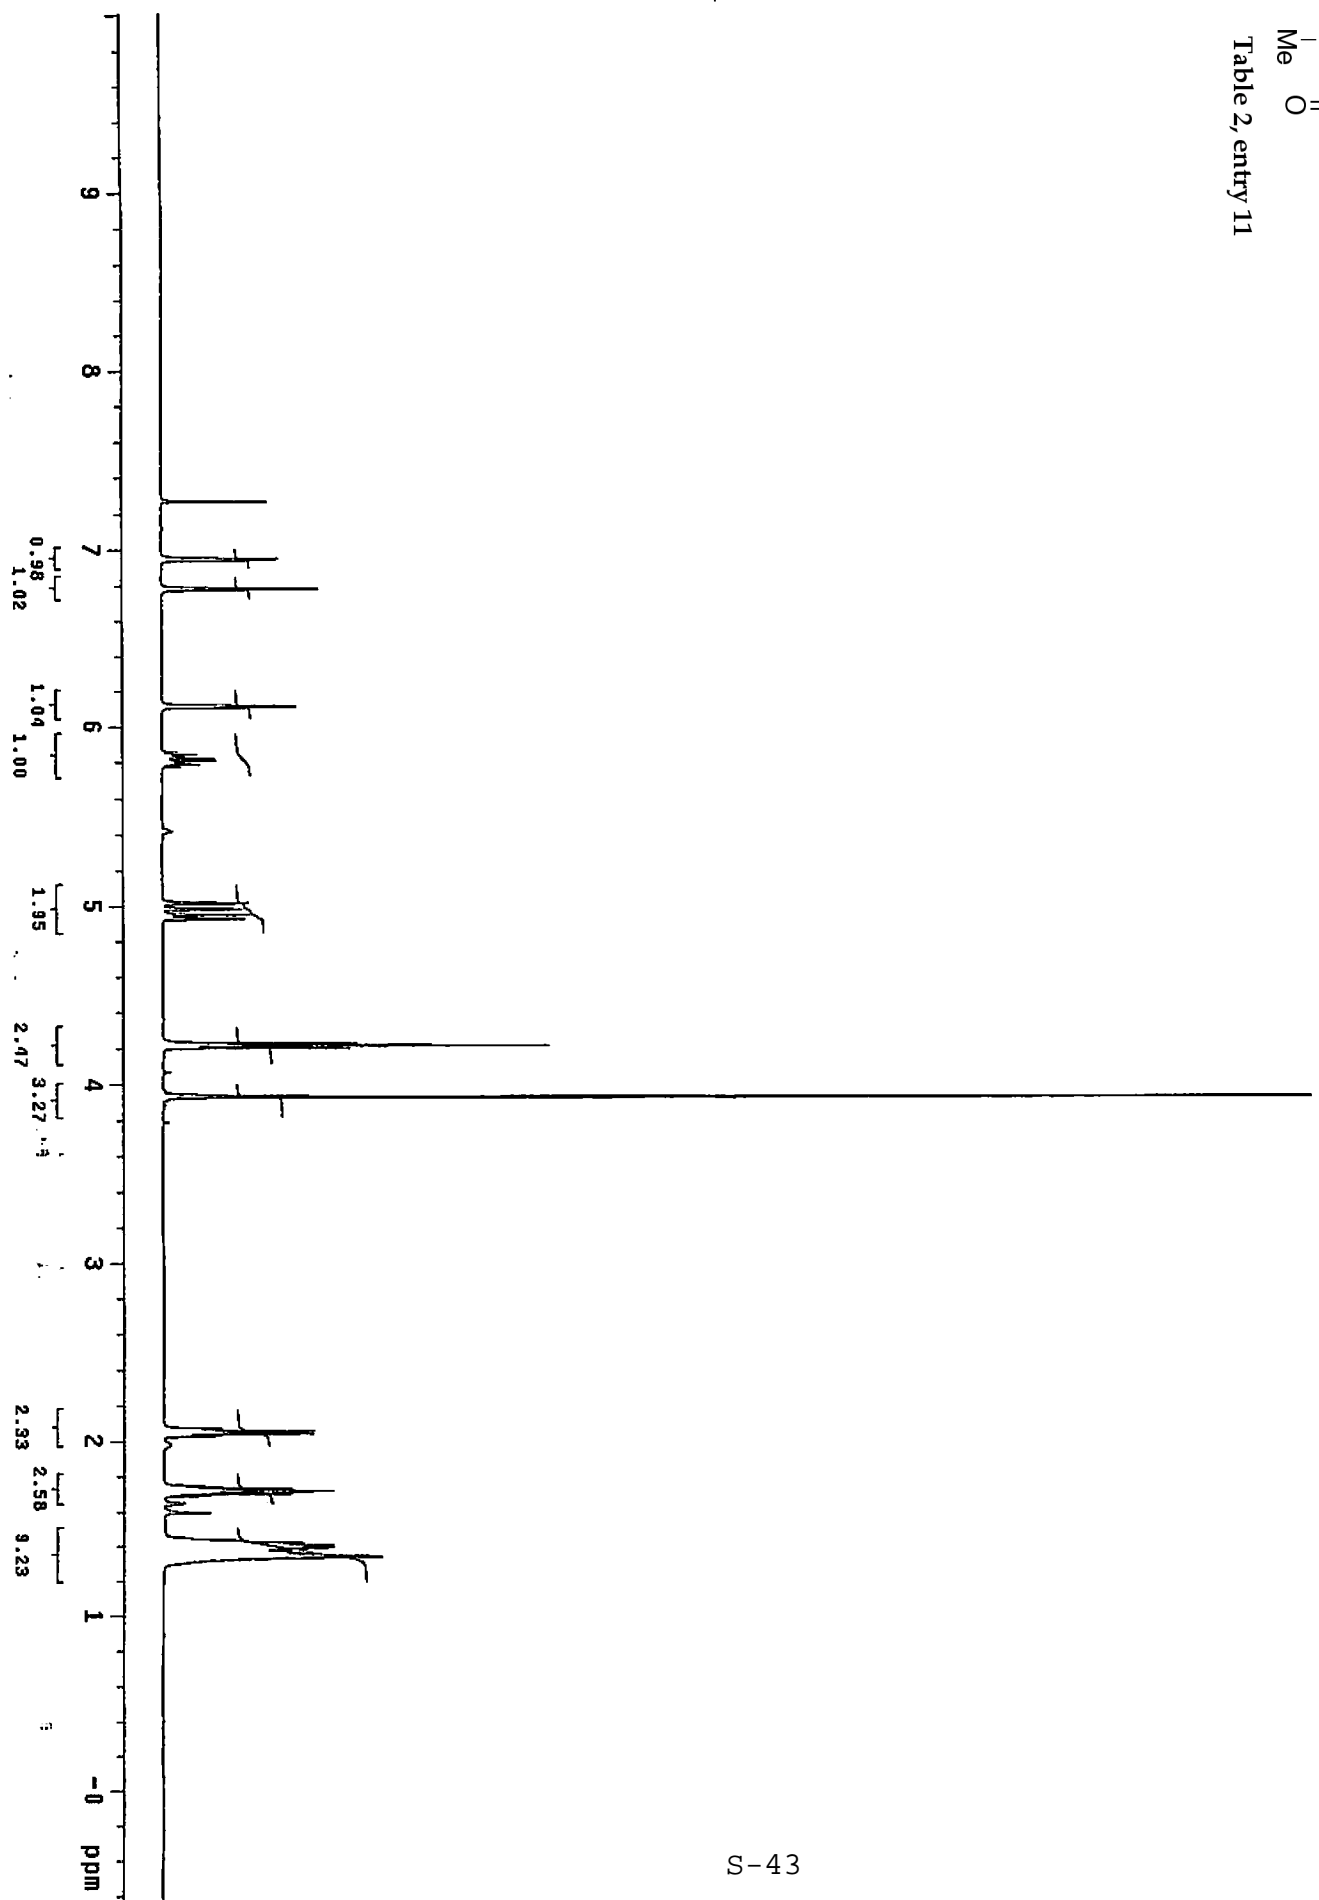

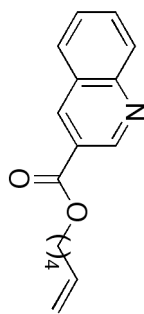

Table 2, entry 12

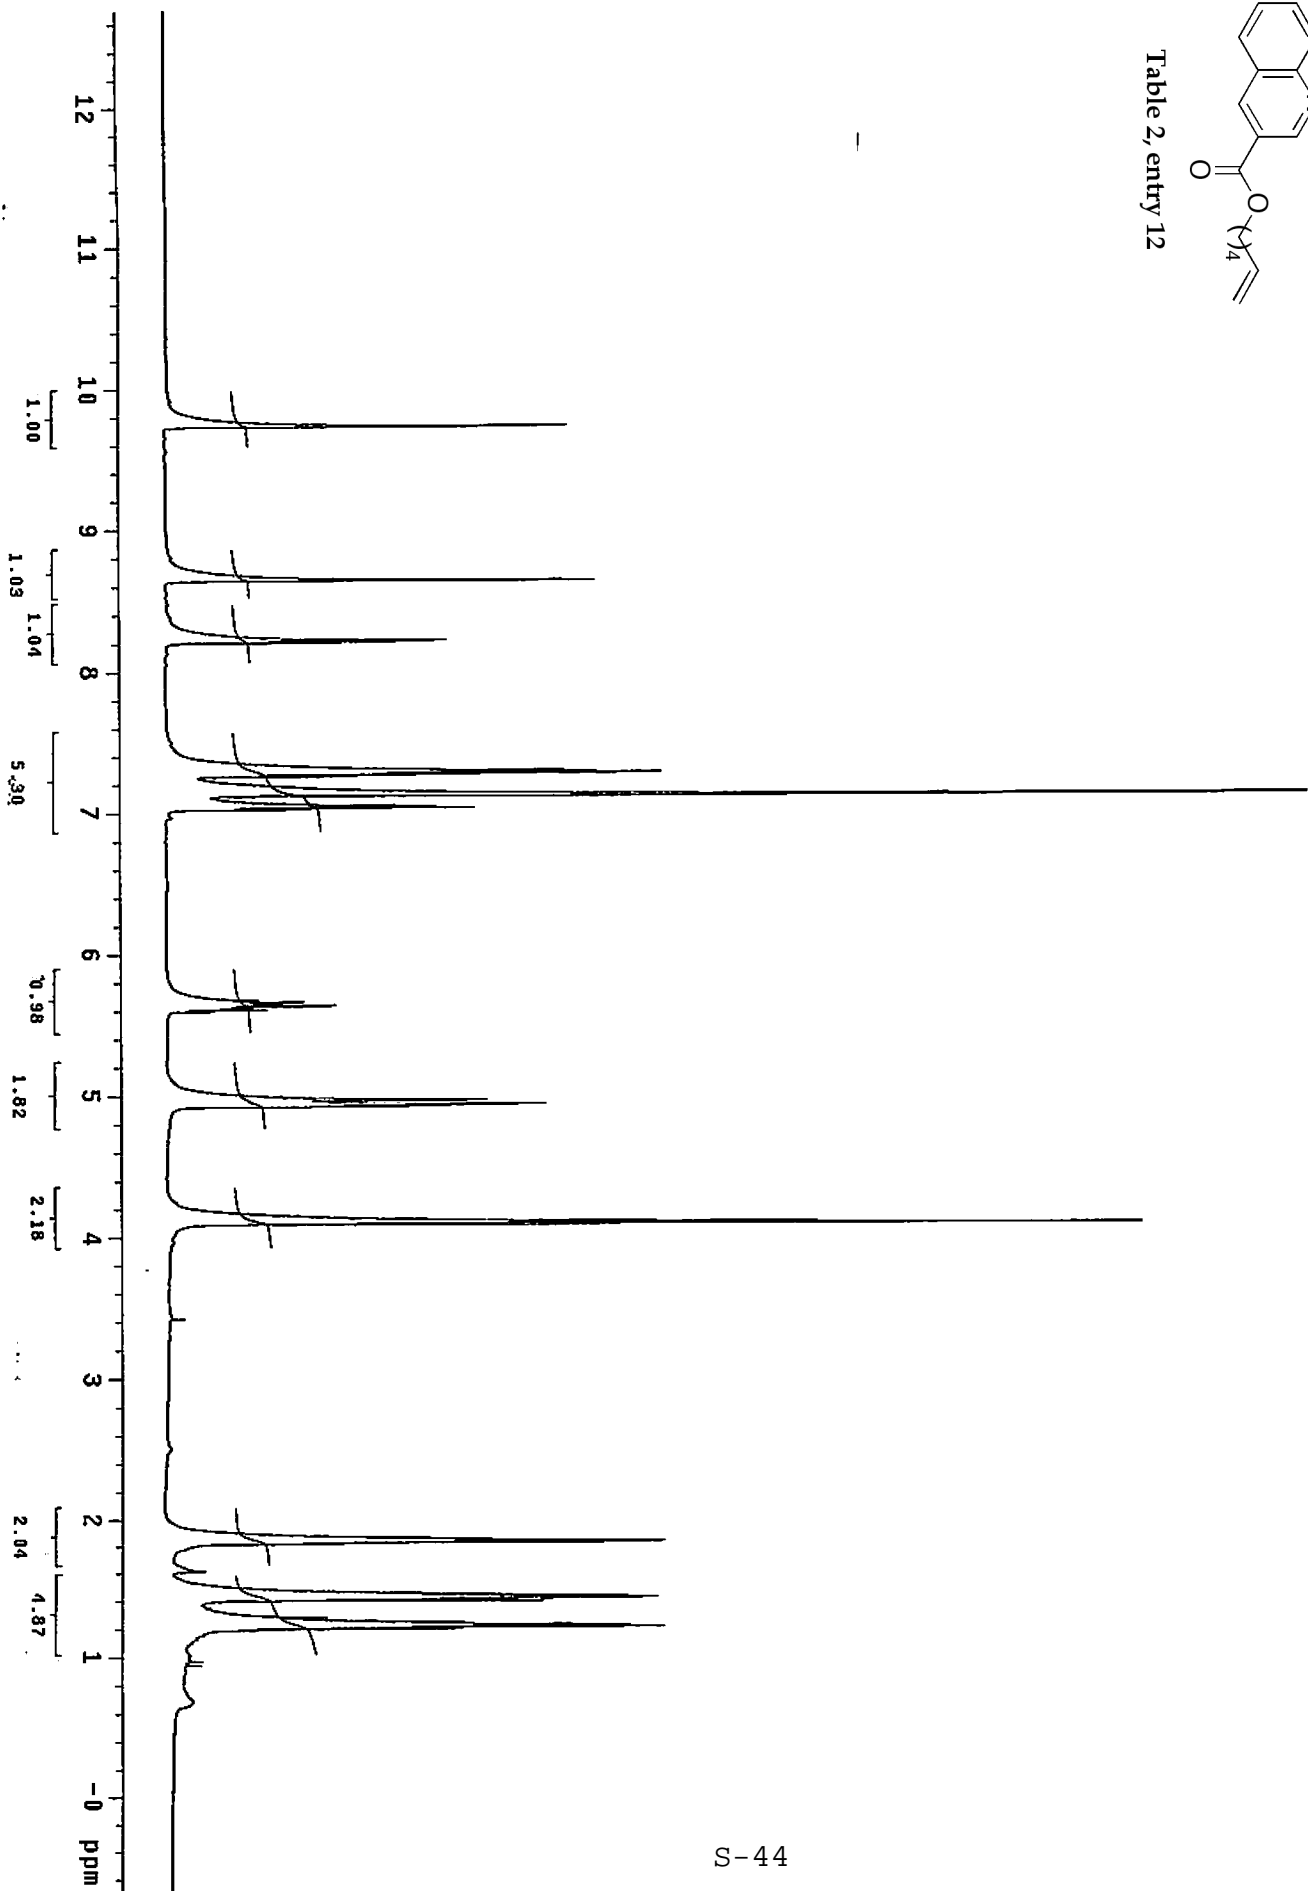

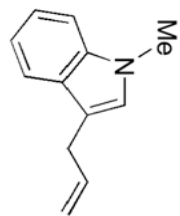

Table 2, entry 13

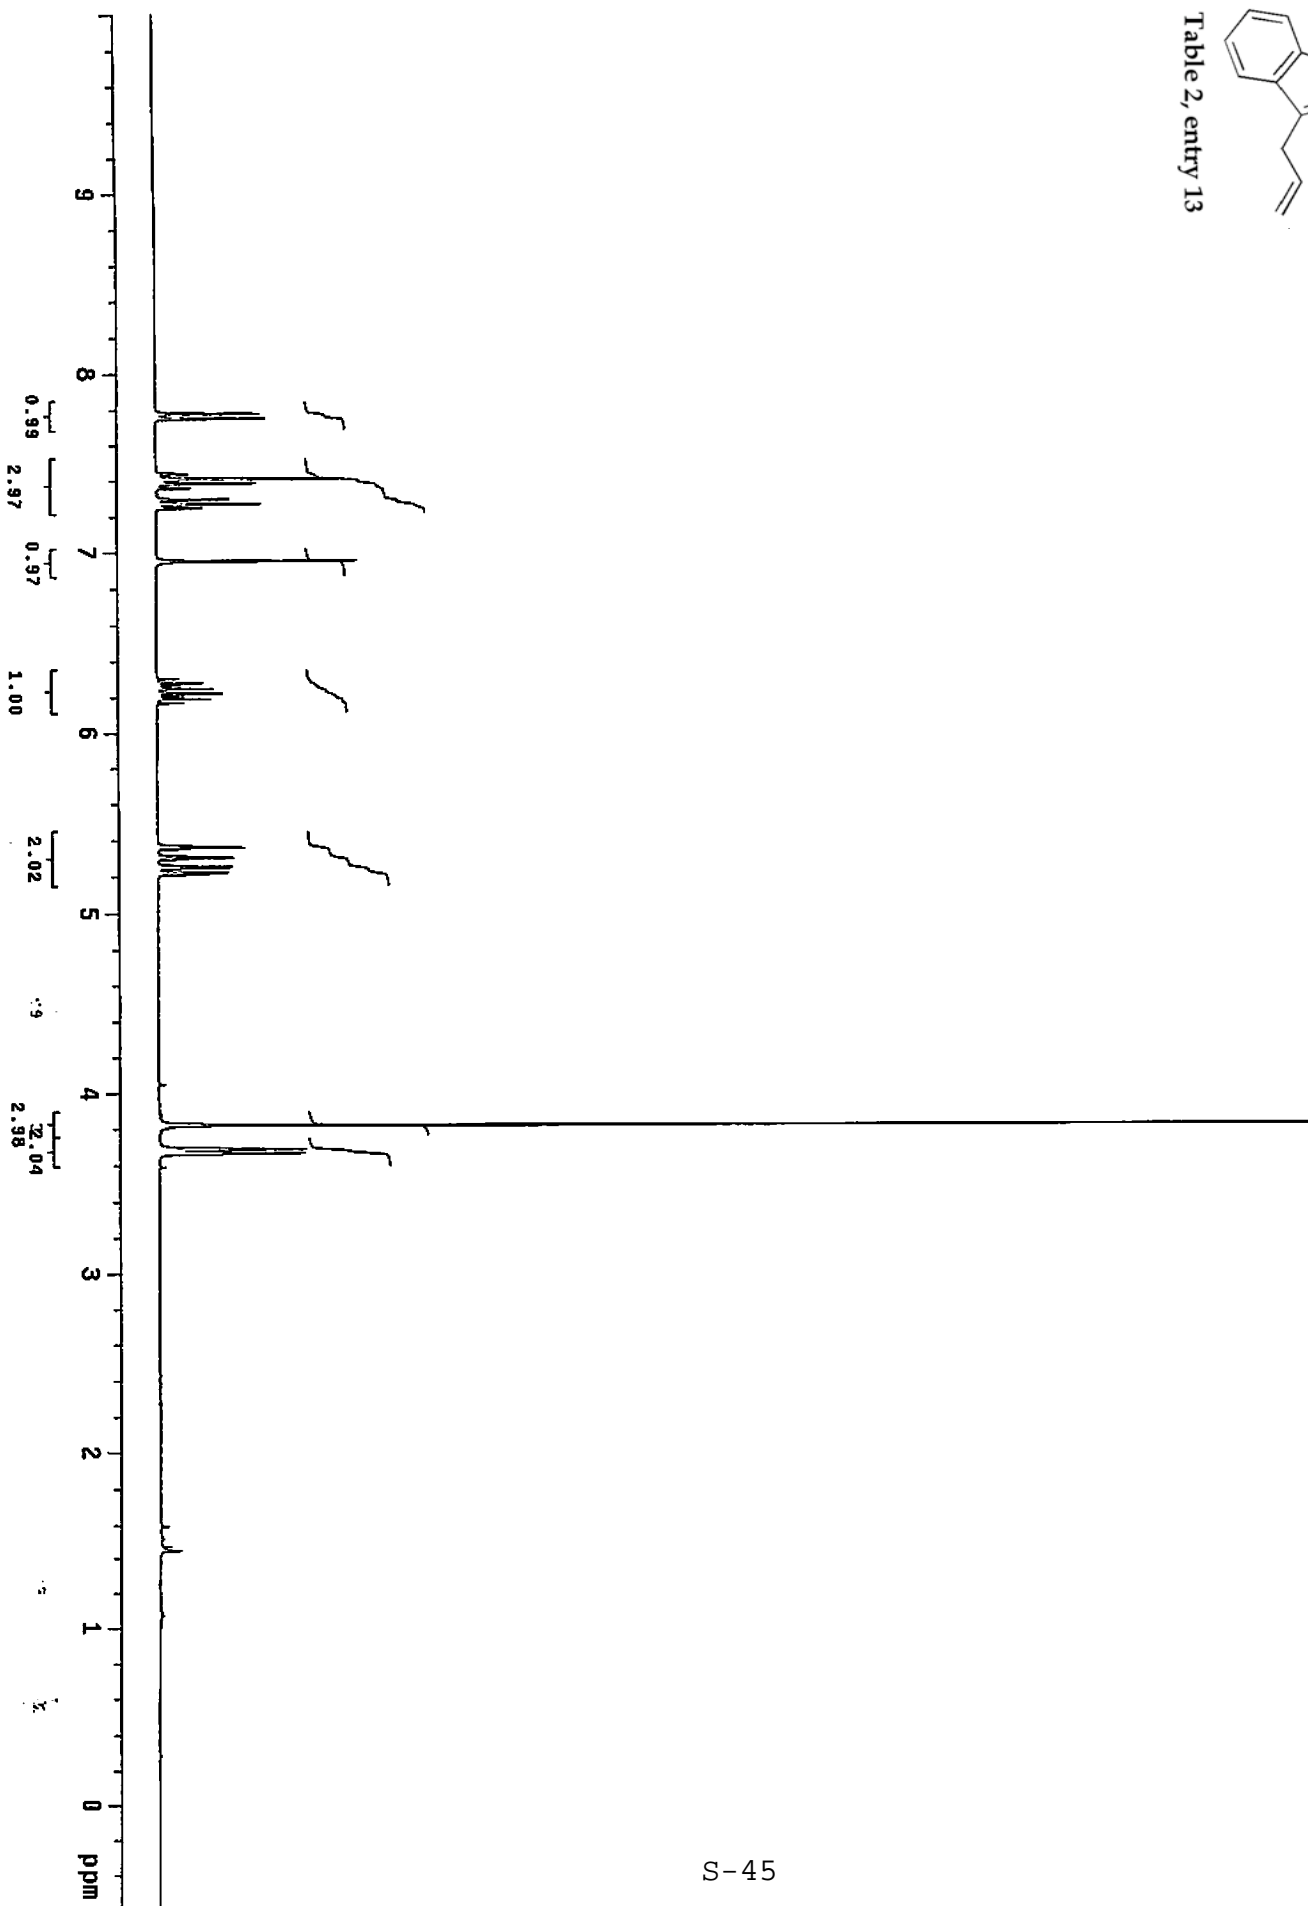

C6H13C(=O)C=C  
Table 2, entry 14

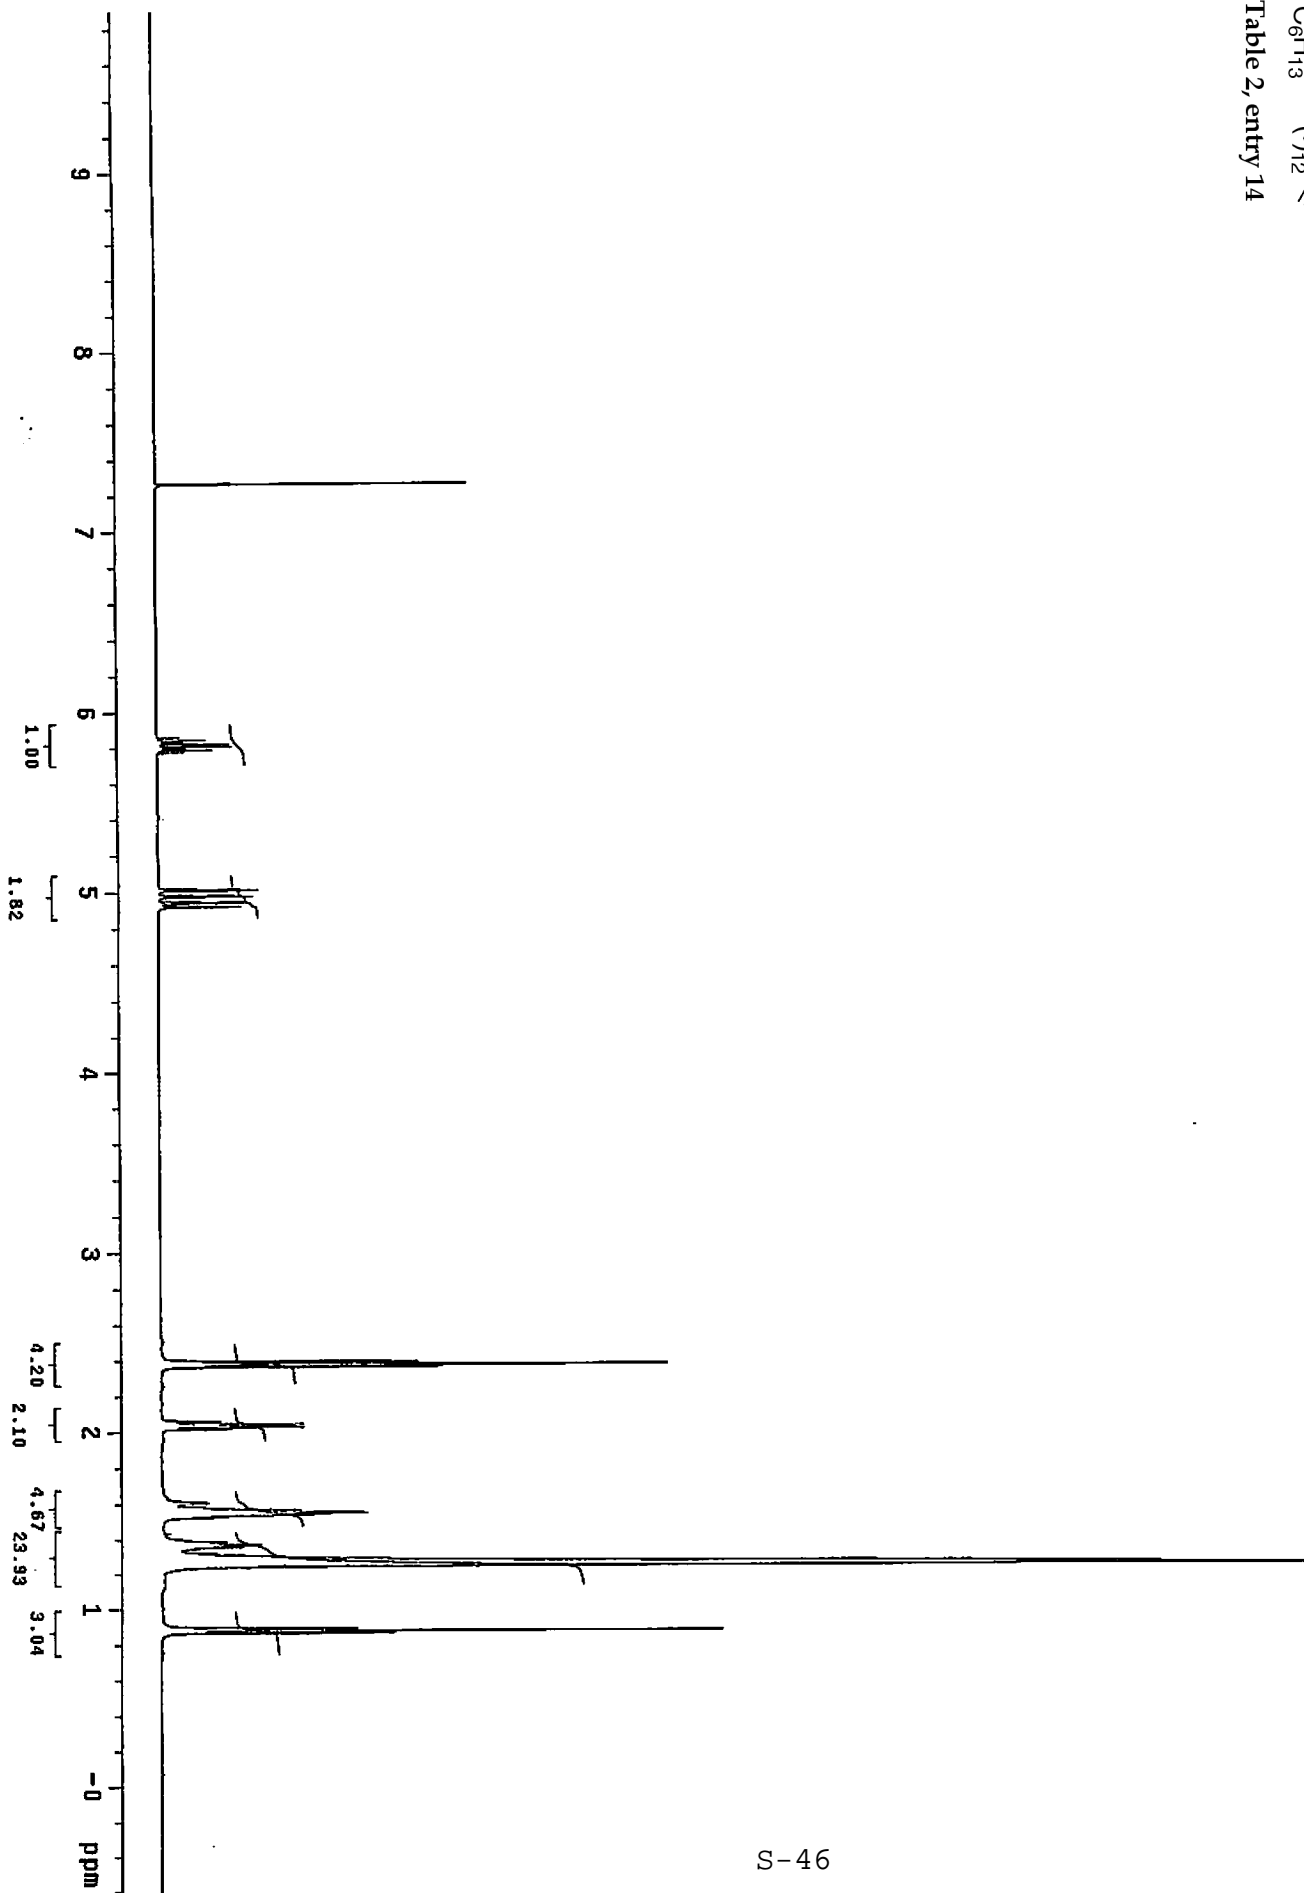

Table 2, entry 15

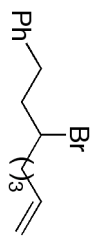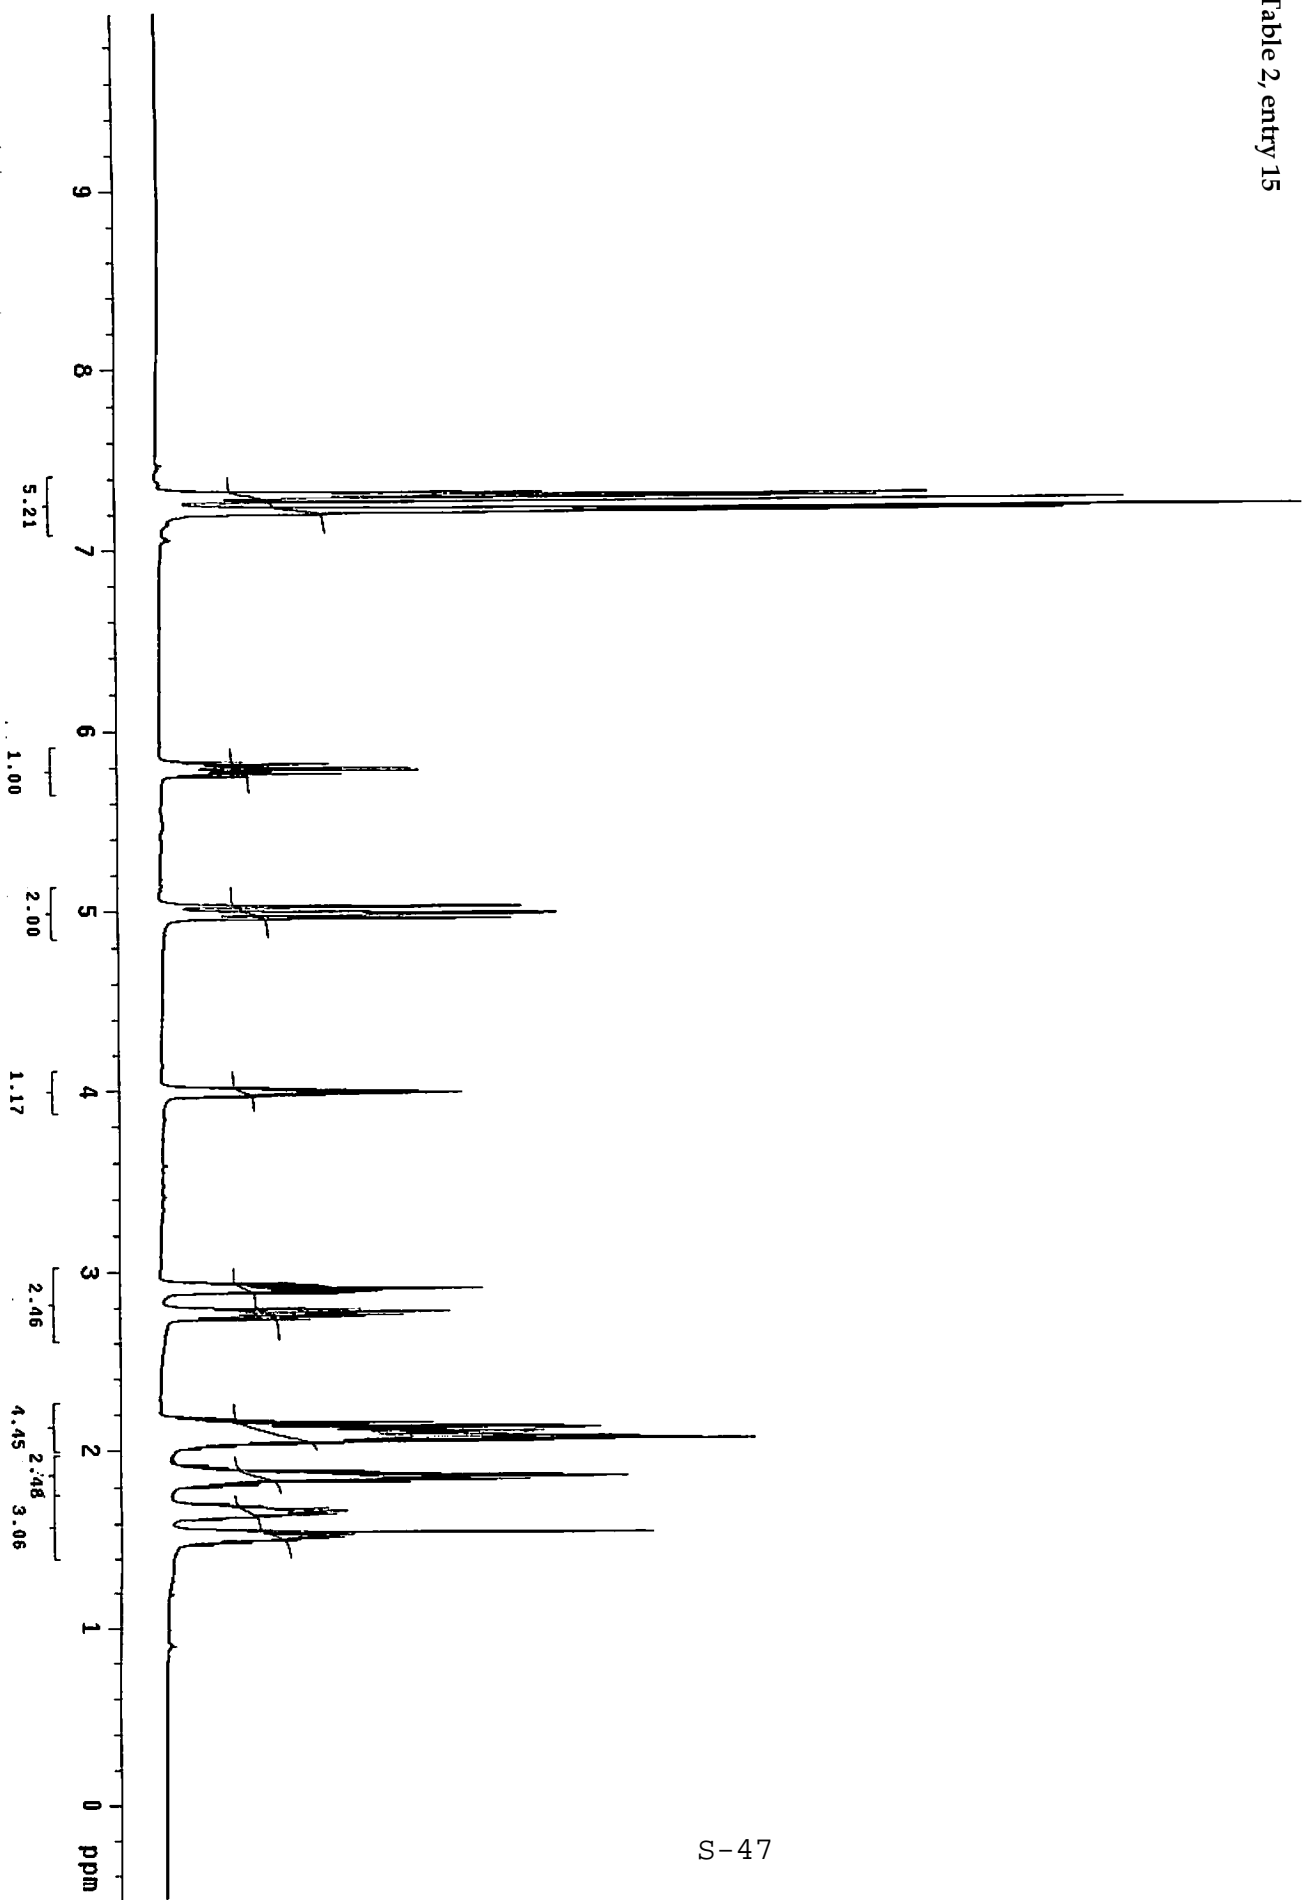

TsO  
Table 2, entry 16

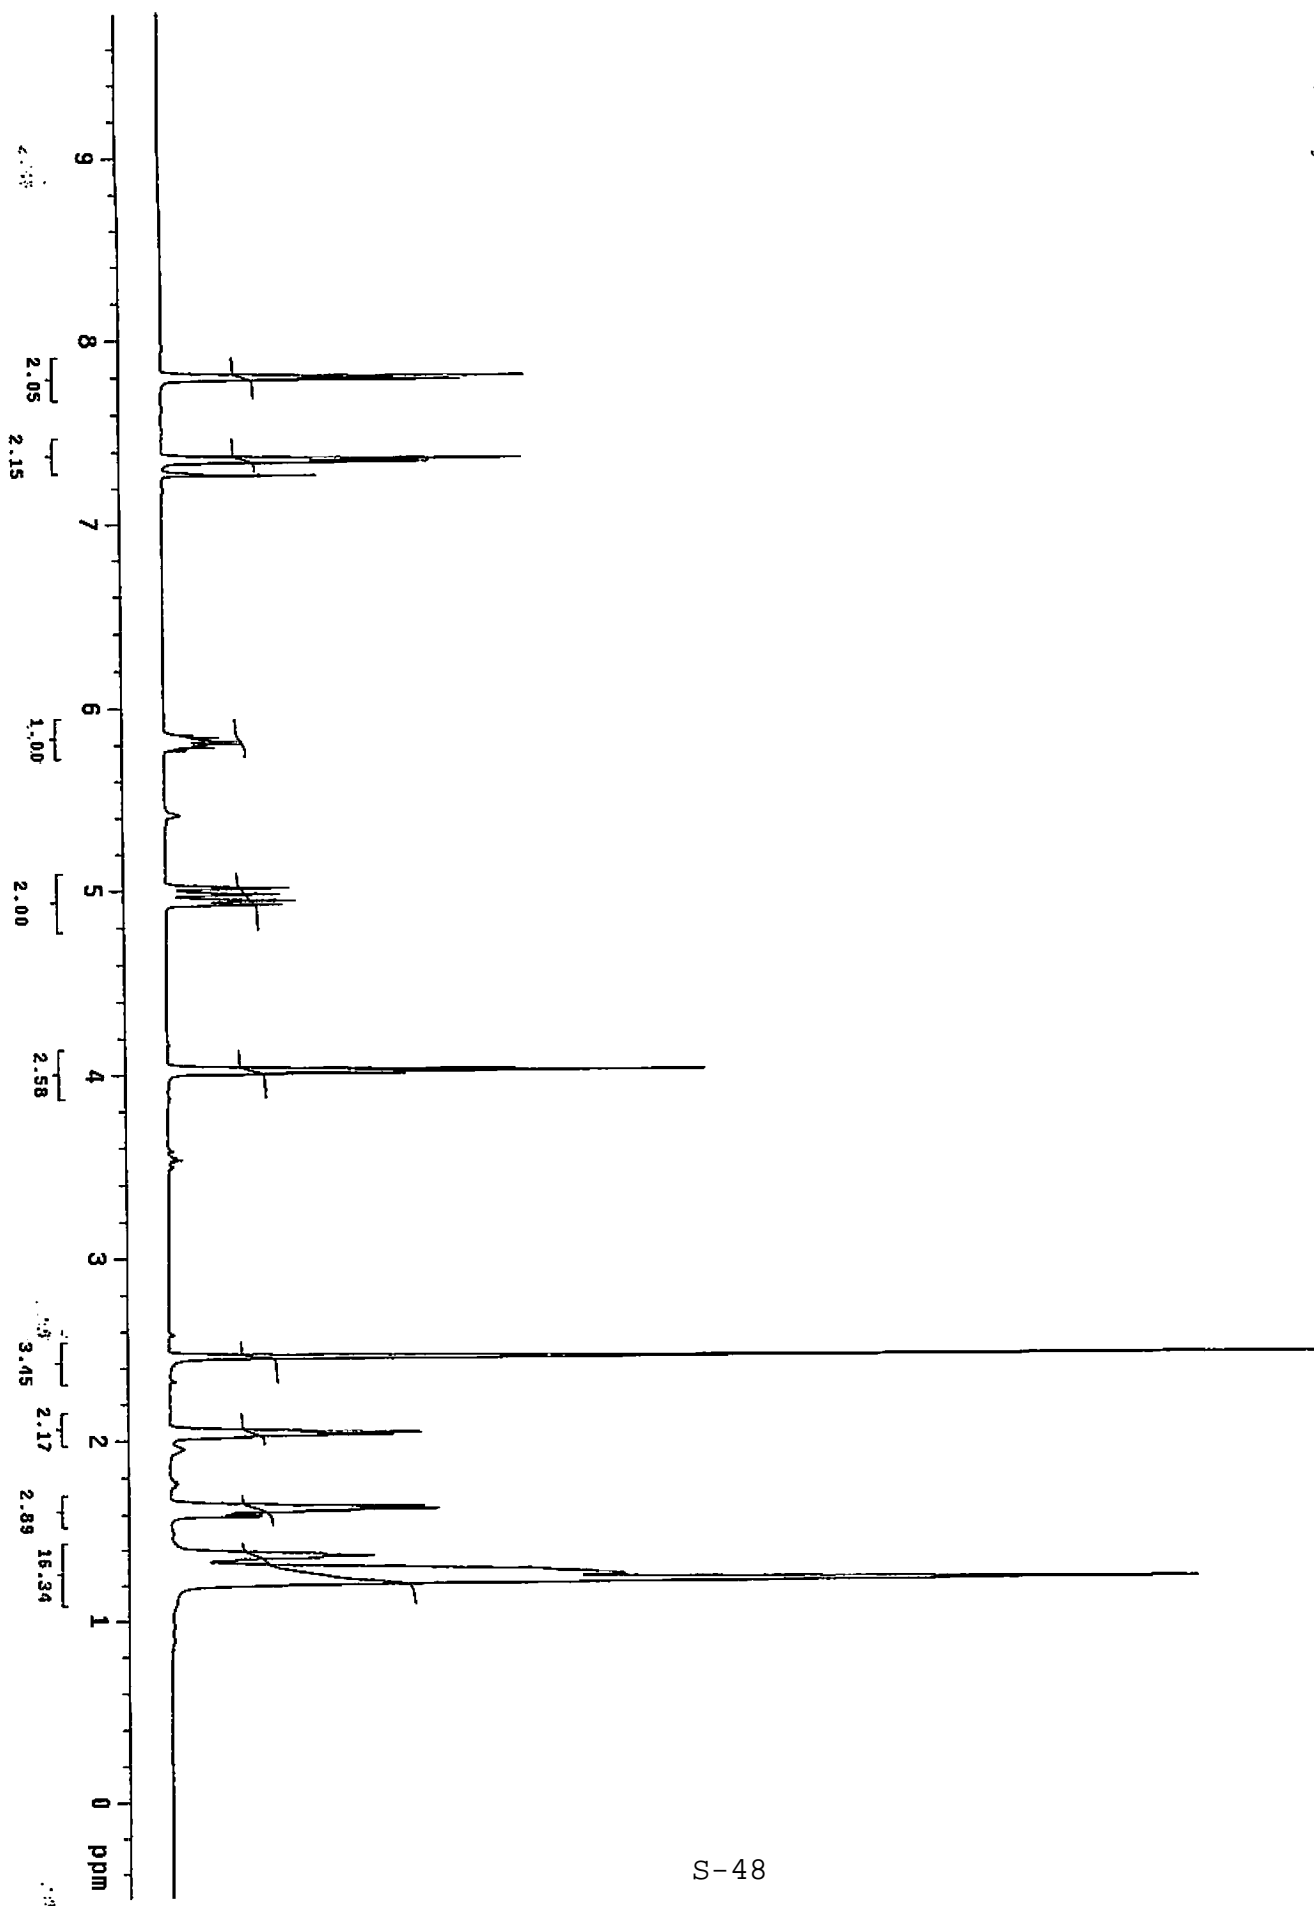



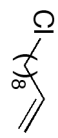

Table 2, entry 17

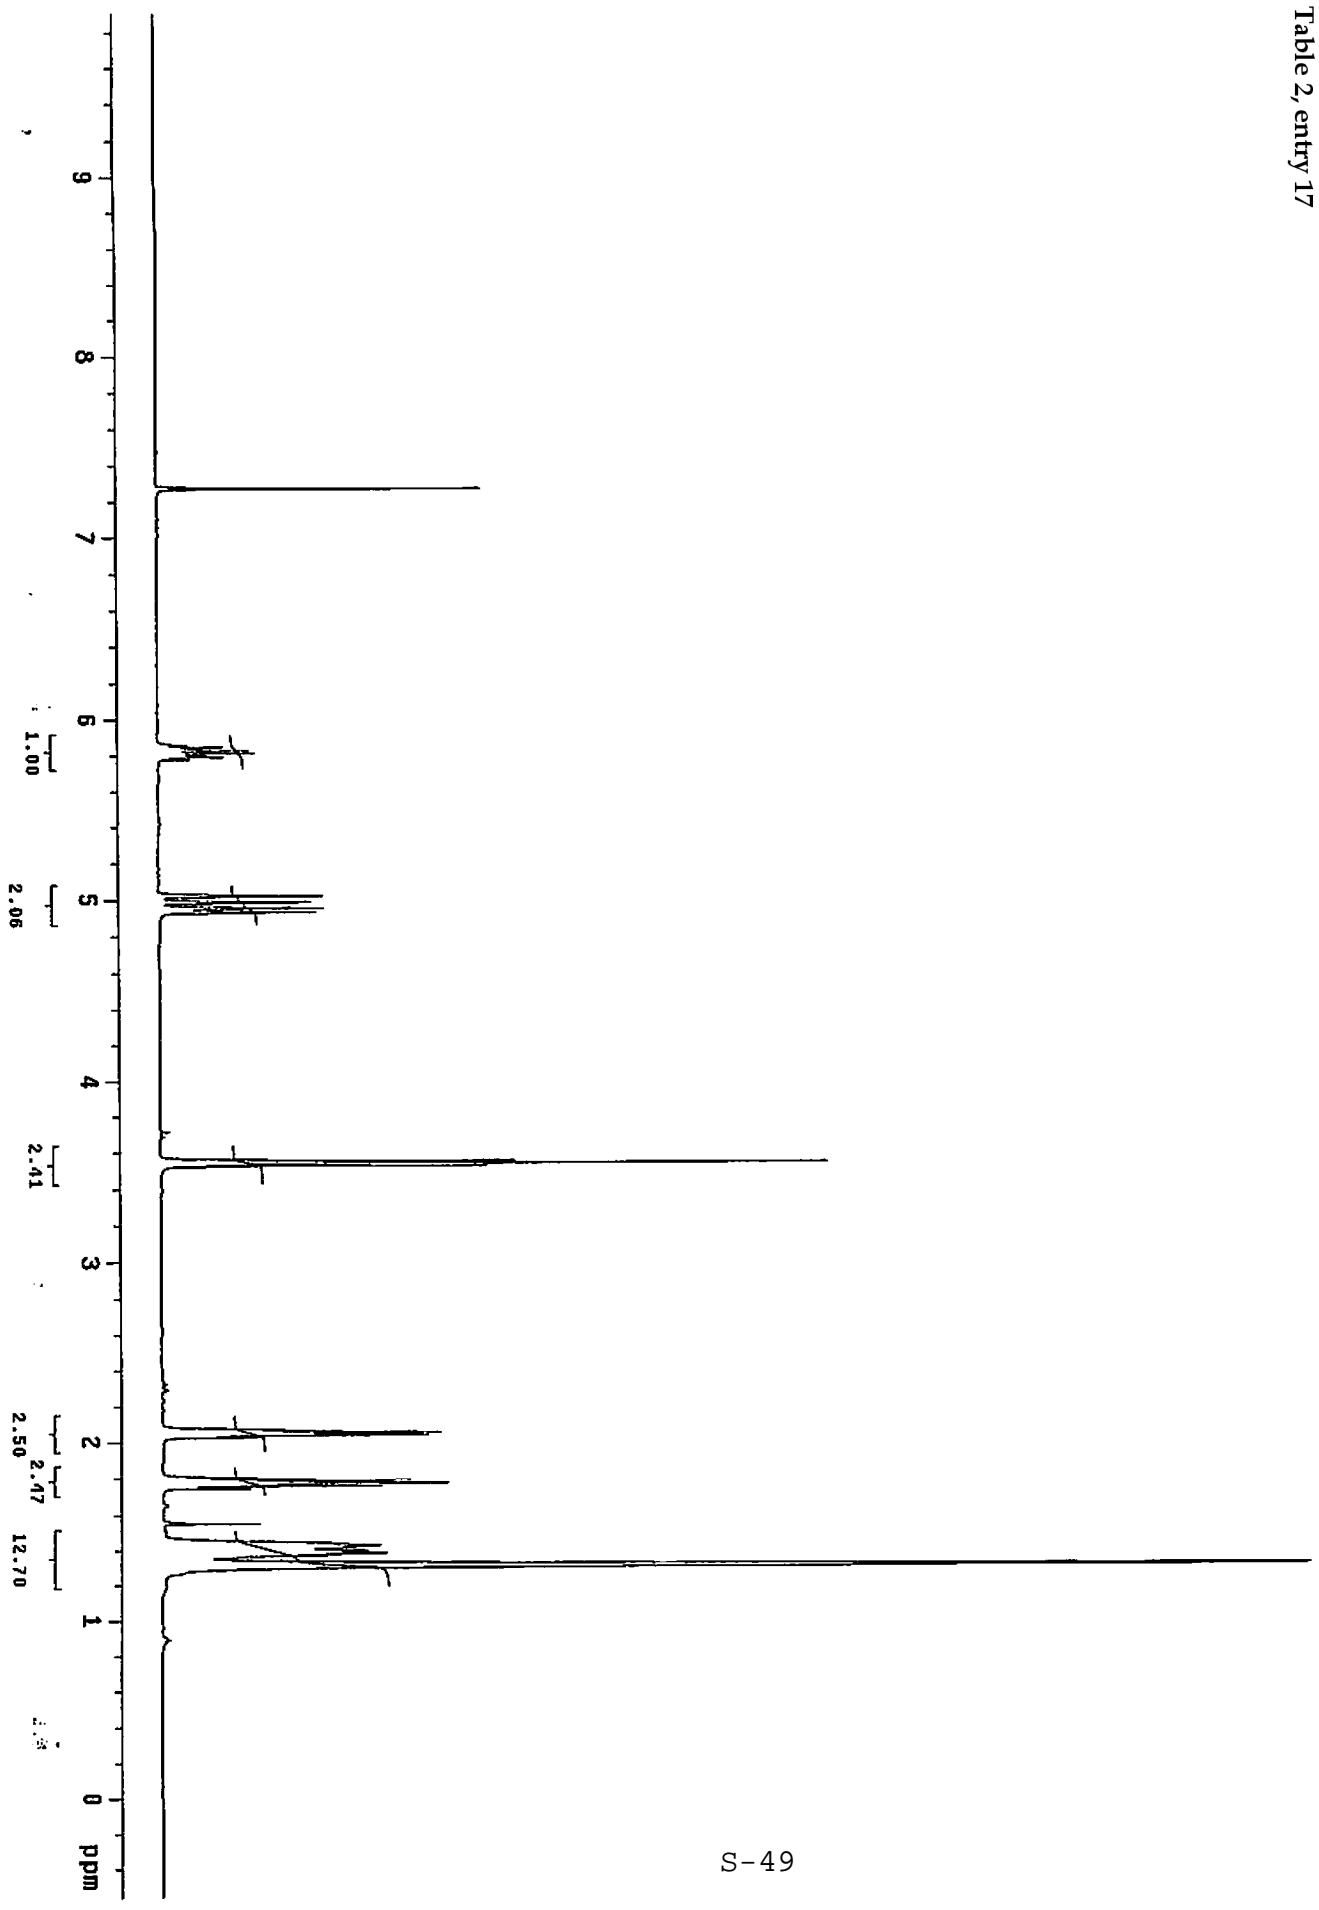

Me(CH<sub>2</sub>)<sub>8</sub>   
Table 3, entry 1

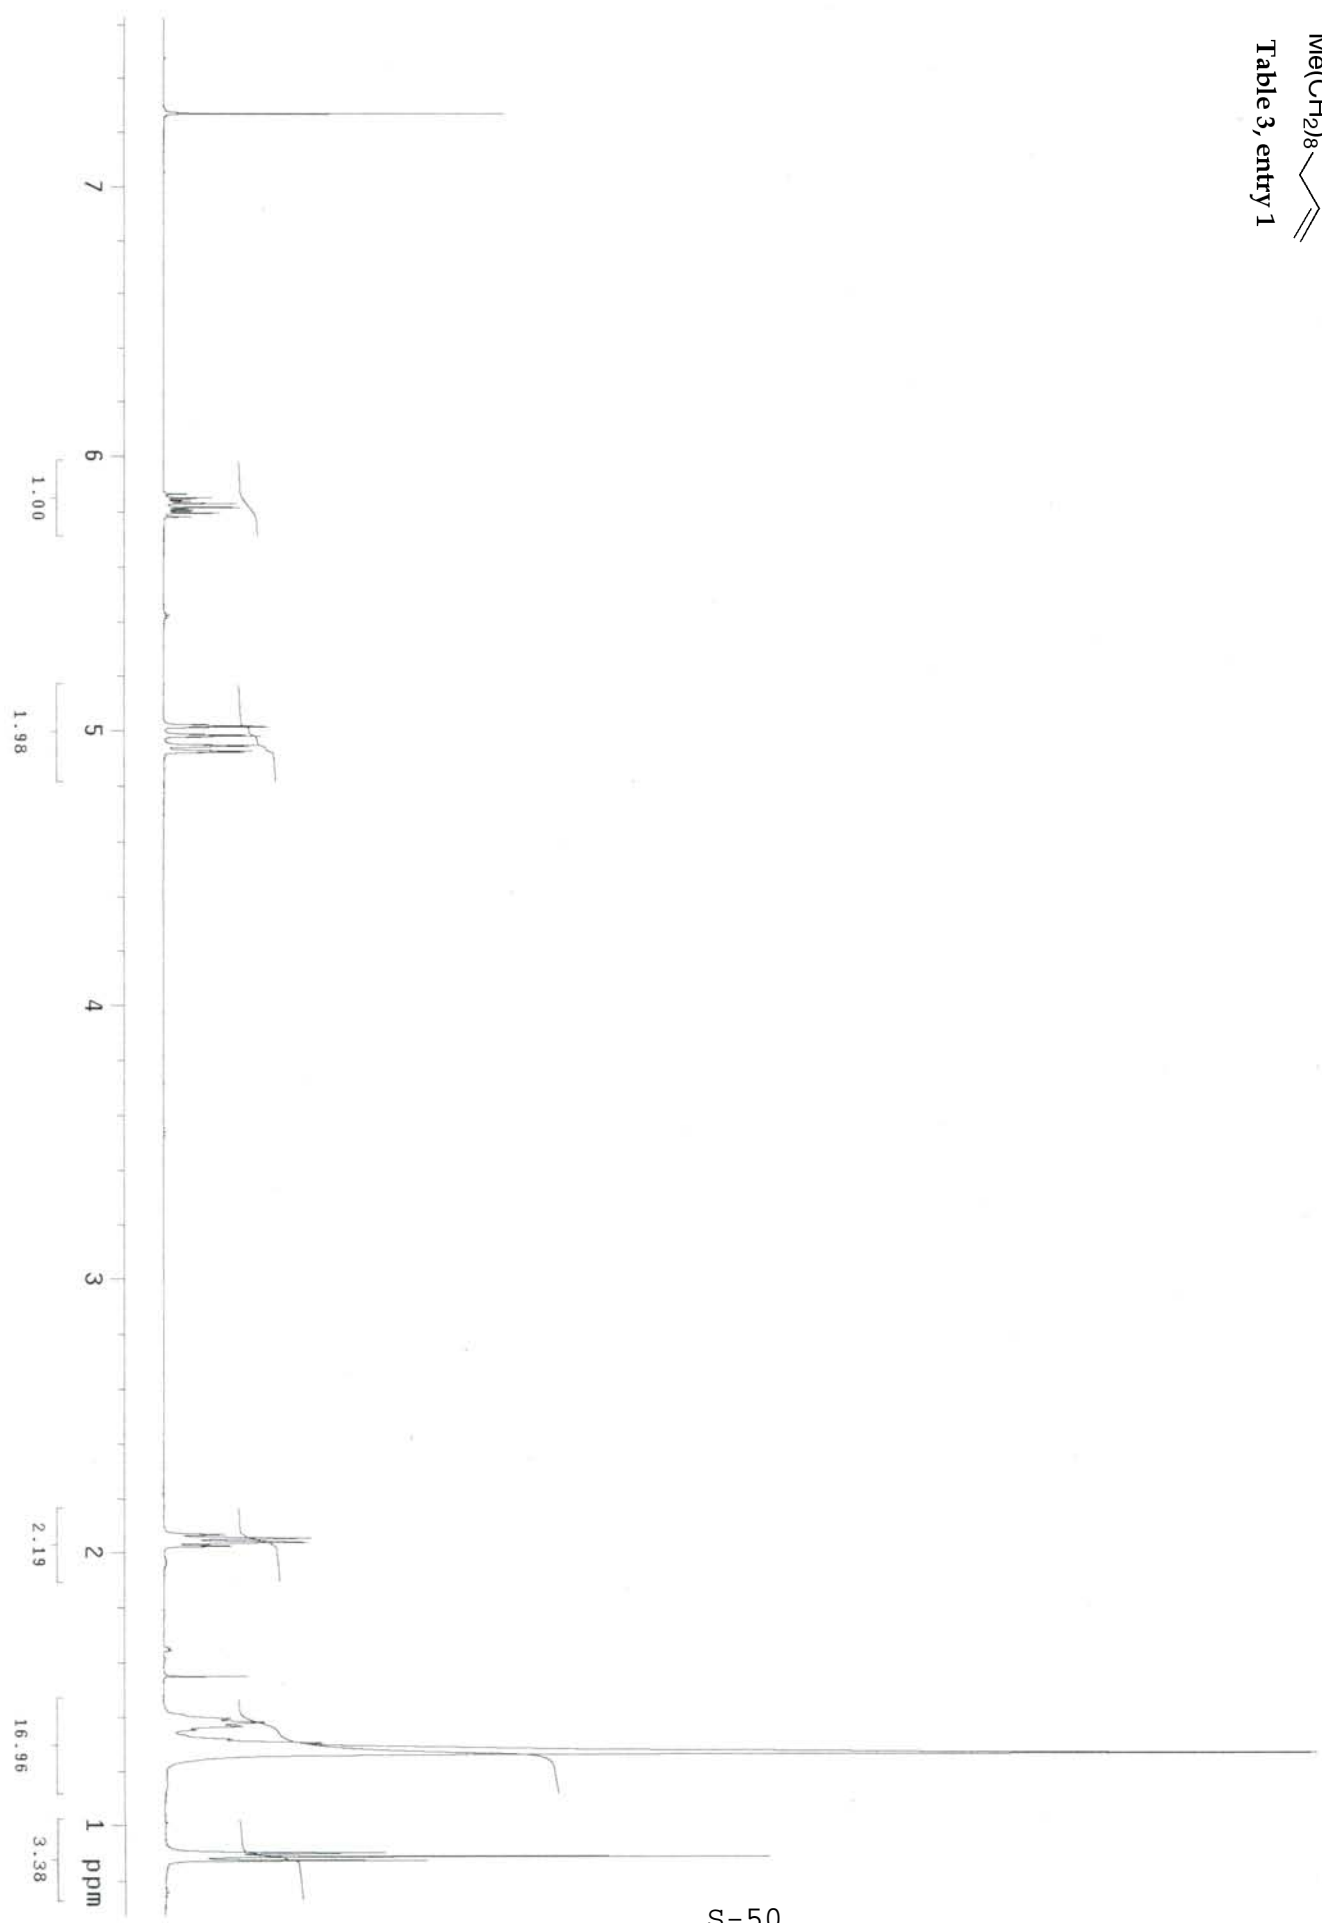

STANDARD PROTON PARAMETERS

```

exp1 s2pu1
SAMPLE      Oct 23 2011      DEC. & VT      125.672
solvent     C13
file        /data/export/~ dpwr      30
home/gfu/fuabis/bu~ dm              0
11winkie/Ab-1056-1~ dm              nnn
H-fid       H-fid                   w
ACQUISITION
sfrq        499.746      dmf         10000
tn          HI          dseq         1.0
dt          3.001       homo        n
np          63050       PROCESsing
sw          10504.2     wfft11e
fb          not used   proc         ft
bs          8          fn          262144
tpwr        56        math
pw          8.6
dl          2.000      werr
LOF         1519.5     wexp
nt          8          wbs
ct          8          wnt
alock       not used
gain        n
flags       not used
fl          n
in          n
dp          y
hs          nm
DISPLAY
sp          -322.8
wp          4996.7
vs          33
sc          0
wc          250
h2mm       19.99
ts          33.57
ff1        1233.8
rfp        0
th         7
ins        100.000
at         cdc      ph
  
```

Table 3, entry 2

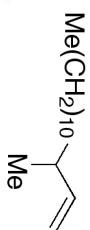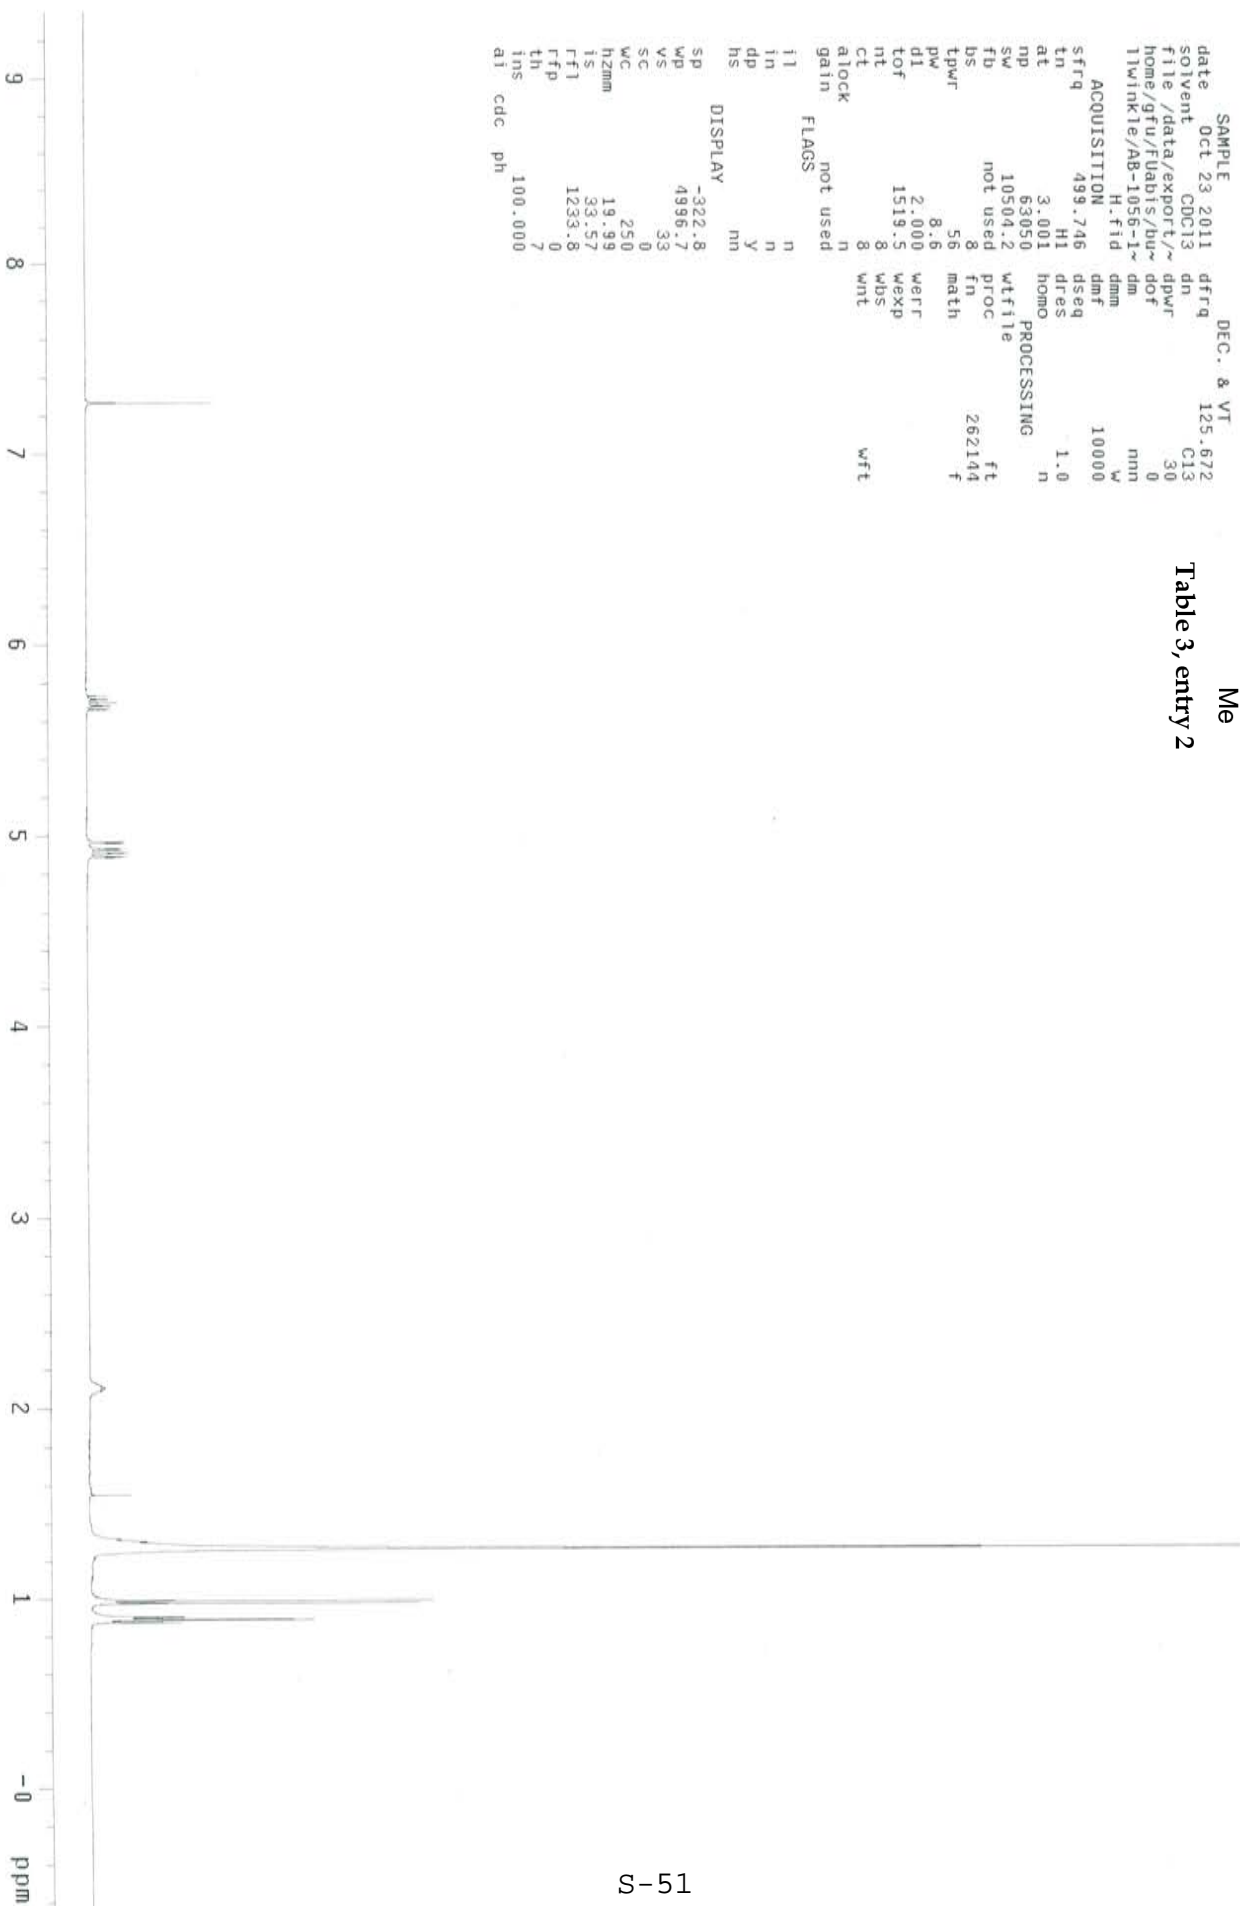

STANDARD PROTON PARAMETERS

expl s2pu1

SAMPLE  
 date Oct 15 2011  
 solvent CDCl3  
 file /data/export/~ dpwr  
 home/gfu/fuabits/bu- dof  
 11winkle/AB-1053-1~  
 H.fid

DEC. & VT  
 125.672  
 C13  
 30  
 0  
 mm  
 W  
 10000

ACQUISITION  
 sfrq 499.746  
 tn H1  
 at 3.001  
 np 63050  
 sw 10504.2  
 fb not used  
 bs 8  
 lpwr 56  
 pw 8.6  
 dl 2.000  
 tof 1519.5  
 nt WDS  
 ct 8  
 gain not used

PROCESSING  
 homo 1.0  
 dres n  
 wtfile ft  
 proc 262144  
 fn  
 math  
 warr  
 wexp  
 wds  
 wnt

ft  
 262144  
 f  
 math  
 warr  
 wexp  
 wds  
 wnt

not used  
 n  
 n  
 n  
 Y  
 nm

DISPLAY  
 SP -129.6  
 WP 6142.3  
 VS 77  
 SC 0  
 WC 250  
 hzmm 24.57  
 IS 33.57  
 rffl 1233.8  
 rfp 0  
 th 7  
 ins 100.000  
 at cdc ph

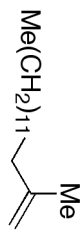

Table 3, entry 3

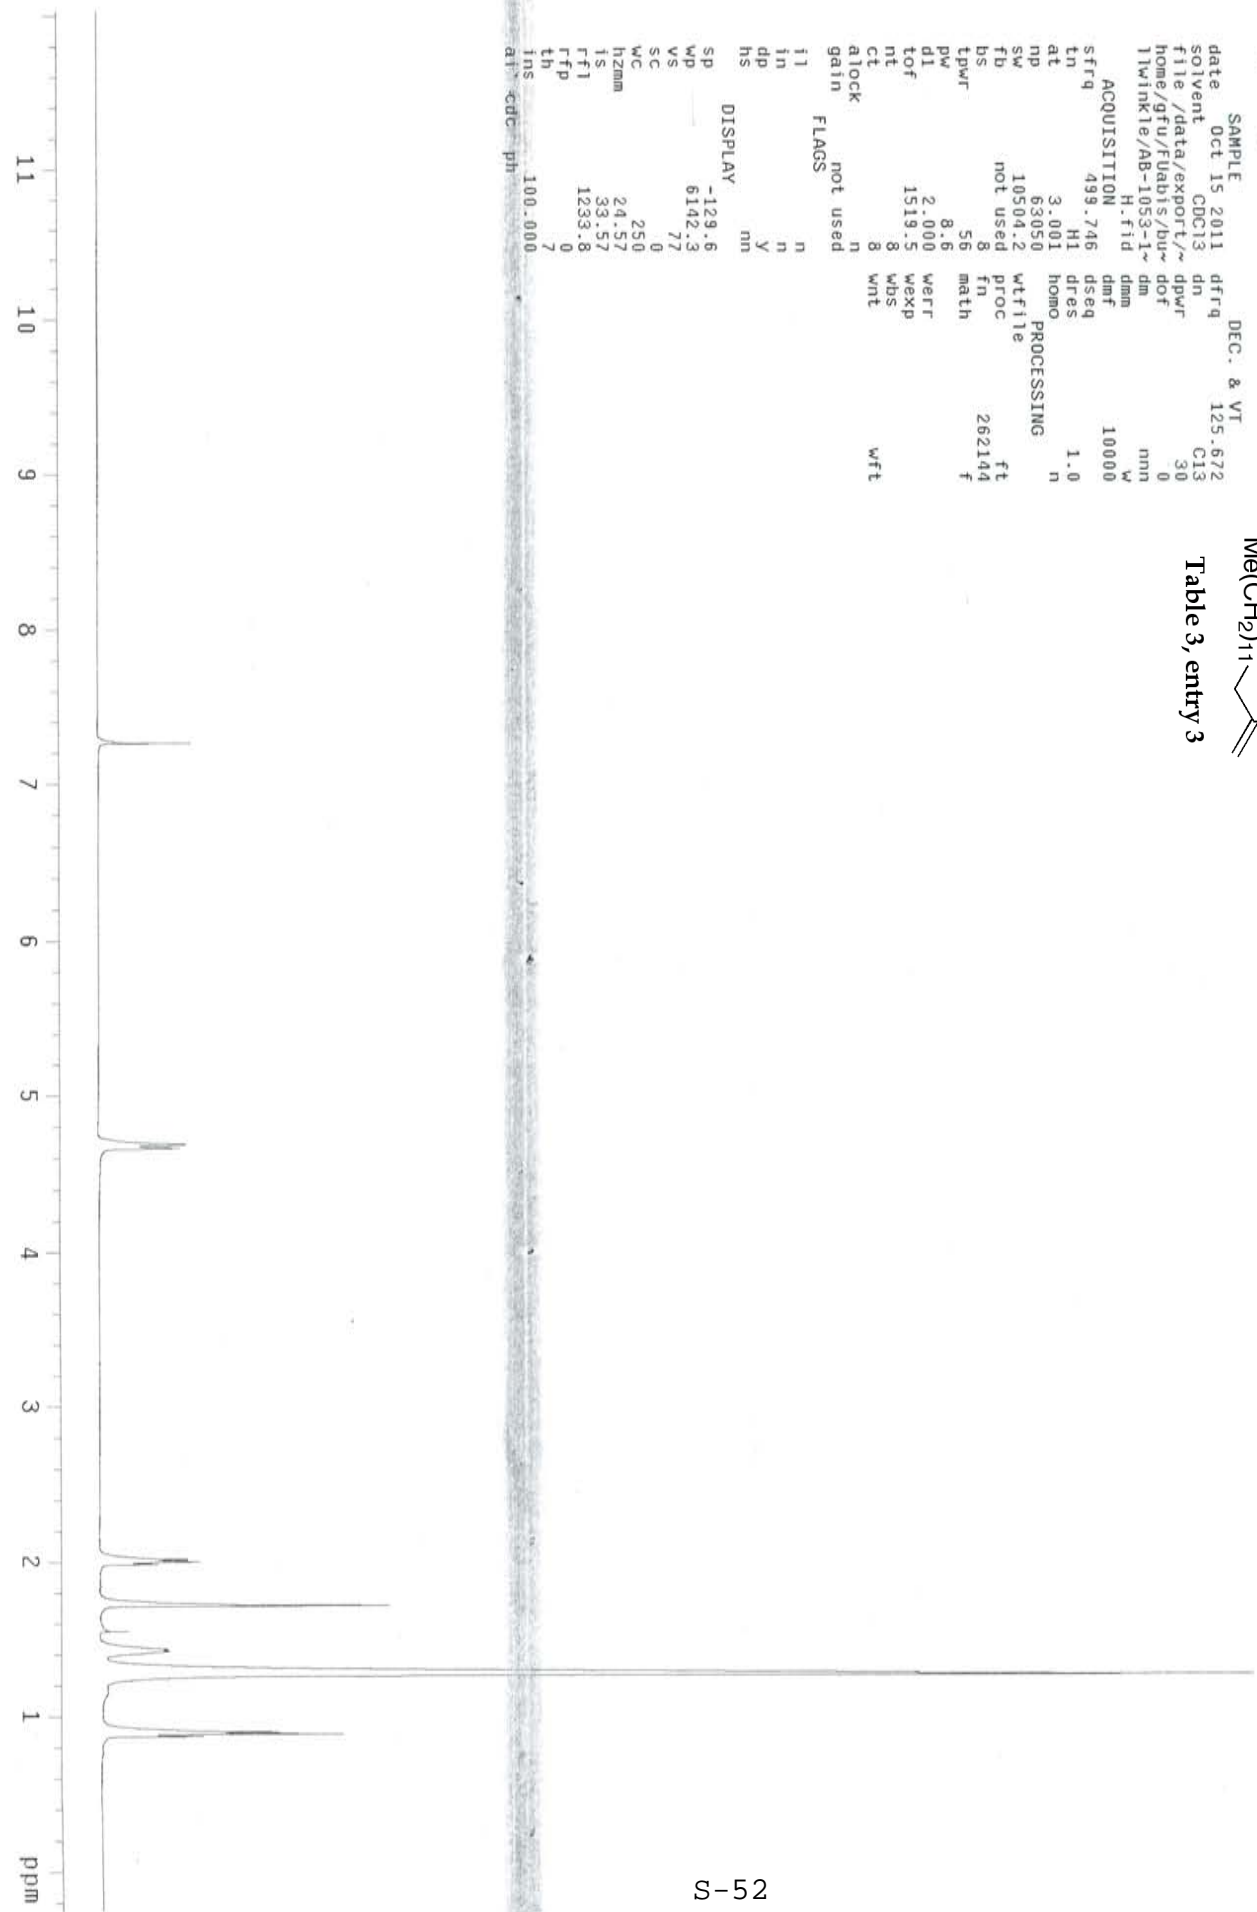

STANDARD PROTON PARAMETERS

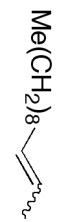

Table 3, entry 4

```

SAMPLE          DEC. & VT
date            Dec 19 2011 125.672
solvent         CDC13      C13
file            /data/export/~ dn
home/gfu/FUabis/bu~ dpwr 30
l1winkle/AB-1145-1~ dof  0
l1winkle/AB-1145-1~ dm   mm
                    H.f1d  W
ACQUISITION     499.746  dmf  10000
                    H1      dseq
tn            3.001  dres  1.0
at            63050  homo  n
np            10504.2  wtfile
sw            not used  proc
fd            not used  ft
bs            56      fn   262144
tpwr          8.6     math f
pw            2.000  werr
dl            1519.5  wexp
nt            8      wbs
ct            8      wnt
atlock        n
gain          not used
                    FLAGS
i1            n
in            n
dp            Y
hs            mm
                    DISPLAY
sp            -46.7
wp            4831.0
vs            76
sc            0
wc            250
h2mm         19.32
is            33.57
f1l          1233.8
r1p          0
th            7
ins          100.000
ai          cdc  ph
    
```

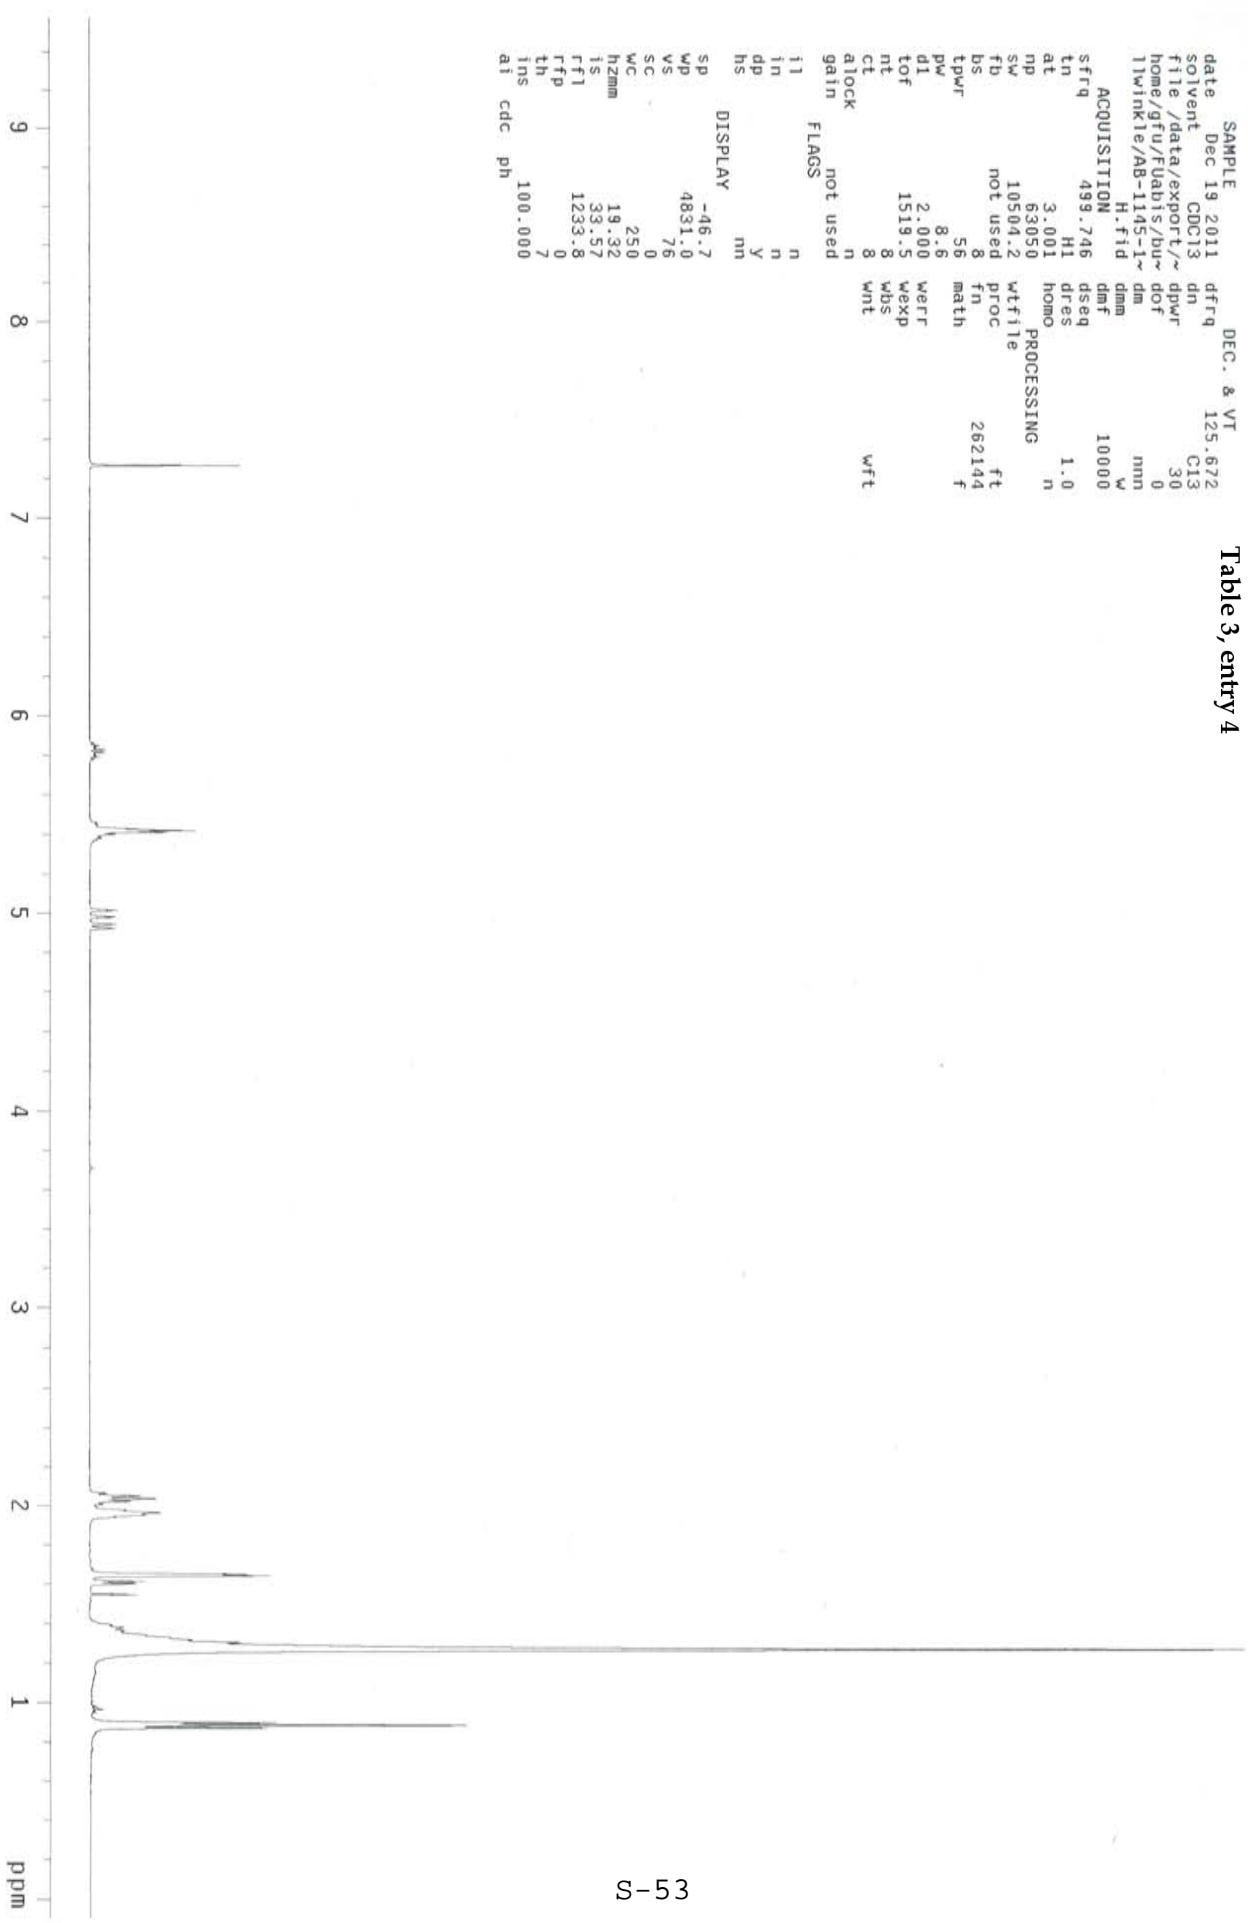

STANDARD PROTON PARAMETERS

expt s2pu1

Me(CH<sub>2</sub>)<sub>8</sub>

Table 3, entry 5

|             |                     |            |           |         |
|-------------|---------------------|------------|-----------|---------|
| SAMPLE      | Oct 26 2011         | dfreq      | DEC. & VT | 125.672 |
| solvent     | CDCl <sub>3</sub>   | dn         |           | C13     |
| file        | /data/export/~ dpwr | dpwr       |           | 30      |
| home        | /gfu/Fuabts/bu~ dof | dof        |           | 0       |
| llwinkle    | /AB-1065-1~ dm      | dm         |           | nnn     |
|             | H.fid               | dmm        |           | v       |
| ACQUISITION |                     | dmf        |           | 10000   |
| sfrq        | 499.746             | dseq       |           | n       |
| tn          | H1                  | dres       |           | 1.0     |
| at          | 3.001               | homo       |           | n       |
| np          | 63050               | PROCESSING |           |         |
| sw          | 10504.2             | wfille     |           | ft      |
| fb          | not used            | proc       |           | 262144  |
| bs          | 8                   | fn         |           | f       |
| tpwr        | 56                  | math       |           |         |
| pw          | 8.6                 | werr       |           |         |
| dl          | 2.000               | wexp       |           |         |
| tof         | 1519.5              | wbs        |           |         |
| nt          | 8                   | wnt        |           | wft     |
| ct          | 8                   |            |           |         |
| alock       | not used            |            |           |         |
| gain        | n                   |            |           |         |
| FLAGS       |                     |            |           |         |
| il          | n                   |            |           |         |
| in          | n                   |            |           |         |
| dp          | y                   |            |           |         |
| hs          | nn                  |            |           |         |
| DISPLAY     |                     |            |           |         |
| SP          | -170.9              |            |           |         |
| WP          | 4817.3              |            |           |         |
| VS          | 77                  |            |           |         |
| SC          | 0                   |            |           |         |
| WC          | 250                 |            |           |         |
| hzm         | 19.27               |            |           |         |
| is          | 33.57               |            |           |         |
| rfl         | 1233.8              |            |           |         |
| rtp         | 0                   |            |           |         |
| th          | 7                   |            |           |         |
| ins         | 100.000             |            |           |         |
| ai          | cdc                 | ph         |           |         |

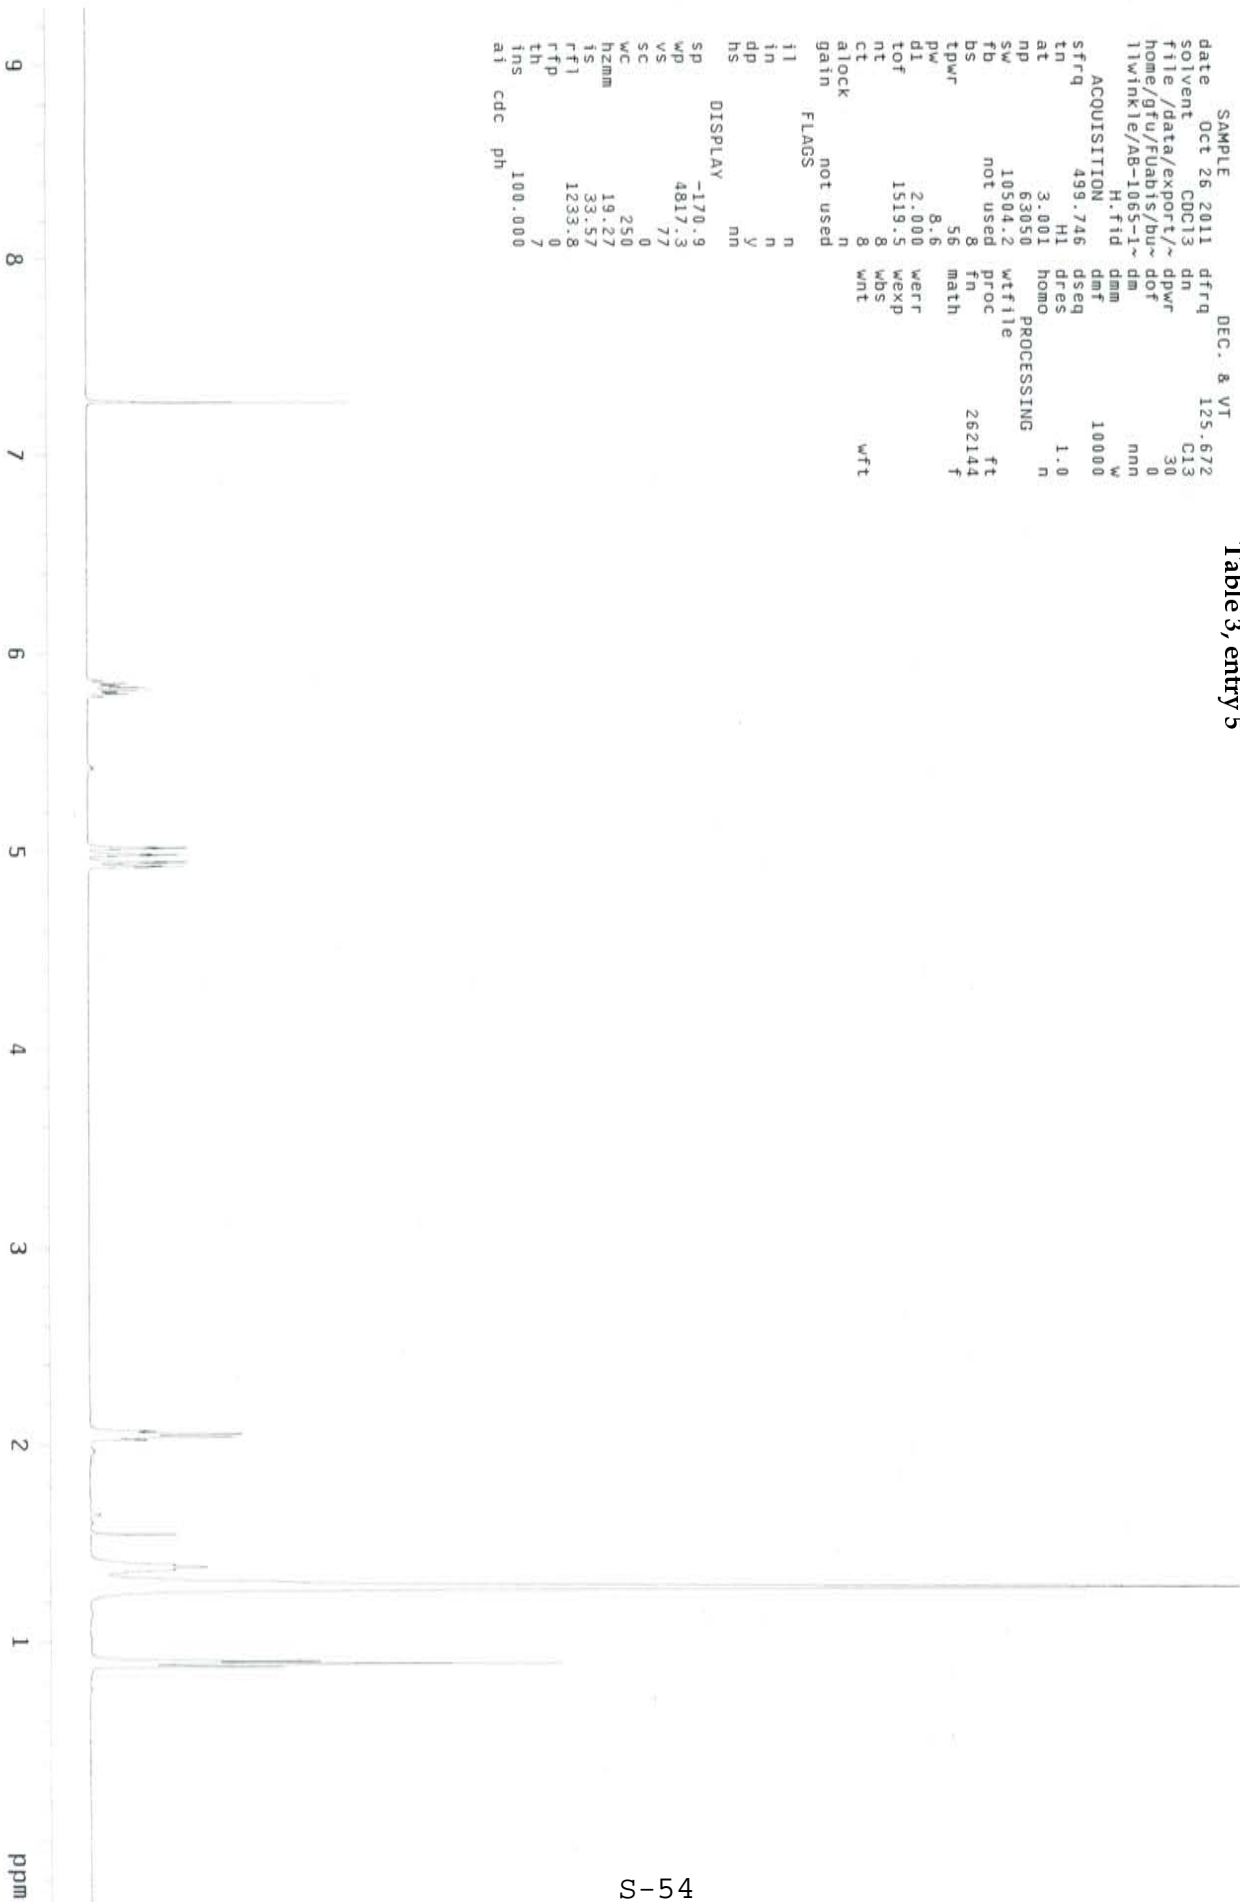

CC(OBn)C=CCO  
 R = 1-ethoxyethyl  
 Figure 2

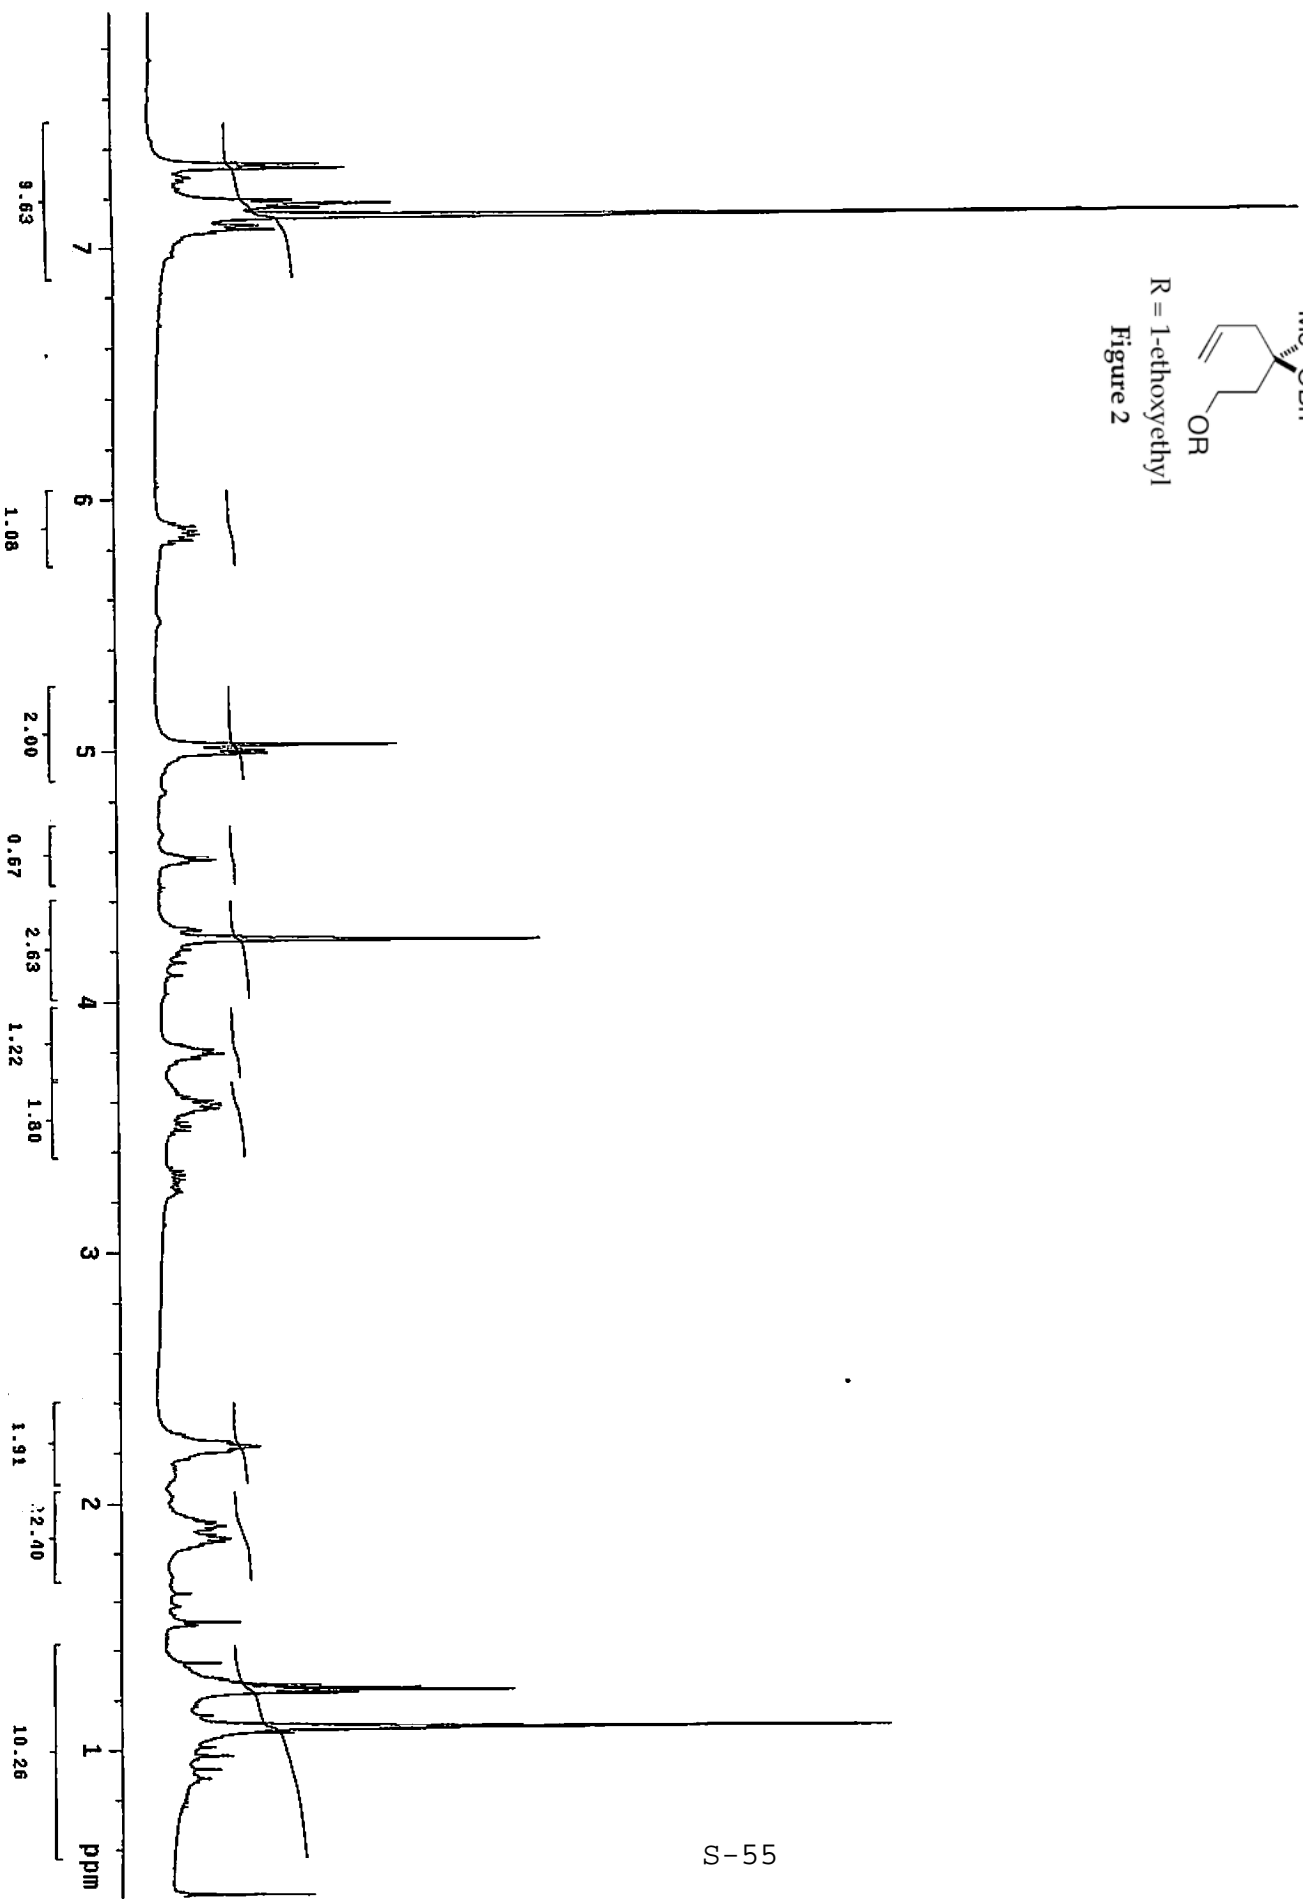

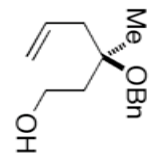

Figure 2

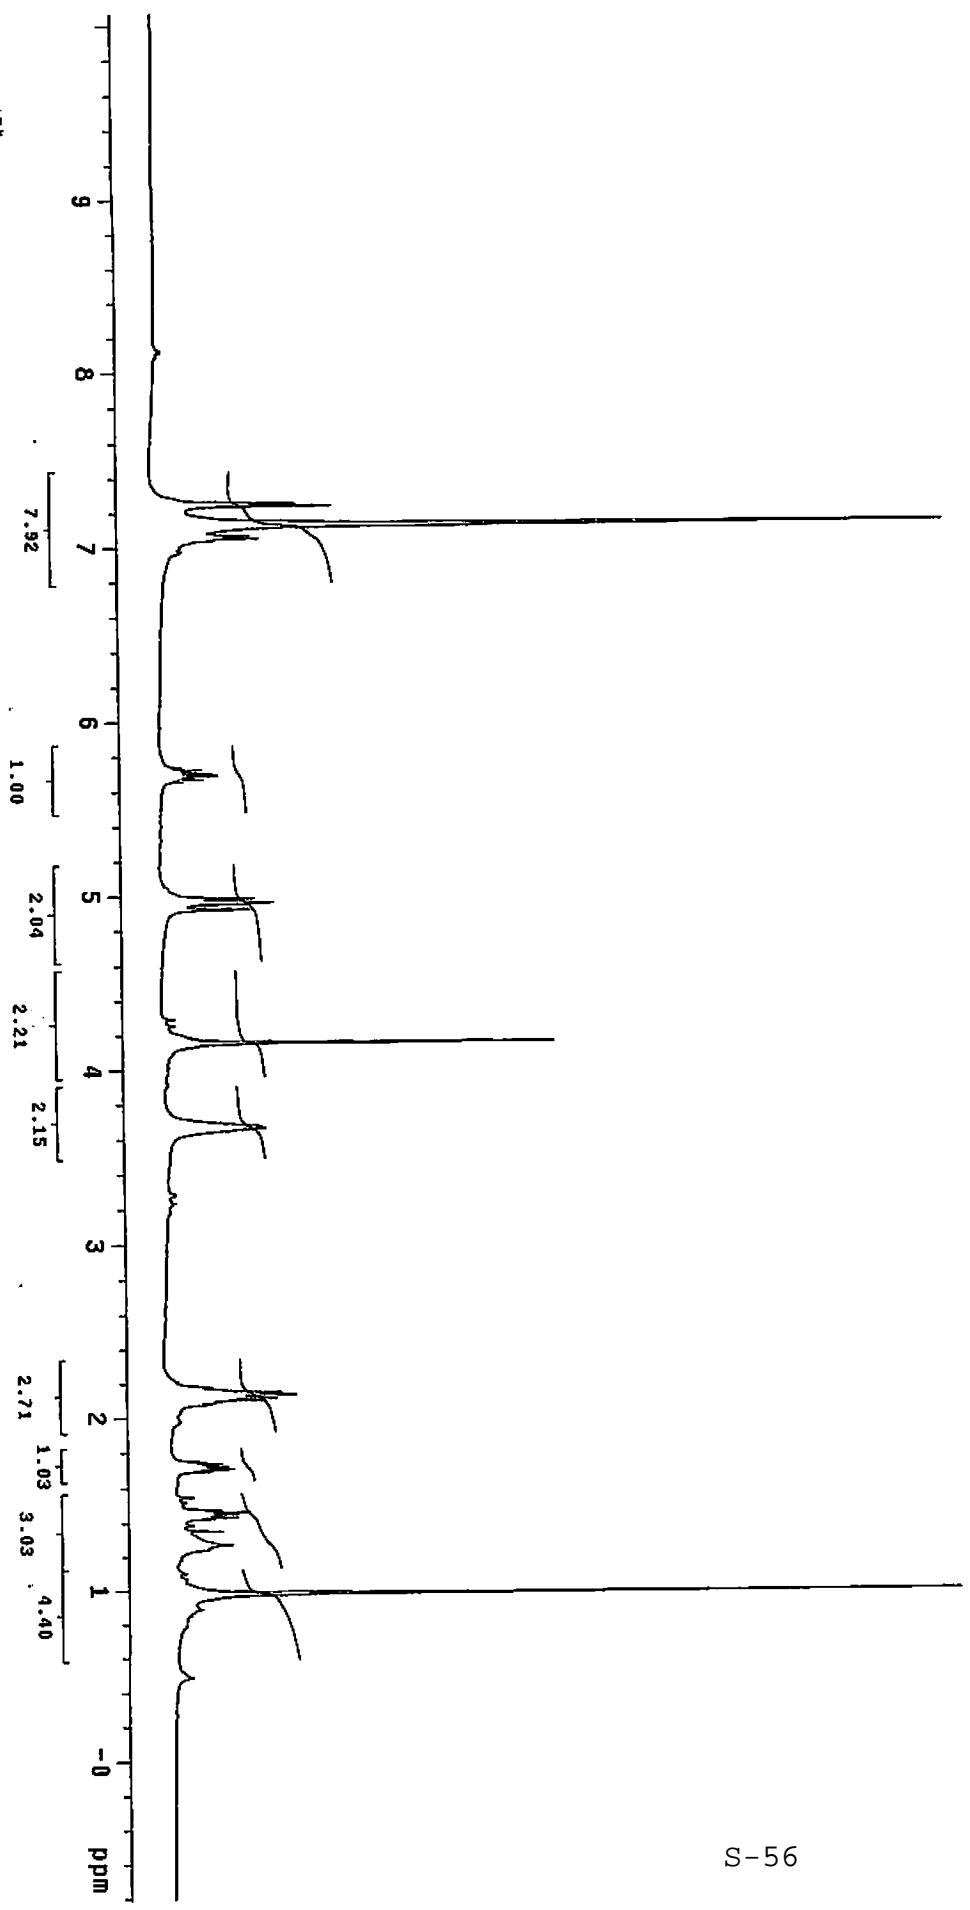

Supplement: NIHMS402431-supplement-1_si_001.pdf [file NIHMS402431-supplement-1_si_001.pdf]
